# Supplementary material for: Functional Genomic Analysis of Candida albicans Adherence Reveals a Key Role for the Arp2/3 Complex in Cell Wall Remodelling and Biofilm Formation
Source: PLoS Genet. 2016 Nov 21;12(11):e1006452. doi: 10.1371/journal.pgen.1006452 (PMC5147769; doi:10.1371/journal.pgen.1006452)
Supplement: S1 Table — A list of the mutants in the GRACE library that were screened for adherence capabilities in the absence and presence of doxycycline (sheet1) and those mutants that were found to exhibit defects in adherence but be non-essential (sheet 2). (XLSX) [file pgen.1006452.s001.xlsx]

## Sheet: Sheet 1
Supplementary Data 1: GRACE pooled adherence analysis. A list of the mutants in the GRACE library that were screened for adherence capabilities in the absence and presence of doxycycline (sheet1) and those mutants that were found to exhibit defects in adherence but be non-essential (sheet 2). We also highlighted previously reported regulators of biofilm formation (from reference 5) to correlate o…
Merck Strain ID	orf19 name	Common	Description	LOG2 Enrichment in Wash:Adhered without DOX	LOG2 Enrichment in Wash:Adhered with DOX	Essentiality Score	Known regulator of biofilm formation (ref 5)
1365	orf19.10	ALK8	Alkane-inducible cytochrome P450; catalyzes hydroxylation of lauric acid to hydroxylauric acid; overproduction causes fluconazole resistance in WT and causes multidrug resistance in a cdr1 cdr2 double mutant; rat catheter biofilm repressed	0.0841055	-0.0107132	0+
3773	orf19.1010	MNT3	Mannosyltransferase; transcription elevated in cyr1, chk1, nik1, and sln1 homozygous null mutants; fungal-specific (no human or murine homolog)	-0.0715101	0.0744406	NA
966	orf19.1011	MNN21	Ortholog(s) have alpha-1,2-mannosyltransferase activity, role in protein glycosylation and Golgi apparatus localization	0.129703	-0.183475	1+
142	orf19.1026		Ortholog(s) have role in exonucleolytic trimming to generate mature 3'-end of 5.8S rRNA from tricistronic rRNA transcript (SSU-rRNA, 5.8S rRNA and LSU-rRNA), more	#N/A	#N/A	4+
2675	orf19.1037		Protein of unknown function; rat catheter biofilm repressed	0.123071	0.0632451	0+
1319	orf19.1040	MAD2	Protein required for the spindle assembly checkpoint of the cell cycle; necessary for survival in host cell macrophages and for virulence in a mouse model of systemic candidiasis	0.0595738	-0.0187688	3.5+
1583	orf19.1042	POR1	Mitochondrial outer membrane porin; in detergent-resistant membrane fraction (possible lipid raft component); antigenic in human, mouse; Hap43p-induced; flucytosine-, macrophage-, farnesol- induced; fluconazole, caspofungin repressed	-0.000781058	0.0119857	0+
4122	orf19.1058		Ortholog(s) have ubiquitin binding activity, role in ubiquitin-dependent protein catabolic process and proteasome regulatory particle, lid subcomplex, proteasome storage granule localization	0.0311788	0.00764693	NA
2442	orf19.1062		Ortholog of C. parapsilosis CDC317 : CPAR2_107000, Candida tenuis NRRL Y-1498 : CANTEDRAFT_113990, Candida dubliniensis CD36 : CD36_04020 and Pichia stipitis Pignal : PICST_32780	0.11822	0.071271	3.5+
958	orf19.1063		Ortholog(s) have dolichyl-phosphate-mannose-glycolipid alpha-mannosyltransferase activity, role in GPI anchor biosynthetic process and integral to endoplasmic reticulum membrane, mannosyltransferase complex, mitochondrion localization	-0.0449795	-0.198907	1+
2441	orf19.1066	GIG1	Protein induced by N-acetylglucosamine (GlcNAc); localized in cytoplasm; mutation causes increased resistance to nikkomycin Z	-0.135901	-0.0268118	1+
1126	orf19.1069	RPN4	C2H2 transcription factor; putative regulator of proteasome genes; DNA recognition sequence (GAAGGCAAAA) enriched in regions upstream of proteasome genes; induced in core stress response; Hap43-induced; Spider biofilm induced	0.0333919	0.128224	1+
1254	orf19.1070		Ortholog(s) have cytoplasm localization	-0.00561752	-0.111464	0+
2348	orf19.1078	HBR2	Putative alanine glyoxylate aminotransferase; regulated by Gcn4p and hemoglobin; stationary phase enriched protein	0.128055	-0.0921058	0+
2347	orf19.1078	HBR2	Putative alanine glyoxylate aminotransferase; regulated by Gcn4p and hemoglobin; stationary phase enriched protein	-0.089422	-0.143916	0+
3767	orf19.1084	CDC39	Protein similar to S. cerevisiae Cdc39p, which is part of the CCR4-NOT transcription regulatory complex; transposon mutation affects filamentous growth	0.0426327	0.516511	NA
3768	orf19.1089	PEX11	Putative peroxisomal membrane protein; role in fatty acid oxidation; expression is Tac1-regulated; Hms1p-dependent induction by geldamycin; Spider biofilm induced	-0.0480508	-0.0678949	NA
2805	orf19.111	CAN2	Basic amino acid permease; arginine metabolism; regulated by Nrg1/Tup1; caspofungin, flucytosine induced; colony morphology-related regulation by Ssn6; Hap43-repressed; rat catheter and Spider biofilm induced; promoter bound by Efg1	-0.110834	-0.00437512	1+
695	orf19.1111		Ortholog(s) have chromatin binding, protein complex scaffold activity and role in RNA polymerase II transcriptional preinitiation complex assembly, histone acetylation	0.0924154	1.24414	4+
2378	orf19.1112	BUD7	Ortholog(s) have role in Golgi to plasma membrane transport, fungal-type cell wall chitin biosynthetic process and cell division site, clathrin-coated vesicle, cytosol, exomer complex, nucleus, ribosome localization	0.610274	0.410359	0+
3998	orf19.1114		Cytochrome c oxidase subunit; membrane-localized protein; rat catheter biofilm induced	0.452843	0.15874	NA
1549	orf19.1119	MTR10	Putative importin; member of a family of fungal-specific nuclear importins; Mig1-regulated	0.295528	0.329156	0+
2329	orf19.1124		Protein of unknown function; flow model biofilm induced; Spider biofilm induced	0.147547	-0.117204	0+
1666	orf19.1142		Putative vacuolar transporter of large neutral amino acids; induced by alpha pheromone in SpiderM medium	-0.172682	0.0138324	0+
1717	orf19.1149	MRF1	Putative mitochondrial respiratory protein; induced by farnesol, benomyl, nitric oxide, core stress response; oxidative stress-induced via Cap1; stationary-phase enriched protein; Spider biofilm induced	-0.00352984	-0.0230227	1+
3394	orf19.1152		Protein of unknown function; induced in core stress response; Gcn2 and Gcn4 regulated; flow model biofilm induced; Spider biofilm induced	-0.0752245	0.0175731	0+
2846	orf19.1153	GAD1	Putative glutamate decarboxylase; alkaline, macrophage-downregulated gene; amphotericin B induced; induced by Mnl1 under weak acid stress; stationary phase enriched protein	-0.171411	-0.0933362	0+
1262	orf19.1154	EGD1	Putative GAL4 DNA-binding enhancer protein; soluble protein in hyphae; biofilm induced; macrophage/pseudohyphal-induced; equal level of protein in exponential and stationary growth phase yeast cultures; Spider biofilm repressed	0.178017	0.316494	0+
2369	orf19.1155	DPP2	Protein similar to S. cerevisiae pyrophosphate phosphatase Lpp1p; possible role in farnesol biosynthesis	0.00402006	-0.0152306	0+
5654	orf19.1156	FUS1	Membrane protein required for mating; ortholog of S. cerevisiae Fus1; transcript induced by Cph1 in cells homozygous for the MTLa locus; alpha factor induced	0.238893	0.184459	NA
1750	orf19.1159		Protein similar to A. nidulans CysA serine O-trans-acetylase; suggests that C. albicans uses an O-acetyl-serine (OAS) pathway of sulfur assimilation; F-12/CO2 early biofilm induced; Spider biofilm induced	0.101541	-0.00373518	2+
1751	orf19.1160		Ortholog(s) have COPII adaptor activity and role in ER to Golgi vesicle-mediated transport, fungal-type cell wall organization, protein glycosylation, protein retention in Golgi apparatus	0.074192	-0.0677851	0+
3769	orf19.1161	PLD1	Phospholipase D1; required for phosphatidic acid and for most diacylglycerol production; required for wild-type mouse virulence, but not rat oral virulence; mutant defect in hyphal growth on solid substrates; similar to S. cerevisiae Spo14p	0.117511	0.141519	NA
1786	orf19.1167		Ortholog(s) have sulfonate dioxygenase activity and role in sulfur compound catabolic process	-0.136689	0.0757959	0+
1229	orf19.117		Ortholog(s) have SNAP receptor activity, role in vesicle fusion and SNARE complex, extrinsic to plasma membrane localization	0.0979441	0.378274	4+
1785	orf19.1170	ARO7	Putative chorismate mutase; fungal-specific (no human or murine homolog); alkaline upregulated	-0.0165552	0.168199	3.5+
1403	orf19.1171		Ortholog of C. parapsilosis CDC317 : CPAR2_208080, Candida tenuis NRRL Y-1498 : CANTEDRAFT_120956, Debaryomyces hansenii CBS767 : DEHA2F24508g and Candida dubliniensis CD36 : CD36_10780	-0.131659	-0.0898411	2+
1350	orf19.118	FAD2	Delta-12 fatty acid desaturase, involved in production of linoleic acid, which is a major component of membranes	-0.13469	-0.351522	0+
2733	orf19.1180		Putative 2-aminoadipate transaminase; rat catheter and Spider biofilm repressed	-0.0331311	-0.0961787	0
2944	orf19.1185		Ortholog(s) have ubiquitin-protein ligase activity and role in establishment of mitotic spindle orientation, mitotic cell cycle spindle assembly checkpoint, protein autoubiquitination, septin ring assembly	-0.0300885	-0.207953	0+
2427	orf19.1191		Ortholog(s) have ubiquitin-protein ligase activity, role in ER-associated protein catabolic process and Hrd1p ubiquitin ligase ERAD-L complex, Hrd1p ubiquitin ligase ERAD-M complex, luminal surveillance complex localization	0.0471647	-0.107866	2+
1720	orf19.1193	GNP1	Similar to asparagine and glutamine permease; fluconazole, caspofungin induced; regulated by Nrg1, Mig1, Tup1, Gcn2, Gcn4, and alkaline regulated by Rim101; repressed during chlamydospore formation; rat catheter, flow model biofilm induced	0.120991	0.0202051	0+
1060	orf19.1204		Phosphorylated protein of unknown function; transcript is upregulated clinical isolates from HIV positive patients with oral candidiasis	-0.003208	-0.0504933	0+
3519	orf19.121	ARC18	Putative ARP2/3 complex subunit; mutation confers hypersensitivity to cytochalasin D	-0.0986658	0.554973	3+
1747	orf19.1220	RVS167	SH3-domain- and BAR domain-containing protein involved in endocytosis; null mutant exhibits defects in hyphal growth, virulence, cell wall integrity, and actin patch localization; cosediments with phosphorylated Myo5p	-0.0161042	0.940359	2+
1084	orf19.1224	FRP3	Putative ammonium transporter; upregulated in the presence of human neutrophils; fluconazole-downregulated; repressed by nitric oxide; Spider biofilm induced	0.373657	0.423182	0+
2987	orf19.1235	HOM3	Putative L-aspartate 4-P-transferase; fungal-specific (no human or murine homolog); regulated by Gcn2 and Gcn4; early-stage flow model biofilm induced	-0.192497	0.088924	4+
2986	orf19.1236		Ortholog(s) have role in endocytosis, establishment or maintenance of actin cytoskeleton polarity, vacuole organization and integral to Golgi membrane localization	-0.0382589	0.412638	3+
1736	orf19.1249		Ortholog(s) have 1-(5-phosphoribosyl)-5-[(5-phosphoribosylamino)methylideneamino]imidazole-4-carboxamide isomerase activity, role in histidine biosynthetic process and cytosol, nucleus localization	-0.051673	-0.12379	0
1700	orf19.125	EBP1	NADPH oxidoreductase; interacts with phenolic substrates (17beta-estradiol); possible role in estrogen response; induced by oxidative, weak acid stress, NO, benomyl, GlcNAc; Cap1, Mnl1 induced; Hap43-repressed; rat catheter biofilm induced	-0.166879	-0.139225	1+
3814	orf19.1250		Ortholog(s) have role in maturation of SSU-rRNA from tricistronic rRNA transcript (SSU-rRNA, 5.8S rRNA, LSU-rRNA) and cytoplasm, nucleolus localization	-0.173568	0.175847	NA
3041	orf19.1264	CFL2	Oxidoreductase; iron utilization; Sfu1/Sef1/Hap43/Nrg1/Tup1/Rim101 regulated; alkaline/low iron/fluphenazine/ciclopirox olamine, flucytosine, fluconazole, Spider/flow model/rat catheter biofilm induced; caspofungin/amphotericin B repressed	-0.0211188	-0.0968971	3+
2767	orf19.1270	FRE3	Protein with similarity to ferric reductase Fre10p; possibly an essential gene, disruptants not obtained by UAU1 method	-0.0284059	-0.184285	0+
2362	orf19.1275	GAT1	GATA-type transcription factor; regulator of nitrogen utilization; required for nitrogen catabolite repression and utilization of isoleucine, tyrosine and tryptophan N sources; required for virulence in a mouse systemic infection model	0.224708	0.123476	2+
2915	orf19.1285		Plasma membrane-localized protein of unknown function; Hap43p-repressed gene	0.744869	0.352324	0+
940	orf19.1289	SCT1	Putative glycerol-3-phosphate O-acyltransferase; fungal-specific (no human or murine homolog)	0.0180494	-0.124417	1+
2683	orf19.1291	ABZ1	Ortholog(s) have 4-amino-4-deoxychorismate synthase activity, role in para-aminobenzoic acid biosynthetic process and cytosol, nucleus localization	-0.129383	-0.0142273	0+
1390	orf19.1306		Ortholog(s) have cytosol, nucleus localization	-0.448027	0.243354	1+
1062	orf19.1308		Predicted membrane transporter, member of the drug:proton antiporter (14 spanner) (DHA2) family, major facilitator superfamily (MFS)	-0.018648	-0.0539239	0+
2845	orf19.1310		Ortholog(s) have role in nucleotide-excision repair and nucleus localization	0.00216225	0.0531332	1+
2368	orf19.1311	SPO75	Ortholog(s) have role in ascospore wall assembly	0.239974	0.431682	1+
1925	orf19.1324	RAD2	Ortholog of S. cerevisiae Rad2, a nucleotide excision repair nuclease; null mutant is extremely sensitive to UV irradiation; transcript induced by interaction with macrophages	-0.0155837	-0.11034	0+
1424	orf19.1325	ECM38	Putative gamma-glutamyltransferase; alkaline upregulated; Spider biofilm induced; possibly an essential gene, disruptants not obtained by UAU1 method	-0.256342	-0.229096	0+
2392	orf19.1333	SNG3	Putative membrane transporter; Hap43p-induced gene; mutation confers hypersensitivity to toxic ergosterol analog; shows colony morphology-related gene regulation by Ssn6p	-0.131079	-0.140076	0+
3739	orf19.1339	CPY1	Carboxypeptidase Y; transcript regulated at yeast-hypha transition or macrophage response; induced human neutrophils; regulated by Gcn2 and Gcn4; putative N-glycosylation	0.00198216	-0.1134	NA
2332	orf19.1341	PRR2	Putative serine/threonine protein kinase; mutation confers resistance to 5-fluorocytosine (5-FC)	-0.172483	-0.139562	0+
3823	orf19.1354	UCF1	Upregulated by cAMP in filamentous growth; induced in high iron, decreased upon yeast-hypha switch; downregulation correlates with clinical fluconazole resistance; Ras1-regulated; Hap43-repressed; flow model biofilm induced	-0.0362817	-0.147878	NA
2685	orf19.1357	FCY21	High affinity, high capacity, hypoxanthine-adenine-guanine-cytosine/H+ symporter; similar to S. cerevisiae Fcy2; mutation confers resistance to 5-fluorocytosine (5-FC); flow model biofilm induced	-0.071405	-0.167092	3+
981	orf19.136		Predicted membrane transporter, member of the drug:proton antiporter (12 spanner) (DHA1) family, major facilitator superfamily (MFS); Hap43p-repressed gene	0.0353462	-0.23099	1+
1962	orf19.1362	SMM1	Putative dihydrouridine synthase; Hap43-induced gene; rat catheter biofilm induced; Spider biofilm induced	-0.0973863	-0.225274	1+
1963	orf19.1363		Putative protein of unknown function; Plc1-regulated; transcript induced by Mnl1 under weak acid stress; flow model, rat catheter, Spider biofilm induced	0.0443687	0.0215089	0+
1013	orf19.1364		Ortholog of S. pombe Stm1 G-protein coupled receptor; PQ-loop domains; constitutive expression independent of MTL or white-opaque status; Hap43-repressed	0.138622	-0.120883	0+
1357	orf19.1365		Putative monooxygenase; mutation confers hypersensitivity to toxic ergosterol analog; constitutive expression independent of MTL or white-opaque status	-0.0219448	-0.00555478	2+
2455	orf19.1366		Has domain(s) with predicted oxidoreductase activity, acting on paired donors, with incorporation or reduction of molecular oxygen, 2-oxoglutarate as one donor, and incorporation of one atom each of oxygen into both donors activity	0.025852	0.0996938	4+
980	orf19.137		Putative transferase involved in phospholipid biosynthesis; induced by alpha pheromone in SpiderM medium	0.151859	0.233609	0+
1856	orf19.1375	LEU42	Putative alpha-isopropylmalate synthase; fungal-specific; induced by human blood or polymorphonuclear cells; regulated by Gcn2 and Gcn4; stationary phase enriched protein; Spider biofilm induced	-0.147277	-0.181327	0+
2405	orf19.1381		Ortholog of S. cerevisiae/S. pombe Lsb5; predicted role in actin cortical patch localization, actin filament organization, endocytosis; flow model biofilm induced; Spider biofilm repressed	-0.177117	0.0820542	0+
2913	orf19.1382	YEA4	Putative uridine diphosphate-N-acetylglucosamine (UDP-GlcNAc) transporter; required for cell wall chitin synthesis; induced by alpha pheromone in SpiderM medium	-0.0428558	0.650476	0+
2758	orf19.1388		Putative 66S pre-ribosomal particle component; Hap43-induced; F-12/CO2 early biofilm induced	-0.0610116	0.119121	0+
1113	orf19.1394		Putative protein of unknown function; mutant is viable; protein level decreases in stationary phase cultures; Spider biofilm induced	-0.222725	-0.106577	0+
1971	orf19.1395		Ortholog(s) have inorganic phosphate transmembrane transporter activity, role in phosphate ion transport, transmembrane transport and mitochondrion localization	-0.128452	-0.0347584	0+
1974	orf19.1404		Predicted tRNA dihydrouridine synthase; Spider biofilm induced	0.0660522	-0.0398525	3.5+
2510	orf19.1421		Ortholog(s) have ureidoglycolate hydrolase activity and cytosol, nucleus localization	-0.0853159	-0.11451	4+
3121	orf19.1422	FZO1	Putative mitochondrial biogenesis protein; rat catheter and Spider biofilm induced	0.0718613	-0.11857	3+
2511	orf19.1427		Putative transporter; fungal-specific; Spider biofilm induced	-0.0971356	-0.123526	0+
1545	orf19.144	SNU114	Protein similar to S. cerevisiae Snu114p, which is an RNA helicase involved in pre-mRNA splicing; likely to be essential for growth, based on an insertional mutagenesis strategy	0.0336801	0.501991	4+
2676	orf19.1442	PLB4.5	Phospholipase B; Hog1-induced; regulated by Ssn6; putative GPI-anchor; repressed during cell wall regeneration; clade-associated gene expression; Hap43-induced; rat catheter and Spider biofilm repressed	-0.000105046	-0.0794327	0+
3733	orf19.1444		Ortholog(s) have phosphatidylinositol-4,5-bisphosphate binding activity, role in actin cortical patch assembly, actin filament organization, endocytosis and actin cortical patch, mating projection tip localization	-0.143644	0.0665246	NA
2069	orf19.1445	ESC4	Protein similar to S. cerevisiae Esc4; a protein that represses transposition; transposon mutation affects filamentation; rat catheter biofilm repressed	-0.119567	0.044171	0+
1182	orf19.1446	CLB2	B-type mitotic cyclin (cyclin-dependent protein kinase regulatory subunit); essential; required for wild-type mitotic exit; role in cell polarization; interacts with catalytic subunit Cdk1; Spider biofilm repressed	-0.16089	3.21503	4+
2068	orf19.1449		Protein of unknown function; induced in azole-resistant strain that overexpresses MDR1; protein present in exponential and stationary growth phase yeast cultures; Spider biofilm induced	-0.0395301	-0.179093	0+
2067	orf19.1462	SMP2	Putative Mg2+-dependent phosphatidate phosphatase; transcript regulated by Nrg1	-0.0896598	0.102341	0
2573	orf19.1465		Has domain(s) with predicted N-acetyltransferase activity and role in metabolic process	0.0409477	-0.146343	0+
2066	orf19.1468		Ortholog(s) have protein phosphatase type 2A regulator activity	0.0836824	0.515388	0
1198	orf19.147	YAK1	Predicted serine-threonine protein kinase; involved in hyphal growth regulation and biofilm formation; flow model biofilm induced; induced in core caspofungin response	-0.0956408	0.33756	1+	Y
2065	orf19.1477		Protein of unknown function; possible ER protein; Hap43p-repressed; Spider biofilm induced	-0.273318	-0.0991643	0
3785	orf19.1479		Ortholog of the mitochondria localized S. cerevisiae Pib2 protein of unknown function; has a FYVE zinc finger domain; Spider biofilm induced	-0.11591	-0.171005	NA
1555	orf19.1480		Putative succinate dehydrogenase; enzyme of citric acid cycle; repressed by nitric oxide; Efg1, Hap43 repressed	0.199198	0.0895194	3+
1183	orf19.1490	MSB2	Mucin family adhesin-like protein; cell wall damage sensor; required for Cek1 phosphorylation by cell wall stress; Rim101-repressed; activation releases extracellular domain into medium; Spider biofilm induced	0.886866	0.291051	0+	Y
3382	orf19.1493	RAD7	Protein similar to S. cerevisiae Rad7p, which is a subunit of the Nucleotide Excision Repair Factor 4; induced under hydroxyurea treatment	0.116646	-0.117292	2+
2869	orf19.1504		Putative patatin-like phospholipase; fungal-specific (no human or murine homolog)	-0.13569	-0.0550712	0+
2897	orf19.1509	ROD1	Protein similar to S. cerevisiae Rod1;a membrane protein with a role in drug tolerance; repressed by Rgt1; mutant is viable	0.229711	0.412419	0+
2671	orf19.151	TPO5	Putative polyamine transporter; mutation confers hypersensitivity to toxic ergosterol analog; hyphal induced; macrophage induced	-0.0313087	0.0741536	0+
2670	orf19.151	TPO5	Putative polyamine transporter; mutation confers hypersensitivity to toxic ergosterol analog; hyphal induced; macrophage induced	0.103341	-0.231337	0+
1781	orf19.1517	ARO3	3-deoxy-D-arabinoheptulosonate-7-phosphate synthase; aromatic amino acid biosynthesis; GCN-regulated; feedback-inhibited by phenylalanine if expressed in S. cerevisiae; Aro3p and Aro4p catalyze same reaction; decreased in stationary phase	0.206922	0.294772	0+
2696	orf19.1523	FMO1	Putative oxidoreductase; mutation confers hypersensitivity to toxic ergosterol analog, and to amphotericin B	0.301114	-0.124224	3+
3787	orf19.1528		Putative mitochondrial RNA polymerase specificity factor; possibly an essential gene, disruptants not obtained by UAU1 method	-0.0103459	0.122301	NA
693	orf19.1531		Ortholog(s) have RNA binding, protein heterodimerization activity, role in mRNA cleavage, mRNA polyadenylation and mRNA cleavage factor complex, mitochondrion localization	-0.0978025	0.62106	4+
3788	orf19.1533		Possible vacuolar protein; Hap43-induced gene	-0.205114	0.132746	NA
3734	orf19.1536		Putative vacuolar transporter; Hap43-induced; required for normal filamentous growth; mRNA binds She3 and is localized to hyphal tips	-0.0208681	0.151321	NA
2352	orf19.1538	TLG2	Putative syntaxin-like t-SNARE; macrophage/pseudohyphal-repressed	0.0154035	0.00171967	1+
2512	orf19.1545		Ortholog(s) have structural constituent of ribosome activity and mitochondrial small ribosomal subunit localization	-0.0754062	-0.57225	3+
1145	orf19.1548		Ortholog(s) have role in mRNA splicing, via spliceosome and U4/U6 x U5 tri-snRNP complex localization	-0.115437	0.15069	4+
3123	orf19.1555	SAC3	Putative nuclear pore-associated protein, required for small ribosomal subunit biogenesis; possibly an essential gene, disruptants not obtained by UAU1 method	-0.0856392	0.361733	3+
3124	orf19.1559	HOM2	Aspartate-semialdehyde dehydrogenase; forms a homodimer; conserved in bacteria, archaea, and fungi but not in mammals; ketoconazole-repressed; protein present in exponential and stationary growth phase yeast cultures; GlcNAc-induced protein	0.170543	0.660369	4+
1137	orf19.1564		Plasma membrane-localized protein of unknown function	-0.131987	-0.126438	1+
2513	orf19.1567		Ortholog(s) have Rab guanyl-nucleotide exchange factor activity, phosphatidylinositol binding activity	0.109954	-0.0391569	4+
1970	orf19.1575	PRS1	Phosphoribosylpyrophosphate synthetase; enzyme of purine, pyrimidine, histidine, and tryptophan biosynthesis; essential; flucytosine induced; macrophage/pseudohyphal-induced	-0.0204772	0.129986	4+
1969	orf19.1576		Ortholog(s) have nuclear localization sequence binding, ubiquitin binding activity, role in response to ethanol and cytosol localization	-0.205469	0.021769	0+
1015	orf19.158		Ortholog of S. cerevisiae Apd1; required for normal localization of actin patches and normal tolerance of sodium ions and hydrogen peroxide; Hap43-induced; Spider biofilm induced	0.0447286	-0.0867482	2+
1438	orf19.1580		Protein of unknown function; Spider biofilm induced	-0.455502	0.321482	0+
2457	orf19.1582		Predicted membrane transporter; member of the drug:proton antiporter (12 spanner) (DHA1) family, major facilitator superfamily (MFS); mRNA binds She3	-0.0866587	-0.0333237	NA
1968	orf19.1585	ZRT2	Zinc transporter; ciclopirox olamine, fluconazole, alkaline repressed; transcript induced by amphotericin B, interaction with macrophages; possibly essential (UAU1 method); induced in oralpharyngeal candidiasis; Spider biofilm induced	-0.0767055	-0.0660296	2+
1437	orf19.1586	FGR22	Putative phosphatidylinositol-specific phospholipase C (PI-PLC); predicted type 2 membrane protein; no S. cerevisiae ortholog; role in, and regulated by, filamentation, Hap43p; almost identical to orf19.5797	-0.0667537	-0.0275127	0+
1045	orf19.1587	HGT20	Putative glucose transporter of the major facilitator superfamily; the C. albicans glucose transporter family comprises 20 members; 12 probable membrane-spanning segments; regulated by Nrg1	-0.729821	-0.020932	0+
1283	orf19.1606		Protein of unknown function; Plc1-regulated	0.325903	0.063367	0+
1374	orf19.1608		Ortholog(s) have cytosol, nucleus localization	0.144675	0.515594	1+
1597	orf19.1614	MEP1	Ammonium permease; Mep1 more efficient permease than Mep2, Mep2 has additional regulatory role; 11 predicted transmembrane regions; low mRNA abundance; hyphal downregulated; flow model biofilm induced	-0.0456035	0.246258	0+
4054	orf19.1632		Ortholog(s) have cytosol, nucleus localization	0.326449	0.298892	NA
4269	orf19.1634		Has domain(s) with predicted fatty-acyl-CoA binding activity	0.193089	0.0295298	NA
2514	orf19.1637		Ortholog(s) have cytosol, nucleus localization	0.0260018	-0.0164327	0+
2669	orf19.1639		Has domain(s) with predicted oxidoreductase activity and role in oxidation-reduction process	0.0800033	0.00322522	0+
3126	orf19.1641		Ortholog(s) have cytosol, nucleus localization	-0.0114853	-0.0832209	0+
1239	orf19.1648	RAD50	Putative DNA double-strand break repair factor; involved in response to oxidative stress and drug resistance	-0.000920957	-0.0343755	0+
2326	orf19.1658		Ortholog(s) have cell cortex, cellular bud neck, mating projection tip localization	-0.0142235	0.309274	0+
2016	orf19.1659	ALG8	Putative glucosyltransferase involved in cell wall mannan biosynthesis; transcription is elevated in nik1 and sln1 homozygous null mutants, but not in the chk1 null mutant; possibly an essential gene, disruptants not obtained by UAU1 method	-0.0777187	0.00159055	0+
2710	orf19.166	ASG1	Gal4p family zinc-finger transcription factor with similarity to S. cerevisiae Asg1p	-0.100652	-0.139943	0+
708	orf19.1661	DBP5	Ortholog(s) have RNA helicase activity, RNA-dependent ATPase activity, inositol hexakisphosphate binding activity and role in mRNA export from nucleus, translational termination	0.257522	0.699357	4+
3042	orf19.1663	MNT2	Alpha-1,2-mannosyl transferase; adds 3rd mannose in cell-wall mannoprotein biosynthesis; partially redundant with Mnt1; role in adherence and virulence; expressed in yeast and hyphae; fungal-specific; Hap43-induced; Spider biofilm induced	0.12703	0.141018	0+
1446	orf19.1664		Protein of unknown function; expression downregulated in an ssr1 null mutant	0.0986568	0.0267972	2+
3043	orf19.1665	MNT1	Alpha-1,2-mannosyl transferase; predicted type II Golgi membrane protein; adds 2nd mannose during cell-wall mannoprotein biosynthesis; required for wild-type virulence and adherence to epithelial cells; Hap43-induced	-0.0130439	0.0943357	0+
2471	orf19.1667		Protein with a predicted SWI/SNF-related matrix-associated actin-dependent regulator of chromatin subfamily domain; Hap43-repressed gene	-0.0182033	-0.0793422	0+
1219	orf19.1671	UTR2	Putative GPI anchored cell wall glycosidase; role in adhesion, hyphal growth on Spider (not serum) medium; chitin-binding, glycosyl hydrolase domains; induced during cell wall regeneration; mRNA in yeast-form cells; Spider biofilm induced	0.0965379	0.474313	2+
2344	orf19.1675		Ortholog(s) have role in positive regulation of catalytic activity	-0.110208	0.0696876	0+
4058	orf19.1681		Ortholog of C. parapsilosis CDC317 : CPAR2_503590, Candida tenuis NRRL Y-1498 : CANTEDRAFT_115755, Debaryomyces hansenii CBS767 : DEHA2D15334g and Candida dubliniensis CD36 : CD36_81530	0.278763	0.306785	NA
1492	orf19.1682		Membrane protein; Hap43p-repressed gene; repressed by nitric oxide	-0.234018	-0.248198	4+
2404	orf19.1686		Ortholog(s) have mitochondrion localization	0.139033	-0.228987	1+
2829	orf19.169	CHO2	Putative phosphatidyl-ethanolamine N-methyltransferase; fungal-specific (no human or murine homolog); amphotericin B repressed; Hap43p-induced gene	0.0143349	0.102688	2+
2838	orf19.1698		Ortholog(s) have role in actin cytoskeleton organization and actin cortical patch localization	0.0639807	-0.126651	0+
2839	orf19.1699	BZZ1	Protein similar to S. cerevisiae Bzz1p, which is an SH3 domain protein involved in the regulation of actin polymerization	-0.15385	0.0585462	0+
1395	orf19.1709		Sterol carrier domain protein; alkaline downregulated; colony morphology-related gene regulation by Ssn6; Spider biofilm induced	-0.013097	0.16962	0+
1187	orf19.171	DBP2	Putative DEAD-box family ATP-dependent RNA helicase; flucytosine induced; repressed in core stress response	0.26411	1.24809	4+
2437	orf19.1719	SGA1	Putative glucoamylase; induced in oralpharyngeal candidasis; rat catheter and Spider biofilm induced	0.0311981	-0.107375	1+
2436	orf19.1723		Ortholog(s) have role in response to purine-containing compound and cytoplasm, nucleus localization	-0.168017	-0.0794964	2+
3749	orf19.1734		Putative ATPase and nucleosome spacing factor; heterozygous null mutant displays sensitivity to virgineone	-0.248477	0.197211	NA
1652	orf19.1747	KIP2	Putative kinesin-related motor protein involved in mitotic spindle positioning; repressed by alpha pheromone in SpiderM medium; periodic mRNA expression, peak at cell-cycle G2/M phase	0.120706	0.0655342	0+
1127	orf19.1756	GPD1	Glycerol-3-phosphate dehydrogenase; glycerol biosynthesis; regulated by Efg1; regulated by Tsa1, Tsa1B under H2O2 stress conditions; Sflow model and Spider biofilm induced	-0.0638687	-0.169693	1+
2706	orf19.176	OPT4	Oligopeptide transporter; detected at germ tube plasma membrane; transcript inducede during phagocytosis by macrophages; fungal-specific; Hap43-repressed; merged with orf19.2292 in Assembly 20; rat catheter and Spider biofilm induced	-0.00177182	0.0990971	3+
1842	orf19.1760	RAS1	RAS signal transduction GTPase; regulates cAMP and MAP kinase pathways; role in hyphal induction, virulence, apoptosis, heat-shock sensitivity; nonessential; plasma membrane-localized; complements viability of S. cerevisiae ras1 ras2 mutant	0.00477237	-0.209927	0+
2908	orf19.1763	IFR1	Predicted oxidoreductase/dehydrogenase; induced by nitric oxide; rat catheter and Spider biofilm induced	-0.180486	0.165652	0+
4103	orf19.1773	RAP1	Transcription factor; binds telomeres and regulatory sequences in DNA; involved in telomere maintenance; represses hyphal growth under yeast-favoring conditions; similar to (but shorter than) S. cerevisiae Rap1	0.117815	-0.0128524	NA
1186	orf19.1792		Ortholog(s) have ubiquitin-protein ligase activity	-0.0705532	0.560381	3+
3414	orf19.1793		Ortholog(s) have phosphatidylinositol binding activity, role in cellular response to nitrogen starvation, piecemeal microautophagy of nucleus and Golgi apparatus, endosome, extrinsic to membrane, fungal-type vacuole localization	0.115478	-0.0329739	0+
1877	orf19.1795	PUF3	Ortholog os S. cerevisiae Puf3; mRNA-binding protein involved in RNA catabolism; mutant is viable	-0.0436778	-0.0209837	1+
2418	orf19.1797		D-arabinose 5-phosphate isomerase; has GutQ domain which is associated with phosphosugar binding; other biofilm induced; rat catheter and Spider biofilm induced; F-12/CO2 early biofilm induced	0.104078	0.0861501	0+
1671	orf19.1800		Protein of unknown function; Spider biofilm induced	-0.0076614	0.030615	0+
1154	orf19.1804		Ortholog(s) have mitochondrion localization	0.0737088	0.0911501	3.5+
1980	orf19.1813	FLC2	Protein involved in heme uptake; putative FAD transporter, similar to S. cerevisiae Flc2p	-0.0474856	-0.132668	0
1784	orf19.1823		Predicted membrane protein; transcript repressed by ciclopirox olamine	-0.018021	-0.0933391	3+
2323	orf19.183	HIS3	Imidazoleglycerol-phosphate dehydratase, enzyme of histidine biosynthesis; functionally complements S. cerevisiae his3-1 mutation; hyphal-induced expression; regulated by Gcn2p and Gcn4p; fungal-specific (no human or murine homolog)	0.0425452	-0.0279393	0+
2408	orf19.1832	FCY23	Putative transporter; Gcn4p-regulated; more similar to S. cerevisiae Tpn1p, which is a vitamin B6 transporter, than to purine-cytosine permeases	0.0436683	-0.163082	3.5+
920	orf19.1836	APN2	Putative class II abasic (AP) endonuclease; flucytosine induced	-0.0624556	0.00775581	0+
3030	orf19.1844		Protein similar to ferric reductase Fre10p	0.093707	-0.0368739	2+
3031	orf19.1847	ARO10	Aromatic decarboxylase; Ehrlich fusel oil pathway of aromatic alcohol biosynthesis; alkaline repressed; protein abundance affected by URA3 expression in CAI-4 strain; Spider biofilm induced	-0.0580204	-0.124688	2+
2000	orf19.1849		Ortholog(s) have U3 snoRNA binding, rRNA binding activity, role in maturation of SSU-rRNA from tricistronic rRNA transcript (SSU-rRNA, 5.8S rRNA, LSU-rRNA) and nucleolus, small-subunit processome localization	-0.0686827	0.190988	0
964	orf19.1853	HHT2	Putative histone H3; farnesol regulated; Hap43-induced; rat catheter and Spider biofilm repressed	-0.0518426	-0.164685	2+
1442	orf19.1857		Putative L-azetidine-2-carboxylic acid acetyltransferase; mutants are viable	-0.149501	0.0170897	0+
3413	orf19.1860.1		Has domain(s) with predicted peptidase activity and role in proteolysis	0.0252706	0.0141672	3.5+
4151	orf19.1862		Possible stress protein; increased transcription associated with CDR1 and CDR2 overexpression or fluphenazine treatment; regulated by Sfu1, Nrg1, Tup1; stationary phase enriched protein; Spider biofilm induced	0.0667205	-0.196399	NA
2062	orf19.1865		S. cerevisiae ortholog Mcs7 has a role in reciprocal meiotic recombination; Spider biofilm repressed	-0.0778697	-0.247538	0
4067	orf19.1866	VMA10	Subunit G of the V1 peripheral membrane domain of the vacuolar H+-ATPase (V-ATPase); involved in vacuolar acidification; rat catheter biofilm repressed	0.530106	0.567803	NA
2061	orf19.1871		Ortholog(s) have structural molecule activity, role in histone exchange and Swr1 complex localization	0.705864	0.413505	0
2059	orf19.1881		Ortholog(s) have 1-acylglycerol-3-phosphate O-acyltransferase activity, 1-acylglycerophosphocholine O-acyltransferase activity, role in glycerophospholipid biosynthetic process and endoplasmic reticulum, ribosome localization	-0.137447	-0.172532	0
1315	orf19.1887		Ortholog(s) have sterol esterase activity, role in sterol metabolic process and integral to membrane, lipid particle localization	-0.042514	-0.209928	1+
2571	orf19.1890		Ortholog(s) have role in medium-chain fatty acid biosynthetic process	-0.359157	-0.304158	0+
2058	orf19.1891	2010-03-31	Vacuolar aspartic proteinase; transcript equivalent in yeast-form and mycelial cells but is elevated at lower growth temperatures; upregulated iby human neutrophils; protein enriched in stationary phase; Spider biofilm induced	-0.171794	-0.202744	0
4070	orf19.1910		Predicted NADH-dependent flavin oxidoreductase; Hap43-repressed gene	-0.255119	-0.121275	NA
1220	orf19.1911	PGA52	GPI-anchored cell surface protein of unknown function; Hap43p-repressed gene; fluconazole-induced; possibly an essential gene, disruptants not obtained by UAU1 method	-0.0398058	-0.152928	0+
1544	orf19.1923	RRN3	Protein with a predicted role in recruitment of RNA polymerase I to rDNA; caspofungin induced; flucytosine repressed; repressed in core stress response; repressed by prostaglandins	0.124964	0.934862	4+
1998	orf19.1936	SNF1	Essential protein; functional homolog of S. cerevisiae Snf1p regulator of sugar metabolism; constitutively expressed; Thr208 phosphorylation may have regulatory role; up-regulation associated with azole resistance; has polyhistidine tract	0.419655	0.684949	0
1997	orf19.1940		Ortholog(s) have role in ubiquinone biosynthetic process and mitochondrial inner membrane localization	0.198356	0.00540777	2+
3389	orf19.1946		Similar to an aldose 1-epimerase-related protein; antigenic during murine systemic infection; protein present in exponential and stationary phase yeast cultures; Hap43-induced; Spider biofilm repressed	0.205842	0.0403964	1+
1648	orf19.1949	VPS1	Dynamin-family GTPase-related protein; induced upon adherence to polystyrene; regulated by Gcn2p and Gcn4p	0.00765269	-0.0376983	2+	Y
1287	orf19.1953		Predicted protein of unknown function; merged with orf19.1952 in Assembly 21	-0.15682	0.103096	1+
2318	orf19.1954	PUS4	Putative pseudouridine synthase; transcript regulated by Nrg1, Mig1, and Tup1	-0.0747669	-0.0426144	0+
896	orf19.1960	CLN3	G1 cyclin; depletion abolishes budding and causes hyphal growth defects; farnesol regulated, functional in S. cerevisiae; possibly essential (UAU1 method); other biofilm induced; Spider biofilm induced	-0.234071	2.09324	4+
1101	orf19.1966	BUD23	Putative methyltransferase; Hap43-induced; repressed by prostaglandins	0.088411	0.34293	3.5+
1279	orf19.1970		Putative vacuole biogenesis protein	0.105998	-0.114989	0+
1608	orf19.1977	URA4	Dihydroorotase; protein present in exponential and stationary growth phase yeast cultures	0.0539064	0.0901877	3.5+
2795	orf19.1978	GIT2	Putative glycerophosphoinositol permease; fungal-specific; repressed by alpha pheromone in SpiderM medium; Hap43-repressed; Spider biofilm induced	0.325602	0.376338	0+
2794	orf19.1979	GIT3	Putative glycerophosphoinositol permease; white cell specific transcript; fungal-specific; alkaline repressed; caspofungin, macrophage/pseudohyphal-repressed; flow model biofilm induced; Spider biofilm induced	0.194665	0.0622899	2+
2793	orf19.1980	GIT4	Putative glycerophosphoinositol permease; fungal-specific (no human or murine homolog); possibly an essential gene, disruptants not obtained by UAU1 method; Hap43p-repressed gene	-0.124571	-0.0984954	0+
2742	orf19.1985		Has aminoglycoside phosphotransferase and protein kinase domains; rat catheter and flow model biofilm induced	-0.00756641	0.0923478	NA
1602	orf19.1986	ARO2	Putative chorismate synthase; fungal-specific (no human or murine homolog); protein level decreased in stationary phase yeast cultures; GlcNAc-induced protein	0.0949272	0.402406	4+
123	orf19.1988	CDC45	Putative DNA replication initiation factor; transcriptionally regulated by interaction with macrophage	-0.0870741	0.254264	3+
3117	orf19.1995	MNN24	Alpha-1,2-mannosyltransferase; required for normal cell wall mannan content	0.164022	-0.0464633	0+
3114	orf19.2003	HNM1	Putative choline/ethanolamine transporter; mutation confers hypersensitivity to toxic ergosterol analog; colony morphology-related gene regulation by Ssn6; clade-associated gene expression	0.20893	0.0286491	0+
2508	orf19.2006		Ortholog(s) have fungal-type vacuole membrane localization	0.0472575	0.0218591	0+
2507	orf19.2007		Ortholog(s) have role in Golgi to vacuole transport, ascospore wall assembly, retrograde transport, endosome to Golgi and GARP complex, mitochondrion localization	-0.345042	-0.0438406	0+
2506	orf19.2008		Ortholog(s) have S-methyl-5-thioribose-1-phosphate isomerase activity, role in L-methionine salvage from methylthioadenosine and cytosol, nucleus localization	-0.0129078	-0.114479	0+
1660	orf19.2016		Ortholog(s) have protein binding, bridging activity, role in ergosterol biosynthetic process and endoplasmic reticulum membrane localization	-0.00677833	-0.0648343	0+
2761	orf19.2019		Ortholog(s) have structural constituent of ribosome activity and mitochondrial large ribosomal subunit localization	-0.14386	-0.239347	3+
2039	orf19.2028	MXR1	Putative methionine sulfoxide reductase; Plc1-regulated; induced by human neutrophils, flucytosine; macrophage regulated (gene induced, protein decreased); possibly adherence-induced; Spider biofilm induced	-0.128517	-0.12743	0+
3889	orf19.203	STB3	Putative SIN3-binding protein 3 homolog; caspofungin induced; macrophage/pseudohyphal-repressed; rat catheter biofilm induced	-0.0426717	-0.338261	NA
2041	orf19.2031	VPS24	Protein similar to S. cerevisiae Vps24p, which is a member of the ESCRT III protein sorting complex; downregulated upon adherence to polystyrene	-0.0701842	-0.0166891	0+
2045	orf19.2043		Has domain(s) with predicted ATP binding, nucleoside-triphosphatase activity	0.233553	-0.142569	1+
2046	orf19.2045		Ortholog(s) have diacylglycerol kinase activity, role in phosphatidic acid biosynthetic process and integral to endoplasmic reticulum membrane localization	-0.059625	-0.209362	0+
2047	orf19.2046	POT1-2	Putative peroxisomal 3-ketoacyl CoA thiolase; Hap43-repressed	0.0392508	-0.0720855	0+
2048	orf19.2050		Ortholog(s) have sterol esterase activity, role in cellular lipid metabolic process, sterol metabolic process and fungal-type vacuole, integral to membrane, lipid particle localization	-0.0331166	-0.0564856	0+
2115	orf19.2055	NPL6	Putative nuclear protein localization factor; Hap43-induced; Spider biofilm repressed	-0.263084	-0.0395052	4+
1460	orf19.2059		Protein with homology to magnesium-dependent endonucleases and phosphatases; regulated by Sef1, Sfu1, and Hap43; Spider biofilm induced	-0.224759	-0.159923	0+
4146	orf19.2060	SOD5	Cu and Zn-containing superoxide dismutase; protects against oxidative stress; induced by neutrophils, hyphal growth, caspofungin, osmotic/oxidative stress; oralpharyngeal candidiasis induced; rat catheter and Spider biofilm induced	-0.0331821	-0.199215	NA
4061	orf19.2064		Putative transcription factor with zinc finger DNA-binding motif	-0.415734	-0.100652	NA
2114	orf19.2065		Ortholog(s) have role in allantoin catabolic process and cytosol, nucleus localization	0.0545162	-0.145689	0+
2113	orf19.2067		Protein with a predicted role in mitochondrial iron metabolism; Hap43-repressed; expression upregulated during growth in the mouse cecum; Spider biofilm induced	0.0836491	-0.168716	0+
2112	orf19.2072		Ortholog(s) have choline transmembrane transporter activity, ethanolamine transmembrane transporter activity and role in choline transport, ethanolamine transport, glycine betaine transport	0.113096	0.0667723	0+
2111	orf19.2073		Protein with a multidrug and toxin extrusion protein domain; induced by Mnl1 under weak acid stress	0.0354324	0.0845721	0+
1222	orf19.2075	DFG5	N-linked mannoprotein of cell wall and membrane; possible signal transducer; role in hyphal growth and HWP1 induction in alkaline pH; GPI modification predicted; dfg5 dcw1 double mutant is inviable; caspofungin-induced, fungal-specific	-0.0772534	-0.0984951	0
2591	orf19.2077	ZCF9	Putative Zn(II)2Cys6 transcription factor; hypersensitive to toxic ergosterol analog ECC69 and/or ECC1384	-0.00234746	-0.0435177	4+
535	orf19.2090		Ortholog of S. cerevisiae Ecm16, an essential DEAH-box ATP-dependent RNA helicase specific to the U3 snoRNP required for 18S rRNA synthesis; Hap43-induced; Spider biofilm induced	0.166101	0.429467	4+
2110	orf19.2092		Putative peroxisomal cystathionine beta-lyase; Gcn4p-regulated	-0.064695	-0.133981	0+
3883	orf19.2094	PDR6	Putative pleiotropic drug resistance regulatory protein 6; transcript regulated by Nrg1; induced by alpha pheromone in SpiderM medium	0.0927478	0.0501241	NA
2109	orf19.2095		Ortholog(s) have role in negative regulation of transcription from RNA polymerase II promoter in response to iron and cytosol, nucleus localization	0.0467283	-0.0548578	3+
2108	orf19.2098	ARO8	Aromatic transaminase of the Ehrlich fusel oil pathway of aromatic alcohol biosynthesis; Rim101 independent alkaline induction; protein abundance affected by URA3 expression in CAI-4 strain; Gcn4-regulated; stationary phase enriched	-0.14523	-0.123992	0+
3897	orf19.2106		Putative protein of unknown function; Hap43p-repressed gene	-0.0314893	-0.0940538	NA
1913	orf19.2107	MUQ1	Putative choline phosphate cytidylyltransferase/phosphoethanolamine cytidylyltransferase; repressed in hyphae compared vs yeast; Hap43-repressed; flow model biofilm induced; Spider biofilm repressed	0.166973	-0.0625971	0+
1264	orf19.2112		snRNP U5 splicing factor component; involved in positioning the 3' splice site during the 2nd catalytic step of splicing; Spider biofilm induced	-0.155169	0.296279	4+
2432	orf19.2113		Putative integral peroxisomal membrane protein; Hap43p-repressed gene	-0.0155158	-0.182166	1+
1419	orf19.2114		Predicted uricase; ortholog of S. pombe SPCC1223.09; Spider biofilm induced	-0.222277	-0.0398808	3+
1912	orf19.2115		Putative molybdopterin-converting factor; fungal-specific (no human or murine homolog)	0.0117019	0.0335235	0+
1911	orf19.2117	LEU5	Putative mitochondrial carrier protein; Hap43-repressed; rat catheter biofilm induced	-0.273001	-0.231644	0
3425	orf19.212	VPS28	ESCRT I protein sorting complex subunit; involved in Rim8 processing and proteolytic activation of Rim101, which regulates pH response; role in echinocandin, azole sensitivity	-0.184565	-0.100145	0+
2327	orf19.2124		Predicted alcohol dehydrogenase; Spider biofilm induced	-0.157245	0.0552445	0+
3010	orf19.2131		Ortholog(s) have ubiquitin-protein ligase activity, role in protein ubiquitination, ubiquitin-dependent protein catabolic process via the multivesicular body sorting pathway and Golgi apparatus, endoplasmic reticulum localization	0.0223916	0.09756	0+
1439	orf19.2133	LIP4	Secreted lipase, member of a differentially expressed lipase gene family with possible roles in nutrition and/or in creating an acidic microenvironment; expressed more strongly during mucosal infections than during systemic infections	0.1607	-0.0071684	0+
3427	orf19.2137		Ortholog(s) have mitochondrion localization	0.030984	0.0617664	0+
3011	orf19.2143		Ortholog(s) have role in endocytic recycling and cytosol, endosome, nucleus localization	-0.0549723	-0.0379777	2+
3012	orf19.2146	HAT2	Putative Hat1-Hat2 histone acetyltransferase complex subunit; role in DNA damage repair and morphogenesis; mutations cause constitutive pseudohyphal growth, caspofungin sensitivity; Spider biofilm repressed	0.0573203	0.0235642	0+
1977	orf19.2149		Putative sulfate permease; S. cerevisiae ortholog YPR003C localizes to the endoplasmic reticulum; regulated by Sef1p-, Sfu1p-, and Hap43p	0.327339	0.258885	0+
1978	orf19.2151	NAG6	Protein required for wild-type mouse virulence and wild-type cycloheximide resistance; putative GTP-binding motif; similar to S. cerevisiae Yor165Wp; in gene cluster that encodes enzymes of GlcNAc catabolism; no human or murine homolog	0.0952192	-0.0946125	3+
1387	orf19.2157	DAC1	N-acetylglucosamine-6-phosphate (GlcNAcP) deacetylase; N-acetylglucosamine utilization; required for wild-type hyphal growth and virulence in mouse systemic infection; gene and protein are GlcNAc-induced; Spider biofilm induced	-0.0757144	-0.0719942	0+
2791	orf19.2158	NAG3	Putative MFS transporter; similar to Nag4; required for wild-type mouse virulence and cycloheximide resistance; in gene cluster that includes genes encoding enzymes of GlcNAc catabolism; Spider biofilm repressed	-0.13281	0.130934	3+
2993	orf19.216		Protein with a metallo-dependent phosphatase domain; ketoconazole-induced; upregulation correlates with clinical development of fluconazole resistance	0.622994	0.50167	0+
2792	orf19.2160	NAG4	Putative transporter; fungal-specific; similar to Nag3p and to S. cerevisiae Ypr156Cp and Ygr138Cp; required for wild-type mouse virulence and wild-type cycloheximide resistance; gene cluster encodes enzymes of GlcNAc catabolism	-0.116543	-0.0756882	2+
4207	orf19.2165		Predicted hydrolase; induced by nitric oxide	0.302888	0.169834	NA
1249	orf19.2166	VMA5	Putative vacuolar H(+)-ATPase; plasma membrane localized	0.047335	0.000994909	3+
1014	orf19.2172	ARA1	D-Arabinose dehydrogenase; dehydro-D-arabinono-1,4-lactone synthesis; active on D-arabinose, L-fucose, L-xylose, L-galactose; inhibited by metal ions, thiol group-specific reagents; induced on polystyrene adherence; Spider biofilm induced	-0.110542	-0.200927	0+
2488	orf19.2175		Putative mitochondrial cell death effector; induced by nitric oxide; Spider biofilm induced; rat catheter biofilm repressed	-0.0977979	0.0608656	0+
2487	orf19.2182	BLM3	Putative proteasome activator; binds core proteasome and stimulates proteasome-mediated protein degradation by inducing gate opening; ortholog of S. cerevisiae Blm10; transcript regulated by Nrg1 and Mig1	0.000550108	-0.096778	0+
2376	orf19.2186		Ortholog(s) have Seh1-associated complex, cytosol, fungal-type vacuole membrane, nuclear membrane, nuclear pore outer ring localization	-0.0526915	0.0334797	0+
1783	orf19.2192	GDH2	Putative NAD-specific glutamate dehydrogenase; fungal-specific; transcript regulated by Nrg1, Mig1, Tup1, and Gcn4; stationary phase enriched protein; flow model biofilm induced; Spider biofilm induced	-0.0382094	0.00382825	0+
1874	orf19.2193	PRS5	Putative 5-phospho-ribosyl-1(alpha)-pyrophosphate synthetase; Hap43-induced; repressed during core stress response	-0.0590921	-0.150848	0+
1873	orf19.2194		Phosphorylated protein of unknown function	-0.0597463	-0.131907	1+
2416	orf19.2197		Has domain(s) with predicted N,N-dimethylaniline monooxygenase activity, NADP binding, flavin adenine dinucleotide binding activity and role in oxidation-reduction process	0.302842	0.187351	0+
2415	orf19.2198	FLC3	Protein involved in heme uptake; putative FAD transporter, similar to S. cerevisiae Flc3p	-0.111302	-0.0151986	0+
3920	orf19.2199	PHO86	Putative endoplasmic reticulum protein; possibly adherence-induced	-0.361353	0.0300528	NA
1794	orf19.2209	YVC1	Putative vacuolar cation channel shock; repressed by alpha pheromone in SpiderM medium	-0.131928	0.079128	0+	Y
1866	orf19.2214		Ortholog(s) have structural constituent of ribosome activity and mitochondrial large ribosomal subunit localization	-0.194836	-0.346211	3+
2689	orf19.2241	PST1	Putative 1,4-benzoquinone reductase; hyphal-induced; regulated by Cyr1, Ras1, Efg1, Nrg1, Rfg1, Tup1; Hap43-induced; Spider biofilm induced	0.208717	-0.0731338	1+
1593	orf19.2242	PRB1	Endoprotease B; regulated by heat, carbon source (GlcNAc-induced), nitrogen, macrophage response, human neutrophils; similar to (does not replace) S. cerevisiae vacuolar B protease Prb1p; flow model biofilm induced; Spider biofilm induced	-2.37581	0.304513	3+
2036	orf19.2246		Ortholog(s) have cytosol, nucleus localization	-0.00980356	-0.0581096	2+
1568	orf19.2248	ARE2	Acyl CoA:sterol acyltransferase; uses cholesterol and oleoyl-CoA substrates; protoberberine derivative drug inhibits enzyme activity; ketoconazole-induced; Hap43-repressed; flow model biofilm induced; Spider biofilm induced	-0.114662	-0.225163	1+
2034	orf19.2251	AAH1	Adenine deaminase; purine salvage and nitrogen catabolism; colony morphology-related regulation by Ssn6; Hog1, CO2-induced; chlamydospore formation repressed in C. albicans and C. dubliniensis; rat catheter and F-12/CO2 biofilm induced	-0.240893	-0.101623	2+
2474	orf19.2264	OLE2	Protein with similarity to fatty acid desaturase (stearoyl-CoA desaturase); homozygous null mutant shows decreased production of prostaglandin E2	-0.0368704	-0.130672	0+
4265	orf19.2266		Ortholog(s) have ATPase activity, DNA binding, nucleosome binding activity, role in chromatin remodeling and ISW1 complex localization	-0.0221429	-0.0525437	NA
2383	orf19.2269		Putative 3-phosphoserine phosphatase; induced by benomyl or in azole-resistant strain that overexpresses MDR1; early-stage flow model biofilm induced; Spider biofilm repressed	-0.0425709	-0.122441	0+
1378	orf19.2281		Has domain(s) with predicted CoA-transferase activity and role in ketone body catabolic process	-0.188916	0.0928978	0+
1379	orf19.2282		Has domain(s) with predicted catechol 1,2-dioxygenase activity, ferric iron binding activity and role in catechol-containing compound metabolic process, oxidation-reduction process	0.0359942	-0.190727	0+
2773	orf19.2284		Protein with an FMN-binding domain; Hap43-repressed; flow model biofilm induced	-0.156833	-0.173216	0+
1381	orf19.2285		Protein of unknown function; transcription induced by benomyl treatment	0.00382061	0.260268	0+
376	orf19.2298	WBP1	Putative oligosaccharyltransferase subunit; Spider biofilm repressed	-0.0583589	0.533025	4+
3053	orf19.23	RTA3	Similar to S. cerevisiae Rta1 (role in 7-aminocholesterol resistance) and Rsb1 (flippase); putative drug-responsive regulatory site; induced by fluphenazine, estradiol, ketoconazole, caspofungin; rat catheter biofilm induced	-0.133925	-0.0900818	0+
4023	orf19.2301		Ortholog(s) have role in proteasome regulatory particle assembly and cytosol, nucleus localization	0.0132805	-0.067022	NA
2464	orf19.2302		Ortholog(s) have enzyme regulator activity, role in cellular calcium ion homeostasis and integral to endoplasmic reticulum membrane localization	0.0245219	-0.00800441	0+
4059	orf19.2303	FGR16	Protein lacking an ortholog in S. cerevisiae; transposon mutation affects filamentous growth; fluconazole-downregulated	-0.217108	0.0442467	NA
3971	orf19.2304		Protein similar to S. cerevisiae Gvp36p; transposon mutation affects filamentous growth	-0.130489	0.0579025	NA
1992	orf19.2306		Ortholog(s) have oxidoreductase activity, acting on single donors with incorporation of molecular oxygen, incorporation of two atoms of oxygen activity and role in L-methionine salvage from methylthioadenosine	0.196854	0.0318072	0
3988	orf19.2308		Putative 6-phosphofructo-2-kinase; catalyzes synthesis of fructose-2,6-bisphosphate; Hap43-repressed; flow model, rat catheter and Spider biofilm induced	-0.0156471	0.100379	NA
3025	orf19.2309		Protein with a predicted role in 5'-end processing of mitochondrial RNAs; ortholog of S. cerevisiae Pet127; Hap43-induced; rat catheter and Spider biofilm induced	-0.0709557	-0.0347246	1+
3024	orf19.2311	RPL82	Predicted ribosomal protein; genes encoding cytoplasmic ribosomal subunits, translation factors, and tRNA synthetases are downregulated upon phagocytosis by murine macrophage	0.13341	0.182494	0+
2463	orf19.2312		Protein similar to ferric reductase Fre10p; possibly an essential gene, disruptants not obtained by UAU1 method	0.0714326	0.00674074	0+
1224	orf19.2330		Putative U3 snoRNA-associated protein; Hap43-induced; transposon mutation affects filamentous growth; repressed by prostaglandins	0.0342783	0.201622	4+
1995	orf19.2333		Ortholog(s) have role in retrograde transport, endosome to Golgi and cytosol, late endosome, nucleus localization	0.0525339	-0.161315	3+
1993	orf19.2337	ALP1	Cystine transporter; present in pathogenic yeasts (no human or murine homolog); Spider biofilm induced	0.052738	0.172481	0+
1955	orf19.234	PHA2	Putative prephenate dehydratase; Hap43p-repressed gene; expression downregulated in an ssr1 null mutant	-0.171305	0.198377	0+
1158	orf19.2341	HNT1	Protein with similarity to protein kinase C inhibitor-I; protein level decreases in stationary phase cultures	0.00447317	-0.147295	0+
4062	orf19.2343	VPS23	ESCRT I protein sorting complex protein; involved in proteolytic activation of Rim101, which regulates pH response; ortholog of S. cerevisiae Stp22/Vps23	0.280681	0.240435	NA
2406	orf19.2346		Putative protein of unknown function, transcription is positively regulated by Tbf1p	-0.0168812	0.000433982	3+
1862	orf19.2347	MNN2	Alpha-1,2-mannosyltransferase; similar to S. cerevisiae Mnn2; role in cell wall integrity, temperature sensitivity; iron utilization in low iron; Tn mutation affects filamentous growth; filament induced; increased chitin exposes beta-glucan	0.103825	-0.0889693	0+
1524	orf19.2350		Protein similar to S. cerevisiae Yor378w; MFS family transporter; transposon mutation affects filamentous growth; null mutants are viable; fungal-specific (no human or murine homolog)	-0.12323	-0.132459	0+
1860	orf19.2352		Ortholog(s) have mitochondrion localization	-0.00457972	-0.078026	0+
3938	orf19.2363		Ortholog(s) have thiosulfate sulfurtransferase activity and mitochondrion localization	-0.0678314	0.0504822	NA
2325	orf19.238	CCP1	Similar to cytochrome-c peroxidase N terminus; repressed by Rim101 or alkaline pH; transcript induced by interaction with macrophage or low iron; oxygen-induced activity; regulated by Sef1, Sfu1, and Hap43; Spider biofilm induced	-0.0214172	-0.117456	1+
2390	orf19.2384		Putative mitochondrial GTPase; likely essential for respiratory competence and in large ribosomal subunit assembly; mitochondrial translation; Spider biofilm induced	0.120299	-0.110494	1+
3407	orf19.2385	KTI12	Protein similar to S. cerevisiae Kti12p, which associates with Elongator complex; has a role in resistance to killer toxin; predicted Kex2p substrate; Hap43p-induced gene	-0.0569043	-0.00519775	3+
3406	orf19.2391		Putative protein of unknown function; Hap43p-repressed gene; S. cerevisiae ortholog YKR023W localizes to mitochondria	-0.0467897	-0.105131	3+
2884	orf19.2394		Ortholog(s) have cytoplasm, nucleus localization	-0.0611601	-0.02099	0+
2883	orf19.2396	IFR2	Zinc-binding dehydrogenase; induced by benomyl, ciclopirox olamine or alpha pheromone; regulated by oxidative stress via Cap1 and osmotic stress via Hog1; protein present in exponential and stationary phase; Hap43-induced	-0.209874	0.0222737	0+
1807	orf19.2397		Predicted membrane transporter, member of the anion:cation symporter (ACS) family, major facilitator superfamily (MFS); amphotericin B, caspofungin repressed; Hap43p-repressed	-0.385741	-0.582611	2+
2476	orf19.24	RTA2	Putative flippase; sphingolipid long chain base release; mediates calcineurin-dependent resistance to azoles; stress-associated protein; Ca2+, calcineurin-regulated; ketoconazole, caspofungin induced; Plc1-regulated; Spider biofilm induced	-0.120985	0.0936988	2+
2360	orf19.240	PAM17	Predicted component of the presequence translocase-associated import motor (PAM complex) involved in protein import into mitochondrial matrix	-0.0744117	-0.054513	0+
4004	orf19.2400		Ortholog(s) have role in mRNA splicing, via spliceosome, maturation of SSU-rRNA, positive regulation of ATPase activity, positive regulation of helicase activity	-0.139634	-0.146905	NA
2450	orf19.2411		Putative endosomal SNARE; role in protein transport; rat catheter and Spider biofilm induced	0.0349512	-0.15704	0+
1953	orf19.2415		Ortholog(s) have role in mitochondrial translation and mitochondrion localization	-0.00558359	-0.0968622	0+
1170	orf19.2416.1	MLC1	Microtubule-dependent localized protein; at Spitzenkorper and cytokinetic ring in hyphae; cell-cycle dependent localization to tip polarisome, bud neck in yeast and pseudohyphae; sumoylation target; rat catheter, Spider biofilm repressed	-0.206723	-0.0366877	3+
4099	orf19.2418		Ortholog of C. parapsilosis CDC317 : CPAR2_802530, Candida tenuis NRRL Y-1498 : CANTEDRAFT_109615, Debaryomyces hansenii CBS767 : DEHA2A12650g and Candida dubliniensis CD36 : CD36_28190	-0.67475	-0.0978213	NA
1952	orf19.2423	ZCF11	Zn(II)2Cys6 transcription factor; required for wild-type filamentous growth; mRNA binds She3	-0.041137	0.0375307	0+
1951	orf19.2425	HGT18	Putative glucose transporter of the major facilitator superfamily; the C. albicans glucose transporter family comprises 20 members; 12 probable membrane-spanning segments; expressed in rich medium with 2% glucose	-0.0875688	-0.176316	0+
1950	orf19.2426		Predicted HD domain metal dependent phosphohydrolase; Spider biofilm repressed	-0.00387726	-0.176107	0+
1532	orf19.2434	NPL4	Putative ubiquitin-binding protein; regulated by Gcn2p and Gcn4p	0.543332	0.64658	1+
1798	orf19.2436		Predicted protein serine/threonine kinase; Spider biofilm induced	-0.0428925	-0.0105601	0+
1799	orf19.2438		Ortholog(s) have mitochondrion, ribosome localization	0.76853	1.04166	3+
4327	orf19.2439		Fatty acid biosynthetic protein; shows colony morphology-related gene regulation by Ssn6p; protein newly produced during adaptation to the serum	-0.189363	-0.210045	NA
1050	orf19.2443	RGD1	GTPase activator protein; transcript induced in low iron; alkaline upregulated; localized to the bud emergence area in G1 phase and in the bud tip during S and G2 phases	0.0398052	-0.0822063	2+
1800	orf19.2444	CHS7	Protein required for wild-type chitin synthase III activity; similar to (but not functional homolog of) S. cerevisiae Chs7p, which effects ER export of Chs3p; induced cyr1 mutant hyphae and ras1 yeast-form cells; Spider biofilm induced	-0.0916101	0.158883	0+
1801	orf19.2445		Putative dicarboxylic amino acid permease; fungal-specific (no human or murine homolog); induced by alpha pheromone in SpiderM medium	0.00884599	-0.0996926	1+
1642	orf19.2446		Ortholog(s) have cell division site, cell tip, cytoplasm, nucleus localization	-0.127308	-0.130059	0+
1096	orf19.2454	PHO87	Putative phosphate permease; transcript repressed by Rim101 at pH 8; regulated by white-opaque switch; caspofungin repressed; virulence-group-correlated expression; flow model biofilm induced	-0.0979927	-0.0753631	1+
2660	orf19.2458		Protein of unknown function; flow model, rat catheter and Spider biofilm induced	-0.0244007	-0.171354	0+
2667	orf19.246		Predicted metalloendopeptidase; Spider biofilm induced	0.0171325	0.0320797	0+
1430	orf19.2461	PRN4	Protein with similarity to pirins; increased transcription is observed upon benomyl treatment	0.0839958	-0.132214	1+
1429	orf19.2462	PRN3	Protein similar to pirin; induced by Mnl1 under weak acid stress; Hap43-repressed; Spider biofilm induced	0.0904389	-0.0304601	3+
1428	orf19.2463	PRN2	Protein similar to pirin; Hap43p-repressed gene	0.00210922	-0.0551355	0+
1427	orf19.2467	PRN1	Protein with similarity to pirins; induced by benomyl and in response to alpha pheromone in SpiderM medium; transcript induced by Mnl1 in weak acid stress; rat catheter and Spider biofilm induced	0.20499	-0.114618	0+
3760	orf19.2468		Ortholog(s) have trans-aconitate 3-methyltransferase activity and cytosol, nucleus localization	0.167573	0.0356488	NA
3761	orf19.2474	PRC3	Putative carboxypeptidase Y precursor; transcript regulated by Nrg1 and Mig1; regulated by Gcn2 and Gcn4	-0.0478041	0.000170359	NA
1276	orf19.2481		Protein of unknown function; Spider biofilm induced	-0.0781601	0.0789305	0+
3436	orf19.2496	ATO2	Putative fungal-specific transmembrane protein; fluconazole repressed, Hap43-repressed; flow model biofilm induced; Spider biofilm induced	-0.247509	0.0651688	0+
2477	orf19.25		Ortholog(s) have tRNA (guanine) methyltransferase activity, role in tRNA methylation and cytoplasm, nucleolus localization	-0.00298601	0.24502	1+
1135	orf19.250	SLC1	Putative fatty acyltransferase; protein repressed during the mating process	0.0474174	-0.110901	3+
1179	orf19.2510		Ortholog(s) have role in protein folding, tubulin complex assembly	-0.114211	-0.172286	3.5+
1405	orf19.2514		Predicted methyltransferase; rat catheter biofilm induced	-0.0251195	-0.00835138	0+
2333	orf19.2517		Predicted membrane transporter, member of the drug:proton antiporter (12 spanner) (DHA1) family, major facilitator superfamily (MFS)	0.0620617	-0.122775	0+
932	orf19.2534	PIN4	Protein with similarity to S. cerevisiae Pin4p; transposon mutation affects filamentous growth	-0.185792	0.309093	0+
3762	orf19.2538	PTC2	Protein phosphatase of the Type 2C-related family (serine/threonine-specific) with a potential role in DNA damage checkpoint control; localizes to both cytoplasm and mitochondria; mutant shows virulence defect	0.0770132	0.286503	NA
2353	orf19.2541		Ortholog(s) have 3'-5'-exodeoxyribonuclease activity, endonuclease activity, role in apoptotic DNA fragmentation, cellular response to oxidative stress and cytosol, nucleus localization	0.0937339	-0.127348	0+
1684	orf19.2546	TRP2	Putative anthranilate synthase with a predicted role in tryptophan biosynthesis; regulated by Gcn2p and Gcn4p	0.251404	0.201075	4+
1622	orf19.2551	MET6	Essential 5-methyltetrahydropteroyltriglutamate-homocysteine methyltransferase (cobalamin-independent methionine synthase); antigenic in murine/human systemic infection; heat shock, estrogen, GCN-induced; Spider biofilm repressed	-0.350895	0.266549	4+
1366	orf19.2553		Protein similar to S. cerevisiae Pmr1p; amphotericin B induced; previously merged with orf19.2552 in Assembly 20; unmerged from orf19.2552 in a revision of Assembly 21	0.213269	0.163586	3+
1822	orf19.2555	URA5	Putative orotate phosphoribosyltransferase; protein abundance is affected by URA3 expression in the CAI-4 strain background; flucytosine induced; protein level decreased in stationary phase cultures	-0.160235	0.0881094	3+
3404	orf19.2563		Ortholog(s) have U6 snRNA binding activity, role in assembly of spliceosomal tri-snRNP, spliceosomal complex assembly and U6 snRNP localization	-0.00867513	0.0372087	3+
4104	orf19.2564		Ortholog(s) have role in ribosomal small subunit biogenesis and nucleolus, ribosome localization	0.100098	0.292779	NA
1900	orf19.2574		Ortholog(s) have Golgi apparatus localization	0.489759	-0.631386	0+
3421	orf19.2575		Putative S-adenosylmethionine-dependent methyltransferase; Hap43p-induced gene	0.0395881	-0.043285	2+
1902	orf19.2580	HST2	Putative histone deacetylase; role in regulation of white-opaque switch; Spider biofilm induced	-0.0693071	-0.0237414	0+
1903	orf19.2583	PTR2	Oligopeptide transporter involved in uptake of di-/tripeptides; highly induced during chlamydospore formation in both C. albicans and C. dubliniensis	-0.124889	-0.130775	1+
2478	orf19.26		Putative peptide N-glycanase; induced by nitric oxide independent of Yhb1p	0.0930263	-0.0752622	2+
1361	orf19.260	SLD1	Sphingolipid delta-8 desaturase; catalyzes desaturation at C8 in the long-chain base moiety of ceramides in glucosylceramide synthesis, important for virulence; ketoconazole and hypoxia induced; Hap43-repressed; Spider biofilm induced	0.0885481	-0.0959408	0+
210	orf19.2600	SPC98	Putative component of the microtubule-nucleating Tub4p (gamma-tubulin) complex; periodic mRNA expression, peak at cell-cycle S/G2 phase	-0.259832	0.999793	1+
1845	orf19.2601	HEM1	Putative 5-aminolevulinate synthase; caspofungin repressed; induced by high iron, nitric oxide; regulated by Ssn6; Hap43-repressed; Spider biofilm induced	-0.000585414	0.0238553	4+
2875	orf19.2602	OPT1	Oligopeptide transporter; transports 3-to-5-residue peptides; alleles are distinct, one has intron; suppresses S. cerevisiae ptr2-2 mutant defects; induced by BSA or peptides; Stp3p, Hog1p regulated; flow model biofilm induced	-0.10136	-0.0669531	3+
1327	orf19.2607		Protein of unknown function; Spider biofilm induced	0.108865	0.0502243	0
2409	orf19.2608	ADH5	Putative alcohol dehydrogenase; regulated by white-opaque switch; fluconazole-induced; antigenic in murine infection; regulated by Nrg1, Tup1; Hap43, macrophage repressed, flow model biofilm induced; Spider biofilm induced	-0.164949	0.0874361	0+	Y
1302	orf19.2618	MET2	Homoserine acetyltransferase; Hap43p-, Gcn4p-regulated; macrophage/pseudohyphal-repressed; not highly biofilm induced, in contrast to many sulfur amino acid metabolic genes; no human or murine homolog; virulence-group-correlated expression	0.0544551	0.153379	4+
1177	orf19.2622	YPT31	Protein required for resistance to toxic ergosterol analog	-0.200372	0.292452	4+
2335	orf19.2637		Ortholog(s) have Golgi apparatus, fungal-type vacuole membrane localization	0.384329	0.169512	0+
1823	orf19.2640	FUR1	Uracil phosphoribosyltransferase; predicted tetrameric enzyme of pyrimidine salvage; mutations associated with flucytosine resistance in clade I clinical isolates; flucytosine, macrophage-induced protein; levels decrease in stationary phase	0.151906	0.161417	0+
2389	orf19.2644	QCR2	Ubiquinol-cytochrome-c reductase; antigenic; induced by interaction with macrophage; repressed by nitric oxide; in detergent-resistant membrane fraction (possible lipid raft component); levels decrease in stationary phase; Hap43p-repressed	0.404135	-0.147856	3+
4147	orf19.2653		Protein with a transient receptor potential (TRP) ion channel domain; mutants are viable; rat catheter and Spider biofilm induced	0.131635	0.275795	NA
2718	orf19.2655	BUB3	Protein similar to S. cerevisiae Bub3; a kinetochore checkpoint component; induced by hydroxyurea treatment; flow model biofilm induced; Spider biofilm induced	0.0630229	0.066095	2+
3824	orf19.2660	EAF3	Subunit of the NuA4 histone acetyltransferase complex; rat catheter and Spider biofilm induced	-0.100789	0.0143224	NA
3894	orf19.2665	MSN5	Predicted karyopherin involved in nuclear import and export of proteins; flow model biofilm induced; Spider biofilm induced	0.582969	0.928162	NA
3385	orf19.2665	MSN5	Predicted karyopherin involved in nuclear import and export of proteins; flow model biofilm induced; Spider biofilm induced	0.154236	0.455332	0+
4074	orf19.2671		Protein with a predicted FAD-dependent pyridine nucleotide reductase domains; putative oxidoreductase; Plc1-regulated; possibly an essential gene, disruptants not obtained by UAU1 method	-0.138802	-0.178078	NA
3026	orf19.2678	BUB1	Putative cell cycle checkpoint kinase; mutation confers increased sensitivity to nocodazole	-0.223168	0.0938529	3+
2960	orf19.2681	RBT7	Protein with similarity to RNase T2 enzymes; has putative secretion signal; expression is Tup1-repressed	-0.215707	-0.124339	0+
1194	orf19.2690		Putative mitochondrial GTPase; required for mitochondrial morphology and genome maintenance; Spider biofilm induced	-0.136544	-0.131679	1+
1985	orf19.2693	GST2	Glutathione S transferase; induced by benomyl and in populations of cells exposed to fluconazole over multiple generations; regulated by Nrg1, Tup1; induced by nitric oxide; stationary phase enriched; Spider biofilm induced	-0.0813957	-0.0622466	0+
2462	orf19.2695	UBR1	Protein similar to S. cerevisiae Ubr1p ubiquitin-protein ligase; transposon mutation affects filamentous growth; Spider biofilm induced	0.130641	-0.028748	0+
1986	orf19.2703		Specificity factor required for ubiquitination and sorting of specific cargo proteins at the multivesicular body; ortholog of S. cerevisiae Ear1; transcript regulated by iron; Ssr1-represssed; Spider biofilm induced	-0.0110644	-0.112161	0+
1212	orf19.2706	CRH11	GPI-anchored cell wall transglycosylase, putative ortholog of S. cerevisiae Crh1p; predicted glycosyl hydrolase domain; similar to Csf4p and to antigenic A. fumigatus Aspf9; predicted Kex2p substrate; caspofungin-induced	1.25556	0.870351	4+
3763	orf19.2709	ZUO1	Ortholog of S. cerevisiae Zuo1; a cytosolic ribosome-associated chaperone; likely to be essential for growth, based on an insertional mutagenesis strategy; Spider biofilm repressed	0.0424737	0.742495	NA
4180	orf19.273		Ortholog(s) have unfolded protein binding activity, role in sterol biosynthetic process and endoplasmic reticulum localization	-0.0980544	0.308127	NA
1906	orf19.2738	SUL2	Putative sulfate transporter; transcript negatively regulated by Sfu1; amphotericin B induced; F-12/CO2 and Spider biofilm induced	-0.0936204	-0.00862088	0+
1268	orf19.2747	RGT1	Zn(II)2Cys6 transcription factor; transcriptional repressor involved in the regulation of glucose transporter genes; ortholog of S. cerevisiae Rgt1; mutants display decreased colonization of mouse kidneys	0.12947	-0.107523	0+
2803	orf19.2749		BTB/POZ domain protein; induced by Mnl1 under weak acid stress; flow model biofilm induced; Spider biofilm induced	0.0656401	-0.162719	0+
3765	orf19.2751		Predicted membrane transporter; member of the monocarboxylate porter (MCP) family, major facilitator superfamily; Hap43-induced gene; alkaline upregulated by Rim101; possibly an essential gene, disruptants not obtained by UAU1 method	-0.27387	0.0945538	NA
2872	orf19.2753	ZCF15	Predicted Zn(II)2Cys6 transcription factor of unknown function; rat catheter biofilm induced	-0.107716	0.0512453	0+
1530	orf19.2755		Ortholog(s) have role in proteasomal ubiquitin-dependent protein catabolic process, proteasomal ubiquitin-independent protein catabolic process and cytosol, nucleus, proteasome core complex, beta-subunit complex localization	-0.00450747	0.539814	4+
2434	orf19.277	THI6	Putative thiamin-phosphate pyrophosphorylase, hydroxyethylthiazole kinase; fungal-specific; Spider biofilm induced	0.217047	0.000713263	0+
2527	orf19.2771	BEM3	Putative GTPase-activating protein (GAP) for Rho-type GTPase Cdc42p; involved in cell signaling pathways that control cell polarity; similar to S. cerevisiae Bem3p	-0.0177622	-0.0621162	0+
2526	orf19.2772	HOS3	Histone deacetylase; similar to S. cerevisiae Hos3p; greater expression and longer mRNA in white cells, compared to opaque cells; has conserved deacetylation motif	-0.167317	-0.164095	0+
3778	orf19.2781		Protein with predicted serine/threonine kinase and tyrosine kinase domains; possibly an essential gene, disruptants not obtained by UAU1 method; Spider biofilm induced	0.375268	-0.152654	NA
3779	orf19.2782		Ortholog(s) have disulfide oxidoreductase activity, role in cellular response to oxidative stress, response to osmotic stress and mitochondrial matrix localization	-0.160176	-0.156536	NA
2887	orf19.2791	BBC1	Putative SH3-domain-containing protein	-0.0763464	0.162434	0+
1531	orf19.2792	IST2	Ortholog(s) have lipid binding activity and cellular bud membrane, endoplasmic reticulum localization	0.0364315	0.108378	0+
1815	orf19.2798		Putative helicase; fungal-specific (no human or murine homolog)	-0.136871	0.278631	0+
3054	orf19.28		Putative thiamine transmembrane transporter; Spider biofilm induced	-0.0962397	-0.0428945	2+
352	orf19.2803	HEM13	Coproporphyrinogen III oxidase; antigenic; on yeast cell surface, not hyphae; iron-regulated expression; Hap43, macrophage-repressed; farnesol-induced; possibly essential; flow model biofilm induced; rat catheter, Spider biofilm repressed	-0.036605	0.0816793	3+
1889	orf19.2810	AAP1	Putative amino acid permease; fungal-specific; possibly essential, disruptants not obtained by UAU1 method; Spider biofilm induced	0.225762	-0.0102614	0+
1362	orf19.2821		Protein of unknown function; Hap43-repressed gene; repressed by nitric oxide	-0.229191	-0.217831	3.5+
1180	orf19.2828		Ortholog(s) have alpha-tubulin binding, microtubule binding activity, role in post-chaperonin tubulin folding pathway and cytosol, nucleus localization	0.104315	0.0748434	1+
1414	orf19.2838		Protein of unknown function; mutation confers hypersensitivity to amphotericin B; flow model biofilm induced	0.103434	-0.0192448	2+
2937	orf19.2839	CIRT4B	Cirt family transposase; transcript repressed in an azole-resistant strain that overexpresses CDR1 and CDR2; Hap43-repressed; flow model biofilm induced	-0.307367	-0.0451616	1+
1370	orf19.2842	GZF3	GATA-type transcription factor; oxidative stress-induced via Cap1; mutant has abnormal colony morphology and altered sensitivity to fluconazole, LiCl, and copper; Spider biofilm induced	-0.306167	-0.131609	0+	Y
1928	orf19.2844		Predicted gamma-adaptin, large subunit of the clathrin-associated protein (AP-1) complex; that binds clathrin and is involved in vesicle mediated transport; induced in core caspofungin response	-0.00664232	0.184104	0+
2969	orf19.2848		Predicted regulatory subunit of the Atg1 signaling complex; required for vesicle formation during autophagy and the cytoplasm-to-vacuole targeting (Cvt) pathway; Spider biofilm induced	-0.0718783	-0.0370888	0+
459	orf19.2857		Ortholog(s) have ATP-dependent DNA helicase activity	-0.243449	0.697963	4+
926	orf19.2862	RIB1	Putative GTP cyclohydrolase II; enzyme of riboflavin biosynthesis; fungal-specific (no human or murine homolog); regulated by Sef1p-, Sfu1p-, and Hap43p	-0.129741	0.123384	4+
1878	orf19.2871	SDH12	Succinate dehydrogenase; soluble protein in hyphae; macrophage-downregulated protein level; downregulated by Efg1p; repressed by nitric oxide; protein present in exponential and stationary growth phase yeast cultures; Hap43p-repressed gene	0.00583758	0.141244	2+
2419	orf19.2875		Ortholog of S. pombe SPAC1071.09c DNAJ domain protein; Hap43-induced gene	-0.0942543	-0.0424525	0+
2420	orf19.2876	CBF1	Transcription factor; binds ribosomal protein gene promoters and rDNA locus with Tbf1; regulates sulfur starvation-response, respiratory, glycolytic genes; does not bind to centromeres as does S. cerevisiae Cbf1; Spider biofilm repressed	0.0510998	0.15882	3+
3415	orf19.2881	MNN4	Regulator of mannosylphosphorylation of N-linked mannans to cell wall proteins; no role in virulence or normal interaction with macrophages; mutant induces inflammatory cytokines in dendritic cells; rat catheter and Spider biofilm induced	0.0384782	0.108048	1+
1392	orf19.2882	XUT1	Putative high-affinity, high-capacity xanthine-uric acid/H+ symporter; similar to A. nidulans UapA; member of the Nucleobase-Ascorbate Transporter/Nucleobase-Cation Symporter (NAT/NCS2) family; rat catheter biofilm induced	-0.110513	-0.168388	0+
919	orf19.2886	CEK1	ERK-family protein kinase; required for wild-type yeast-hypha switch, mating efficiency, virulence in mice; Cst20-Hst7-Cek1-Cph1 MAPK pathway regulates mating, and invasive hyphal growth under some conditions; Spider biofilm induced	-0.17702	-0.0485382	3+
3921	orf19.2887		Ortholog in S. cerevisiae is localizedto the bud, mating projection tip, and associates with ribosomes; Spider biofilm induced	0.0393261	-0.0527527	NA
3067	orf19.2908		Predicted oxidoreductase; rat catheter biofilm induced	-0.0312789	-0.14991	1+
1166	orf19.2921		Ortholog(s) have alpha-tubulin binding activity, role in protein folding, tubulin complex assembly and cytosol, nucleus localization	0.344348	0.552077	3.5+
1257	orf19.2926		Putative nuclease required for DNA single- and double-strand break repair; rat catheter biofilm induced	0.120205	0.10033	0+
59	orf19.2929	GSC1	Essential beta-1,3-glucan synthase subunit; gsc1 allele determines resistance/sensitivity to echinocandins; 16 predicted membrane-spanning regions; mRNA abundance declines after yeast-to-hypha transition; Spider biofilm induced	0.0197282	0.640411	4+	Y
2890	orf19.2930		Predicted translation initiation factor; role in translational initiation; Spider biofilm repressed	0.00223616	0.218793	0+
3858	orf19.2934		Similar to S. cerevisiae Bud20; predicted role in cellular bud site selection; rat catheter and Spider biofilm induced	0.492358	0.162049	NA
1833	orf19.2939		Ortholog(s) have mitochondrion localization	-0.0585075	-0.0578862	1+
1218	orf19.2941	SCW4	Putative cell wall protein; substrate for Kex2p processing in vitro; expression regulated by white-opaque switch; alkaline repressed; possibly essential (UAU1 method); flow model biofilm induced; Spider biofilm induced	-0.0971031	0.143551	0+
1835	orf19.2942	DIP5	Dicarboxylic amino acid permease; mutation confers hypersensitivity to toxic ergosterol analog; induced upon phagocytosis by macrophage; Gcn4-regulated; upregulated by Rim101 at pH 8; rat catheter and Spider biofilm induced	-0.0117176	0.0306572	0+
1834	orf19.2942	DIP5	Dicarboxylic amino acid permease; mutation confers hypersensitivity to toxic ergosterol analog; induced upon phagocytosis by macrophage; Gcn4-regulated; upregulated by Rim101 at pH 8; rat catheter and Spider biofilm induced	0.0436234	-0.0117284	0+
3155	orf19.2945	PUT4	Putative proline permease; fungal-specific (no human or murine homolog); repressed during the mating process	0.181386	0.363165	3.5+
2536	orf19.2946	HNM4	Putative choline permease; fungal-specific (no human or murine homolog)	-1.01534	-0.0379872	2+
2535	orf19.2947	SNZ1	Stationary phase protein; vitamin B synthesis; induced byyeast-hypha switch, 3-AT or in azole-resistant strain overexpressing MDR1; soluble in hyphae; regulated by Gcn4, macrophage; Spider biofilm induced; rat catheter biofilm repressed	-0.0701418	-0.0104039	0+
2534	orf19.2948	SNO1	Protein with a predicted role in pyridoxine metabolism; stationary phase protein; regulated by Tup1, Efg1; Spider biofilm induced	0.0999124	-0.0276009	0+
2533	orf19.2951	HOM6	Putative homoserine dehydrogenase; Gcn4p-regulated; induced in response to amino acid starvation (3-ATtreatment); macrophage-induced protein; protein level decreases in stationary phase cultures	0.0802313	-0.149797	3.5+
2532	orf19.2952	EXG2	GPI-anchored cell wall protein, similar to S. cerevisiae exo-1,3-beta-glucosidase Exg2p; predicted Kex2p substrate; induced during cell wall regeneration; possibly an essential gene, disruptants not obtained by UAU1 method; Hap43p-repressed	-0.143646	-0.0440414	3+
3441	orf19.2953	TOM20	Putative mitochondrial primary import receptor	0.0186596	0.022766	3+
2531	orf19.2956	MGM101	Putative mitochondrial genome maintenance protein; fungal-specific (no human or murine homolog); mutation confers hypersensitivity to tubercidin (7-deazaadenosine)	-0.0656122	-0.0557757	3+
4185	orf19.2958		Planktonic growth-induced gene	0.114979	0.248408	NA
4056	orf19.2961		Putative transcription factor with zinc finger DNA-binding motif	0.148719	-0.0499889	NA
1578	orf19.2964		Ortholog(s) have DNA translocase activity	-0.180079	-0.112088	4+
1146	orf19.2965		Putative guanyl-nucleotide exchange factor; Spider biofilm repressed	0.0163643	0.0339338	3+
2530	orf19.2966		Predicted dienelactone hydrolase domain; clade-associated gene expression; farnesol-downregulated; rat catheter biofilm repressed	0.0162369	-0.161744	0+
3970	orf19.297	DTD2	Ortholog(s) have D-leucyl-tRNA(Leu) deacylase activity, D-tyrosyl-tRNA(Tyr) deacylase activity, role in D-leucine catabolic process, D-tyrosine catabolic process and cytosol, nucleus localization	0.107739	0.010438	NA
1661	orf19.2970	LYS2	Large subunit of heterodimeric alpha-aminoadipate reductase; lysine biosynthesis; predicted binding sites for AMP and alpha-aminoadipate; feedback inhibited by lysine or thialysine; regulated by Gcn2 and Gcn4; Spider biofilm induced	0.119403	-0.175239	4+
4060	orf19.2973		Ortholog(s) have RNA binding, flap-structured DNA binding activity and role in nuclear-transcribed mRNA poly(A) tail shortening, positive regulation of endodeoxyribonuclease activity	0.0513812	-0.0792985	NA
3038	orf19.2977	MIA40	Predicted component of the mitochondrial intermembrane space import machinery; Hap43p-repressed gene	0.199979	-0.176773	3+
2469	orf19.2983	CDC73	Putative transcription elongation factor; cdc73 kap114 double transposon mutation affects filamentous growth; Spider biofilm repressed	-0.0652614	0.0206947	0+
2015	orf19.2984	MST1	Ortholog(s) have role in mitochondrial threonyl-tRNA aminoacylation and mitochondrion localization	-0.0548551	-0.0973428	2+
2014	orf19.2987		Ortholog(s) have role in cellular ion homeostasis, mitochondrion inheritance, regulation of cardiolipin metabolic process and mitochondrial inner membrane, nucleus localization	-0.071338	-0.027622	1+
2468	orf19.2988		Predicted aminotransferase based on S. pombe ortholog SPBC660.12c; flow model biofilm induced	0.0169132	0.304222	1+
1870	orf19.299	ECM14	Ortholog(s) have role in fungal-type cell wall organization and endoplasmic reticulum, fungal-type vacuole localization	-0.0695282	-0.00566268	0+
1215	orf19.2990	XOG1	Exo-1,3-beta-glucanase; 5 glycosyl hydrolase family member; affects sensitivity to chitin and glucan synthesis inhibitors; not required for yeast-to-hypha transition or for virulence in mice; Hap43-induced; Spider biofilm induced	-0.144199	-0.234788	1+	Y
2440	orf19.2991	HOL1	Putative MFS transporter; regulated by Nrg1; macrophage/pseudohyphal-repressed; induced by alpha pheromone in SpiderM medium; possibly an essential gene, disruptants not obtained by UAU1 method	-0.0125685	-0.052567	0+
3423	orf19.2996		Ortholog(s) have role in fungal-type cell wall organization and cytoplasm localization	0.219857	-0.0682524	0+
2965	orf19.2998	TSR2	Protein with a predicted role in pre-rRNA processing; repressed by prostaglandins	0.0241149	0.314164	3.5+
2412	orf19.300	AIP2	Putative actin interacting protein; regulated by Gcn4p; induced in response to amino acid starvation (3-aminotriazole treatment); repressed in the presence of elevated CO2	-0.0432311	0.0517802	2+
1961	orf19.3003		Putative lipid-binding protein with a predicted role in calcium-dependent phospholipid-binding	0.0863216	-0.17162	1+
1248	orf19.3006		Protein involved in Golgi trafficking; Spider biofilm repressed	-0.0990209	-0.0710521	3.5+
2454	orf19.3010		Putative lipoyl ligase; role in modification of mitochondrial enzymes by attachment of lipoic acid groups; rat catheter biofilm induced	-0.0510607	-0.0277451	0+
3874	orf19.3012	ARO80	Zn(II)2Cys6 transcription factor; transcriptional activator of aromatic amino acid catabolism; regulator of aromatic alcohol biosynthesis via the Ehrlich pathway; mutant is viable	-0.142458	-0.100021	NA
1468	orf19.3016		Ortholog(s) have role in meiotic chromosome segregation and cytosol, nucleus localization	-0.103794	-0.0760873	0+
3888	orf19.3022		Ortholog(s) have structural constituent of ribosome activity and mitochondrial small ribosomal subunit localization	-0.0367257	-0.128456	NA
3263	orf19.3023	NGG1	Ortholog(s) have histone acetyltransferase activity and role in histone acetylation, regulation of transcription from RNA polymerase II promoter	-0.0809175	0.876021	4+
2146	orf19.3029		Predicted 3-hydroxyisobutyryl-CoA hydrolase; mitochondrially localized; Spider biofilm induced	-0.0690789	-0.110108	0+
2147	orf19.3035		Ortholog(s) have ATP-dependent DNA helicase activity, chromatin DNA binding, methylated histone residue binding, rDNA binding activity	0.0765541	-0.0368304	0+
388	orf19.3037		Putative poly(A)-binding protein; regulated by Gcn4p; induced in response to amino acid starvation (3-AT treatment); protein present in exponential and stationary growth phase yeast cultures	0.0279588	0.539503	4+
2148	orf19.3038	TPS2	Trehalose-6-phosphate (Tre6P) phosphatase; mutant heat sensitive, accumulates Tre6P, decreased mouse virulence; possible drug target; 2 conserved phospohydrolase motifs; no mammalian homolog; Hap43-repressed; flow model biofilm induced	0.0152304	0.3116	0+
1882	orf19.304		Putative transporter similar to MDR proteins; fungal-specific; Spider biofilm induced	0.0333773	0.170312	3+
1341	orf19.3042		Protein of unknown function; Hap43-induced; rat catheter biofilm induced	-0.0178302	-0.0713717	2+
2149	orf19.3047		Protein kinase-related protein, required for normal sensitivity to caspofungin	0.142243	0.353431	0+
2150	orf19.3049		Ortholog(s) have protein kinase activity, role in activation of bipolar cell growth, ascospore wall assembly, protein phosphorylation and cell division site, cytosol, nucleus, prospore membrane localization	0.0436503	0.00255451	2+
1263	orf19.3050	AGE1	Putative GTPase activator; induced in low iron	-0.00100949	0.0564653	0+
3468	orf19.3051		Protein of unknown function; S. pombe ortholog SPAC17A2.02c plays a role in resistance to cadmium; colony morphology-related gene regulation by Ssn6; Spider biofilm repressed	-0.0606581	-0.159024	0+
1057	orf19.3064	MRPL27	Putative 60S ribosomal protein L27, mitochondrial precursor	0.218216	-0.158046	3.5+
2596	orf19.3065	DAO1	Putative D-amino acid oxidase; transcription is regulated upon yeast-hyphal switch	0.139264	0.0151554	0+
2151	orf19.3066	ENG1	Endo-1,3-beta-glucanase; ortholog of S. cerevisiae Dse4 required for cell separation; caspofungin, fluconazole repressed; fungal-specific; repressed by alpha pheromone in SpiderM medium; flow model biofilm induced	0.164119	0.240798	0+
3987	orf19.307		Ortholog(s) have transcription coactivator activity, role in histone acetylation, transcription from RNA polymerase II promoter and Ada2/Gcn5/Ada3 transcription activator complex, SAGA complex, SLIK (SAGA-like) complex localization	0.863272	2.01147	NA
1169	orf19.3071	MIH1	Putative protein phosphatase of the PTP family (tyrosine-specific); ortholog of S. cerevisiae Mih1; mRNA binds She3	0.0925878	1.06141	0+
1509	orf19.308		Ortholog(s) have role in nucleobase-containing compound transport and plasma membrane localization	0.203554	-0.173275	2+
71	orf19.3083		Putative lipid phosphatase of the endoplasmic reticulum; role in DNA repair, actin cytoskeleton organization, cellular manganese ion homeostasis; Spider biofilm repressed	0.00414108	-0.218153	0+
684	orf19.3086		Ortholog(s) have role in Golgi to plasma membrane transport, cytokinetic cell separation, exocytosis and cell cortex of cell tip, cell division site, cytosol, exocyst, mating projection tip, nucleus, spindle pole body localization	0.0304162	0.389546	4+
1816	orf19.3089		Predicted mitochondrial intermembrane space protein; predicted role in phospholipid metabolism; rat catheter and Spider biofilm induced	-0.00513735	-0.0459234	2+
2934	orf19.309	DAL5	Allantoate permease; nitrogen catabolite repressed, induced in absence of preferred N sources; nitrogen source regulation requires Gat1; possibly essential gene (by UAU1 method); Hap43-repressed	-0.0590098	-0.14788	0+
3194	orf19.3099	TRP4	Predicted enzyme of amino acid biosynthesis; upregulated in biofilm; regulated by Gcn2p and Gcn4p; S. cerevisiae ortholog is Gcn4p regulated	-0.0768131	0.185808	4+
1559	orf19.3100		Protein with t-SNARE domains and a microtubule associated domain; Hap43-induced gene; repressed by alpha pheromone in SpiderM medium	0.240402	0.319588	4+
2563	orf19.3106	MET16	Putative 3'-phosphoadenylsulfate reductase; sulfur amino acid metabolism; reports differ on regulation during biofilm formation; fungal-specific; possibly an essential gene, disruptants not obtained by UAU1 method; Hap43p-repressed gene	-0.16947	0.00202797	3+
3192	orf19.3111	PRA1	Cell surface protein that sequesters zinc from host tissue; enriched at hyphal tips; released extracellularly; binds to host complement regulators; mediates leukocyte adhesion and migration; immunogenic in mouse; produced at ambient pH	0.0772464	-0.0561122	3.5+
2562	orf19.3112	ZRT1	Putative zinc transporter; acts with Pra1 in sequestration of zinc from host tissues during infection; hyphal, macrophage-induced; alkaline induced upon adherence to polystyrene; induced in oralpharyngeal candidasis; Spider biofilm induced	-0.0177973	0.0609129	0+
2561	orf19.3121	GST1	Putative glutathione S-transferase; upregulated in the presence of human neutrophils; expression is regulated upon white-opaque switching; increased transcription is observed upon benomyl treatment	-0.0590603	-0.109934	0+
2560	orf19.3122	ARR3	ortholog of S. cerevisiae Arr3; arsenite transporter of the plasma membrane required for resistance to arsenic compounds; benomyl-induced; Gcn4-regulated; Hap43-repressed; mutant is viable; Spider biofilm induced	0.104955	-0.0480975	0+
2559	orf19.3124		Ortholog(s) have mRNA binding, metalloaminopeptidase activity, role in negative regulation of gene expression, protein initiator methionine removal involved in protein maturation and cytosolic ribosome, nucleolus localization	-0.10561	0.256492	1+
1535	orf19.3126	CCT6	Putative cytosolic chaperonin Cct ring complex subunit; mutation confers hypersensitivity to cytochalasin D; GlcNAc-induced protein; Spider biofilm repressed	-0.139542	0.551302	4+
970	orf19.313	DAL4	Putative allantoin permease; fungal-specific (no human or murine homolog)	-0.0483333	-0.22165	0+
2030	orf19.3131	OYE32	NAD(P)H oxidoreductase family protein; induced by nitric oxide, amphotericin B, oxidative stress via Cap1; upregulation associated with MDR1 overexpression or benomyl treatment; macrophage-downregulated protein; Spider biofilm induced	-0.311325	-0.177544	0+
2033	orf19.3139		Putative NADP-dependent oxidoreductase; Hap43-repressed; induced by benomyl treatment; oxidative stress-induced via Cap1; rat catheter biofilm repressed	-0.311998	-0.0819923	0+
1443	orf19.314		Ortholog of S. cerevisiae : STB6, C. glabrata CBS138 : CAGL0L05016g, C. parapsilosis CDC317 : CPAR2_103210, Candida tenuis NRRL Y-1498 : CANTEDRAFT_133418 and Debaryomyces hansenii CBS767 : DEHA2G08382g	-0.00365383	-0.156635	0+
3770	orf19.3142		Ortholog of C. parapsilosis CDC317 : CPAR2_501210, Candida tenuis NRRL Y-1498 : CANTEDRAFT_97195, Debaryomyces hansenii CBS767 : DEHA2E08800g and Candida dubliniensis CD36 : CD36_46140	0.122004	0.64608	NA
2728	orf19.3149	LSP1	Eisosome component with a predicted role in endocytosis; protein present in exponential and stationary growth phase yeast cultures; caspofungin repressed; biofilm induced; fungal-specific (no human/murine homolog); sumoylation target	-0.0194283	0.00719192	0+
2342	orf19.3151		Has domain(s) with predicted catalytic activity, coenzyme binding, nucleotide binding activity and role in cellular metabolic process	-0.200073	-0.241308	3+
1368	orf19.3152	AMO2	Protein similar to A. niger predicted peroxisomal copper amino oxidase; mutation confers hypersensitivity to toxic ergosterol analog; F-12/CO2 early biofilm induced	-0.275723	-0.0638029	0+
4087	orf19.3170		Ortholog(s) have role in formation of translation preinitiation complex and cytoplasm, cytosolic ribosome localization	0.288455	-0.0533246	NA
2330	orf19.3173		Ortholog(s) have Golgi apparatus, endoplasmic reticulum localization	0.3819	0.223045	0+
196	orf19.3174	CDC24	GDP-GTP exchange factor for Cdc42p; phosphorylated; required for maintenance of hyphal growth; misexpression blocks hyphal growth and causes avirulence in a mouse model of systemic infection; antigenic during human oral infection	0.0461329	0.22385	3.5+
1612	orf19.3175		Putative ortholog of human electron transfer flavoprotein dehydrogenase (ETF-dH); alkaline repressed; repressed by nitric oxide; virulence-group-correlated expression; Spider biofilm induced	0.303843	0.383362	0+
3963	orf19.3176	RIM21	Plasma membrane pH-sensor involved in the Rim101 pH response pathway; required for processing and activation of Rim101 and for alkaline pH-induced hyphal growth; Spider biofilm induced	0.0584518	0.304818	NA
1233	orf19.3177		Ortholog(s) have 2,5-diamino-6-ribitylamino-4(3H)-pyrimidinone 5'-phosphate deaminase activity, pseudouridine synthase activity, role in riboflavin biosynthetic process, tRNA pseudouridine synthesis and cytosol localization	0.50965	0.307316	3+
2663	orf19.318		Ortholog(s) have role in iron-sulfur cluster assembly and mitochondrial matrix localization	-0.014899	-0.095126	2+
2929	orf19.3203	RCY1	Putative F-box protein involved in endocytic membrane traffic and/or recycling; fungal-specific (no human or murine homolog)	0.132742	0.472814	3+
1880	orf19.3207	CCN1	G1 cyclin; required for hyphal growth maintenance (not initiation); cell-cycle regulated transcription (G1/S); Cdc28p-Ccn1p initiates Cdc11p S394 phosphorylation on hyphal induction; expression in S. cerevisiae inhibits pheromone response	0.482512	0.537248	0+
2928	orf19.3208	DAL52	Putative allantoate permease; mutant is viable; similar but not orthologous to S. cerevisiae Dal5	0.727734	0.646627	2+
4333	orf19.3213		Protein of unknown function; Spider biofilm induced	-0.600065	0.211261	NA
2371	orf19.3219		Ortholog of S. cerevisiae Sia1; involved in activation of the Pma1 plasma membrane H+-ATPase by glucose in S. cerevisiae; Spider biofilm induced	0.572285	0.178237	0+
1626	orf19.3222		Predicted vacuolar protein; rat catheter biofilm repressed	-0.127915	-0.116061	0+
3634	orf19.3226		Ortholog(s) have role in intracellular sterol transport and fungal-type vacuole lumen localization	0.134205	-0.0397422	0+
2364	orf19.3227	FTH2	Putative iron transporter; similar to S. cerevisiae Fth1p	-0.0809531	0.125383	3.5+
1253	orf19.3228		Putative endosomal transmembrane protein; Hap43p-induced; mutation confers hypersensitivity to amphotericin B	-0.388844	-0.318723	2+
1175	orf19.3230	BOI2	Putative SH3-domain-containing protein; mutation confers hypersensitivity to toxic ergosterol analog; Spider biofilm induced	-0.346796	0.126451	0+
2610	orf19.3232		Putative transporter; mutation confers hypersensitivity to toxic ergosterol analog; fungal-specific (no human or murine homolog)	-0.150373	0.0424947	3.5+
3299	orf19.3237		Ortholog(s) have cytosol, mitochondrion, nucleus localization	-0.0508256	-0.209381	0+
505	orf19.3240	ERG27	3-Keto sterol reductase of ergosterol biosynthesis; acts in C-4 sterol demethylation with Erg25p and Erg26p; possible drug target, essential for viability; functional homolog of S. cerevisiae Erg27p	-0.0607758	0.0823959	4+
3476	orf19.3247		Putative ortholog of S. cerevisiae Laa1p; likely to be essential for growth, based on an insertional mutagenesis strategy	-0.143564	0.150606	3.5+
4027	orf19.3263	ATO10	Putative fungal-specific transmembrane protein; rat catheter and Spider biofilm induced	0.132878	0.0463064	NA
2612	orf19.3267		Ortholog(s) have palmitoyltransferase activity and role in ascospore wall assembly, cortical actin cytoskeleton organization, establishment of cell polarity, protein palmitoylation, regulation of exocytosis, vacuole fusion, non-autophagic	0.167505	-0.0947861	0+
1104	orf19.3273		Ortholog(s) have actin monomer binding, protein kinase inhibitor activity, ribosome binding activity, role in negative regulation of protein phosphorylation and cytoplasm, nucleus, polysome, ribosome localization	0.028857	0.107196	2+
4046	orf19.3282	BMT3	Beta-mannosyltransferase; adds 2nd beta-mannose to the acid-stable fraction of cell wall phosphopeptidomannan, elongation of beta-mannose chains on the phosphopeptidomannan acid-labile fraction; Hap43-induced; Spider biofilm induced	0.338522	0.0649824	NA
1371	orf19.3290		Plasma membrane-localized protein; repressed by nitric oxide; Hap43p-repressed gene	0.105219	-0.107041	2+
1072	orf19.3292		Ortholog(s) have peptide-methionine (R)-S-oxide reductase activity, role in cellular response to oxidative stress and cytosol, mitochondrion, nucleus localization	-0.0878445	0.00832816	1+
2080	orf19.3298	CCH1	Voltage-gated Ca2+ channel of the high affinity calcium uptake system; roles in thigmotropism, establishment of galvanotropism; transcript regulated by Nrg1 and Mig1	-0.181002	-0.144348	0
1176	orf19.330.1	RUB1	Ubiquitin-related protein with similarity to mammalian NEDD8; reversible conjugation (neddylation) of the cullin subunit (Cdc53p) modulates the ubiquitin ligase activity of the SCF complexes	0.111135	0.172872	0+
3451	orf19.3302		Putative type-1 protein phosphatase targeting subunit; transcript repressed by yeast-hyphal switch; transcript induced by Mnl1p under weak acid stress; flow model biofilm induced	-0.0639111	-0.0466443	0+
2081	orf19.3307		Flavin-containing monooxygenase; catalyzes oxidation of biological thiols to maintain the ER redox buffer ratio for correct folding of disulfide-bonded proteins; Spider biofilm repressed	-0.114004	-0.148661	0
2579	orf19.3308	STB5	Putative transcription factor with zinc cluster DNA-binding motif; has similarity to S. cerevisiae Stb5p; Hap43p-repressed gene	-0.102437	-0.223148	3+
2002	orf19.331		Ortholog(s) have S-adenosylmethionine-dependent methyltransferase activity, protein methyltransferase activity and role in peptidyl-glutamine methylation, regulation of translation	0.0200806	0.115955	1+
2580	orf19.3319		Putative thioredoxin; Spider biofilm repressed	0.175372	0.294262	3+
1307	orf19.3321	MRS7	Member of the LETM1-like protein family, mitochondrial membrane protein	0.0452746	-0.122682	2+
1938	orf19.3324	TIF	Translation initiation factor; upregulated in highly virulent strain compared to less virulent strain; antigenic in human; flucytosine induced; downregulated upon phagocytosis by macrophages; Spider biofilm repressed	0.0372787	0.547655	0
1937	orf19.3325		Putative glycogen synthesis initiator; regulated by Efg1 and Efh1; Hog1-repressed; colony morphology-related gene regulation by Ssn6; induced by prostaglandins; flow model biofilm induced	0.0270872	-0.212843	0+
1936	orf19.3327	TRM2	Putative tRNA methyltransferase; repressed by prostaglandins; Spider biofilm induced	0.0780051	-0.0136431	0+
1309	orf19.3329		Ortholog(s) have sphingosine-1-phosphate phosphatase activity, role in calcium-mediated signaling and endoplasmic reticulum localization	0.0899803	-0.036385	2+
2697	orf19.333	FCY2	Purine-cytosine permease of pyrimidine salvage; mutation associated with resistance to flucytosine in clinical isolates; transposon mutation affects filamentation; farnesol-upregulated in biofilm	-0.144055	0.0093017	0+
1935	orf19.3330	CRL1	Predicted GTPase of RHO family; CAAX motif geranylgeranylated; expression in S. cerevisiae causes dominant-negative inhibition of pheromone response	-0.123201	0.131884	0+
1910	orf19.3340	SOD2	Mitochondrial Mn-containing superoxide dismutase; protection against oxidative stress; homotetramer active; N-terminal 34 amino acids removed on mitochondrial import; H2O2-induced via Cap1p; Hap43p-, alkaline-downregulated, farnesol-induced	-0.196251	-0.153017	0+
2772	orf19.3348		Ortholog(s) have structural constituent of ribosome activity and mitochondrial large ribosomal subunit localization	-0.126884	-0.356438	3.5+
2780	orf19.3352		Has domain(s) with predicted nucleotide binding, oxidoreductase activity and role in oxidation-reduction process	-0.054128	-0.0450535	0+
2779	orf19.3355	ISN1	Putative inosine 5'-monophosphate 5'-nucleotidase; fungal-specific (no human or murine homolog)	0.257841	-0.0230066	1+
1538	orf19.3356	ESP1	Putative caspase-like cysteine protease; mutation confers increased sensitivity to nocodazole; periodic mRNA expression, peak at cell-cycle S/G2 phase; mRNA binds She3	0.0630387	0.613986	4+
4052	orf19.3362		Has domain(s) with predicted flavin adenine dinucleotide binding, oxidoreductase activity and role in oxidation-reduction process	0.273456	0.244388	NA
1629	orf19.3363	VTC4	Putative polyphosphate synthetase; decreased expression in hyphae compared to yeast-form cells; fungal-specific (no human or murine homolog); virulence-group-correlated expression	0.118272	0.288019	0
2809	orf19.3365	DAO2	Putative D-amino acid oxidase; rat catheter biofilm induced	-0.129317	-0.158981	0
3868	orf19.3367		Ortholog(s) have structural constituent of ribosome activity and mitochondrial large ribosomal subunit localization	0.200252	-0.349145	NA
1280	orf19.3368		Ortholog of Candida albicans WO-1 : CAWG_03466	-0.00355468	-0.0653855	0+
931	orf19.3369	MOH1	Ortholog of S. cerevisiae Moh1, essential for staionary phase growth; induced by alpha pheromone in SpiderM medium and by Mnl1 under weak acid stress; possibly essential (UAU1 method); flow model biofilm induced; Spider biofilm induced	-0.136258	0.0112046	0+
3218	orf19.339	NDE1	Putative NADH dehydrogenase; may act alternatively to complex I in respiration; caspofungin repressed; rat catheter biofilm induced; Spider biofilm repressed	-0.00714244	0.141415	0+
1178	orf19.3391	ADK1	Putative adenylate kinase; repressed in hyphae vs yeast; macrophage-induced protein; adenylate kinase release used as marker for cell lysis; possibly an essential gene (UAU1 method); flow model biofilm induced; Spider biofilm repressed	-0.0541728	0.0661458	3+
1512	orf19.3395		Predicted MFS membrane transporter, member of the drug:proton antiporter (12 spanner) (DHA1) family; induced by nitric oxide, oxidative stress, alpha pheromone; fungal-specific; Hap43-repressed; Spider biofilm induced	0.135876	0.0245274	0+
2922	orf19.3399		Ortholog(s) have histone binding activity, role in histone exchange and Swr1 complex, cytoplasm localization	-0.0224608	-0.0448548	0+
2414	orf19.3402	FPG1	Formamidopyrimidine DNA glycosylase, involved in repair of gamma-irradiated DNA; Hap43p-repressed gene	0.0616444	0.0243238	0+
3916	orf19.3406		Predicted chloride transporter; member of conserved Mcm1 regulon; Spider biofilm repressed	-0.105203	0.0598216	NA
1107	orf19.3407		Putative transcription factor with zinc finger DNA-binding motif; Hap43p-repressed gene	0.0303383	-0.0484941	1+
2082	orf19.341		Putative spermidine export pump; fungal-specific (no human or murine homolog)	0.0104133	-0.0751883	0+
1108	orf19.3412	ATG15	Putative lipase; fungal-specific (no human or murine homolog); Hap43p-repressed gene	-0.0670172	0.0753873	0+
2823	orf19.3415	PTK2	Putative protein kinase of polyamine import; mutation confers hypersensitivity to high concentrations of tunicamycin; YPD flow model biofilm induced; rat catheter and Spider biofilm induced	0.0697587	0.36535	3+
1713	orf19.3417	ACF2	Putative endo-1,3-beta-glucanase; fungal-specific (no human or murine homolog)	0.0240034	-0.263131	0+
2518	orf19.3432		Predicted membrane transporter, member of the drug:proton antiporter (12 spanner) (DHA1) family, major facilitator superfamily (MFS); induced by nitric oxide	-0.0969505	0.0129373	0+
4132	orf19.3434	TRY5	Zn(II)2Cys6 transcription factor; regulator of yeast form adherence; required for yeast cell adherence to silicone substrate	-0.176217	-0.0849083	NA	Y
3437	orf19.3441	FRP6	Putative ammonia transport protein; regulated by Nrg1 and Tup1; regulated by Ssn6; induced by human neutrophils	0.583447	0.0136125	0+
2517	orf19.3442		Putative oxidoreductase; Hap43-repressed gene	0.438402	0.398429	1+
2516	orf19.3444		Predicted membrane transporter, member of the drug:proton antiporter (14 spanner) (DHA2) family, major facilitator superfamily (MFS); Hap43p-repressed gene	0.048379	-0.0631544	0+
2515	orf19.3445	HOC1	Protein with similarity to mannosyltransferases; similar to S. cerevisiae Hoc1p and C. albicans Och1p	0.0531915	-0.189058	0+
2824	orf19.3449		Ortholog(s) have cytoplasm, ribosome localization	-0.105356	-0.239107	1+
1630	orf19.3455		Putative mitochondrial inner membrane magnesium transporter; possibly an essential gene, disruptants not obtained by UAU1 method	0.141703	0.0424728	3+
2739	orf19.3458		Ortholog(s) have role in late endosome to vacuole transport via multivesicular body sorting pathway, protein targeting to vacuole and Golgi apparatus, Vps55/Vps68 complex, fungal-type vacuole membrane, mitochondrion localization	0.0935928	0.0801548	0
1553	orf19.3462	SAR1	Functional homolog of S. cerevisiae Sar1p, which is required for ER-to-Golgi protein transport; binds GTP; similar to small GTPase superfamily proteins; gene has intron; Hap43p-induced gene	0.0196054	1.0214	4+
1819	orf19.3463		Putative GTPase; role in 60S ribosomal subunit biogenesis; Spider biofilm induced	0.0512626	0.363716	3+
1820	orf19.3465	RPL10A	Predicted ribosomal protein; downregulated upon phagocytosis by murine macrophages; Hap43-induced; Spider biofilm repressed	-0.260518	0.996025	4+
4175	orf19.3466		Predicted methyltransferase; downregulated by fluphenazine treatment or in an azole-resistant strain that overexpresses CDR1 and CDR2	0.0936729	0.178739	NA
1228	orf19.3467		Ortholog(s) have ubiquitin binding activity and role in ER to Golgi vesicle-mediated transport, late endosome to vacuole transport via multivesicular body sorting pathway, retrograde vesicle-mediated transport, Golgi to ER	-0.735276	2.58294	4+
1165	orf19.3468	ALG11	Alpha-1,2-mannosyltransferase; catalyzes sequential addition of 2 terminal alpha 1,2-mannose residues to the Man5GlcNAc2-PP-dolichol intermediate during asparagine-linked glycosylation in the ER; Spider biofilm induced	-0.0157403	-0.0369059	3+
2444	orf19.3481		Putative mitochondrial ATP-dependent RNA helicase of the DEAD-box family, transcription is activated in the presence of elevated CO2	-0.0272592	-0.0809482	2+
2443	orf19.3482		Ortholog(s) have NAD+ diphosphatase activity, role in NADH metabolic process and cytosol, nucleus, peroxisome localization	-0.0579434	-0.0216116	0+
2581	orf19.349		Ortholog(s) have role in aerobic respiration, mRNA metabolic process and mitochondrial outer membrane localization	-0.0670598	-0.00191649	0+
2084	orf19.350	PRE9	Alpha3 (C9) subunit of the 20S proteasome; transcript regulated by Mig1	-0.0377161	-0.0385462	0
2924	orf19.3505		Ortholog(s) have role in TOR signaling cascade, actin filament bundle assembly, eisosome assembly, endosomal transport, establishment or maintenance of actin cytoskeleton polarity, regulation of cell growth and plasma membrane localization	0.174959	0.324166	0+
1876	orf19.3507	MCR1	Putative NADH-cytochrome-b5 reductase; soluble protein in hyphae; biofilm induced; alkaline downregulated; ketoconazole or flucytosine induced, farnesol-induced; protein present in exponential and stationary growth phase yeast cultures	-0.110216	0.0336078	0+
4003	orf19.351		Ortholog of S. cerevisiae : YPR153W, C. glabrata CBS138 : CAGL0L08382g, C. parapsilosis CDC317 : CPAR2_404520 and Candida tenuis NRRL Y-1498 : CANTEDRAFT_115795	0.0495979	-0.0718799	NA
1653	orf19.3526	ITR1	MFS inositol transporter; uptake of exogenous inositol; 12 transmembrane motifs; expressed in rich medium; fluconazole, caspofungin repressed; possibly essential (UAU1 method); flow model, rat catheter and Spider biofilm induced	0.211158	-0.0346156	1+
2336	orf19.3532	MRPL10	Putative mitochondrial large subunit ribosomal protein; colony morphology-related gene regulation by Ssn6	-0.0681318	-0.232624	4+
4161	orf19.3533		Ortholog(s) have role in ascospore formation, mitochondrial respiratory chain complex assembly, positive regulation of transcription from RNA polymerase II promoter	0.0521791	-0.180341	NA
3820	orf19.3536		Ortholog(s) have acetylglucosaminyltransferase activity, role in protein N-linked glycosylation and Golgi medial cisterna localization	0.204928	0.0391731	NA
1011	orf19.3539		Predicted nucleolar S-adenosylmethionine-dependent rRNA methyltransferase; Spider biofilm induced	-0.148298	-0.032173	2+
2582	orf19.354		Ortholog(s) have aminopeptidase activity, role in protein processing, protein stabilization and extrinsic to mitochondrial inner membrane, nucleus localization	0.135342	-0.0243238	0+
1869	orf19.3542	LEM3	Putative membrane protein; mutation increases resistance to miltefosine; early-stage flow model biofilm induced	0.114931	0.0058311	3+
3738	orf19.3545		Ortholog(s) have protein serine/threonine kinase activity, role in meiotic anaphase II, protein phosphorylation, septation initiation signaling cascade and nucleus, spindle pole body localization	-0.332703	0.0173355	NA
2428	orf19.3546	PEX2	Ortholog(s) have ubiquitin-protein ligase activity, role in protein import into peroxisome matrix and peroxisomal membrane localization	0.139787	0.0892258	0+
950	orf19.3548		Ortholog(s) have mitochondrion localization	0.0590131	0.0400704	2+
3219	orf19.355		Has domain(s) with predicted oxidoreductase activity and role in oxidation-reduction process	0.679693	0.673409	1+
909	orf19.3555	BUD14	Putative SH3-domain-containing protein; predicted role in bud-site selection; Spider biofilm induced	0.416624	0.336383	2+
4182	orf19.3557	GPI19	Subunit of GPI-GlcNAc transferase; role in synthesis of N-acetylglucosaminyl phosphatidylinositol (GlcNAc-PI), the first intermediate in GPI anchor synthesis; complements S. cerevisiae gpi19 mutant; flow model biofilm induced	0.0101896	0.0323865	NA
1125	orf19.3558		Ortholog(s) have Golgi apparatus, endoplasmic reticulum localization	-0.0372111	0.24503	0+
4203	orf19.3559		S. cerevisiae ortholog Mrps35p is a structural constituent of ribosome and localizes to mitochondrial small ribosomal subunit; the snoRNA CD39 is encoded within the MRPS35 intron	-0.134696	0.125452	NA
3822	orf19.3574	MDJ2	Predicted component of the mitochondrial import motor; involved in protein import into mitochondrial matrix; early-stage flow model biofilm induced	-0.157912	0.461308	NA
257	orf19.3575	CDC19	Pyruvate kinase at yeast cell surface; Gcn4/Hog1/GlcNAc regulated; Hap43/polystyrene adherence induced; repressed by phagocytosis/farnesol; hyphal growth role; stationary phase enriched; flow model biofilm induced; Spider biofilm repressed	-0.0335069	0.326893	4+
2018	orf19.3577	COQ5	Putative methyltransferase of ubiquinone biosynthesis; regulated by Gcn4; repressed by amino acid starvation (3-AT), Hap43; induced upon adherence to polystyrene; Spider biofilm repressed	-0.209403	-0.114348	3.5+
1027	orf19.3581		Ortholog(s) have histone binding activity, role in DNA replication-dependent nucleosome assembly and CAF-1 complex, cytoplasm localization	0.0294928	-0.23417	2+
959	orf19.3586		Ortholog(s) have role in fungal-type cell wall organization, vesicle-mediated transport and integral to endoplasmic reticulum membrane localization	0.266155	-0.0149312	0+
4321	orf19.3589	SPO11	DNA endonuclease; required for genetic recombination between homologous chromosomes during the parasexual cycle; produced in mitotically dividing cells; similar to S. cerevisiae Spo11 which functions in recombination during meiosis	0.0943262	-0.0342158	NA
1058	orf19.3591	APE3	Putative vacuolar aminopeptidase Y,; regulated by Gcn2 and Gcn4; rat catheter and Spider biofilm repressed	0.053176	0.0209121	0+
2345	orf19.3592	JEM1	Functional homolog of S. cerevisiae Jem1p, which acts with Scj1p and Kar2p (BiP) in protein folding and ER-associated degradation of misfolded proteins, and also has a role in karyogamy; has J domain and 4 tetratricopeptide repeats	-0.15761	-0.0334164	0+
3488	orf19.3603	MFG1	Regulator of filamentous growth; required for biofilm formation, virulence; interacts with Flo8 and Mss11	-0.213566	-0.0366587	0+	Y
1156	orf19.3606		Ortholog of S. cereviae Sna4 vacuolar outer membrane protein that plays a role in sensitivity to NA+; induced by Mnl1 under weak acid stress	-0.02816	-0.0540464	0+
1692	orf19.3607		Ortholog of C. parapsilosis CDC317 : CPAR2_806540, Candida tenuis NRRL Y-1498 : CANTEDRAFT_108823, Debaryomyces hansenii CBS767 : DEHA2B13596g and Candida dubliniensis CD36 : CD36_22860	0.0696119	-0.0704245	1+
1114	orf19.3608		Ortholog(s) have DNA insertion or deletion binding, Y-form DNA binding, double-strand/single-strand DNA junction binding, loop DNA binding activity	1.70071	0.581114	1+
240	orf19.3609	UTP15	Small subunit (SSU) processome component; mutation confers resistance to 5-fluorocytosine (5-FC); physically interacts with TAP-tagged Nop1p	-0.222145	0.587379	4+
2853	orf19.3612	PST2	Putative NADH:quinone oxidoreductase; similar to 1,4-benzoquinone reductase; immunogenic in mice; induced by benomyl, oxidative stress via Cap1; fungal-specific; farnesol-repressed; Spider biofilm induced	-0.101984	-0.164967	0+
1055	orf19.3613		Ortholog(s) have RNA polymerase II core binding, RNA polymerase II core promoter sequence-specific DNA binding transcription factor activity, TFIIF-class binding transcription factor activity, chromatin binding activity	-0.0595581	0.0385419	0+
3819	orf19.3624		Ortholog(s) have exoribonuclease II activity, role in mitochondrial RNA catabolic process and mitochondrial degradosome localization	0.0631981	-0.176162	NA
4097	orf19.3627		Ortholog of C. parapsilosis CDC317 : CPAR2_406910, Candida tenuis NRRL Y-1498 : CANTEDRAFT_104937, Debaryomyces hansenii CBS767 : DEHA2D02706g and Candida dubliniensis CD36 : CD36_22640	-0.123678	-0.146214	NA
2361	orf19.3630	RRP8	Ribosomal protein; Hap43-induced; F-12/CO2 early biofilm and rat catheter biofilm induced	0.0686787	0.350526	3.5+
997	orf19.3649		Ortholog(s) have adenyl-nucleotide exchange factor activity, role in cytoplasmic translation and cytosolic ribosome, nucleus localization	-0.212143	-0.137609	0+
1771	orf19.3658		Ortholog(s) have role in protein folding in endoplasmic reticulum and Golgi apparatus, endoplasmic reticulum, mitochondrion localization	0.051357	-0.029622	0+
4015	orf19.3659		Putative CTD phosphatase; role in dephosphorylation of RNA polymerase II C-terminal domain, transcription from RNA polymerase II promoter; flow model biofilm induced	0.230728	0.0709655	NA
3438	orf19.3669	SHA3	Putative ser/thr kinase involved in glucose transport; Tn mutation affects filamentous growth; fluconazole-induced; ketoconazole-repressed; induced in by alpha pheromone in SpiderM; possibly essential; flow model biofilm induced	-0.20632	-0.122085	0+	Y
2755	orf19.367	CNH1	Na+/H+ antiporter; required for wild-type growth, cell morphology, and virulence in a mouse model of systemic infection; not transcriptionally regulated by NaCl; fungal-specific (no human or murine homolog)	-0.0103556	0.0878608	0+
2519	orf19.3679		Putative protein of unknown function; stationary phase enriched protein	-0.0204148	-0.13049	0+
2391	orf19.3686		Ortholog(s) have protein domain specific binding activity, role in mitochondrial proton-transporting ATP synthase complex assembly and mitochondrion localization	0.0485314	0.0228357	0+
1827	orf19.3689		Putative protein similar to 6-phosphofructo-2-kinase/fructose-2,6-bisphosphatase; expression downregulated in an ssr1 null mutant	-0.12637	0.0661553	3+
4278	orf19.3697		Ortholog(s) have role in re-entry into mitotic cell cycle after pheromone arrest	-0.00518089	-0.0372469	NA
1391	orf19.3699	TEP1	Putative protein phosphatase of the PTP family (tyrosine-specific), similar to S. cerevisiae Tep1p	0.949652	0.678846	0+
1582	orf19.3700	TOM70	Ortholog(s) have mitochondrion targeting sequence binding, protein channel activity and role in protein import into mitochondrial inner membrane, protein import into mitochondrial matrix	0.171589	0.0124995	0+
1111	orf19.3705	PTC6	Mitochondrial protein phosphatase of the Type 2C-related family (serine/threonine-specific), functional homolog of S. cerevisiae Ptc6p; mutant shows virulence defect	-0.0374253	-0.0482837	0+
2456	orf19.3710	YHB5	Flavohemoglobin-related protein; not required for normal NO resistance; predicted globin/FAD-binding/NAD(P)-binding domains but lacks some conserved residues of flavohemoglobins; filament induced; rat catheter and Spider biofilm induced	0.0633706	-0.0160496	0+
1436	orf19.3711		Protein with monooxygenase domains; flow model biofilm induced	-0.185937	0.00203174	0+
1964	orf19.3715	ASF1	Protein similar to S. cerevisiae Asf1p, a chromatin assembly complex component; likely to be essential for growth, based on an insertional mutagenesis strategy	0.0835018	0.0280271	1+
1375	orf19.3720		Ortholog of Candida tenuis NRRL Y-1498 : CANTEDRAFT_103764, Debaryomyces hansenii CBS767 : DEHA2B08250g, Candida dubliniensis CD36 : CD36_27400 and Pichia stipitis Pignal : PICST_63653	-0.261102	-0.200893	3+
1077	orf19.3736	KAR4	Transcription factor; required for gene regulation in response to pheromones; ortholog of S. cerevisiae Kar4; role in karyogamy; opaque-specific, a-specific; induced by alpha factor	-0.00595562	0.00293166	0+
3019	orf19.3740	PGA23	Putative GPI-anchored protein of unknown function; Rim101-repressed; Cyr1-regulated; colony morphology-related gene regulation by Ssn6	-0.0209251	-0.0328657	0+
1864	orf19.3751		Putative serine/threonine protein kinase; possibly an essential gene, disruptants not obtained by UAU1 method	-0.195785	0.27343	2+
2351	orf19.3759		Putative elongator complex subunit; for modification of wobble nucleosides in tRNA; Spider biofilm induced	0.0995704	0.173005	3.5+
3410	orf19.3763		Ortholog of Candida tenuis NRRL Y-1498 : CANTEDRAFT_112512, Debaryomyces hansenii CBS767 : DEHA2E16808g, Candida dubliniensis CD36 : CD36_11710 and Pichia stipitis Pignal : PICST_53617	-0.153299	0.054005	0+
2395	orf19.3764	GSG1	Putative subunit of the TRAPP complex; involved in targeting of ER-to-Golgi transport vesicles; flow model biofilm induced	-0.029891	-0.0836908	2+
1217	orf19.3765	RAX2	Plasma membrane protein; detected at yeast-form cell plasma membrane by mass spec; filament induced, repressed by Rim101, Tup1; Hap43-induced; Spider biofilm induced	-0.163595	0.0124869	0+
2777	orf19.3770	ARG8	Putative acetylornithine aminotransferase; Gcn2, Gcn4 regulated; rat catheter biofilm induced; Spider biofilm induced	-0.0916439	-0.0409351	2+
4239	orf19.3785		DnaJ chaperone domain protein; role in pre-mRNA splicing; Spider biofilm induced	-0.075011	-0.273741	NA
1110	orf19.3792		Ortholog(s) have role in chromosome segregation, cytoplasmic mRNA processing body assembly, deadenylation-dependent decapping of nuclear-transcribed mRNA and formation of translation preinitiation complex, more	0.279141	0.0855757	2+
1746	orf19.3795	AGP3	Putative serine transporter; possible role in assimilation of sulfur; F-12/CO2 early biofilm induced	-0.274725	-0.114826	0+
3952	orf19.3799		Ortholog(s) have role in endoplasmic reticulum tubular network maintenance, nuclear pore complex assembly and Golgi apparatus, cortical endoplasmic reticulum, integral to endoplasmic reticulum membrane, mitochondrion localization	0.0832898	-0.138612	NA
1635	orf19.3803	MNN22	Alpha-1,2-mannosyltransferase; required for normal cell wall mannan; regulated by Tsa1, Tsa1B at 37 deg; repressed in core stress response; NO, Hog1 induced; confers sensitivity to cell wall perturbing agents; Spider biofilm repressed	0.150984	-0.0460015	3.5+
2116	orf19.3810		Ortholog(s) have methylenetetrahydrofolate dehydrogenase (NAD+) activity, role in folic acid-containing compound biosynthetic process, one-carbon metabolic process, purine nucleobase biosynthetic process and cytosol, nucleus localization	0.0828432	-0.00583213	0+
2117	orf19.3811	GYP1	Putative Cis-golgi GTPase-activating protein; transcript regulated by Nrg1, Mig1, and Tup1	0.202685	0.154835	0+
1310	orf19.3815		Has domain(s) with predicted ubiquitin thiolesterase activity and role in ubiquitin-dependent protein catabolic process	-0.0652723	-0.114143	0+
2119	orf19.3822	SCS7	Putative ceramide hydroxylase; regulated by Nrg1; induced in high iron; fluconazole-induced; Hap43-repressed; Spider biofilm induced	-0.0664683	0.00272323	0+
1261	orf19.3823	ZDS1	Nonessential protein; similar to S. cerevisiae Zds1p	0.0395025	0.429729	3+
2121	orf19.3841		Putative protein serine/threonine kinase; predicted role in vesicle formation in autophagy and the cytoplasm-to-vacuole targeting (Cvt) pathway; Spider biofilm induced	-0.0742554	0.281082	0+
1498	orf19.3846	LYS4	Homoaconitase; regulated by Gcn4, Gcn2; induced in response to amino acid starvation (3-AT); induced by human whole blood or PMNs; Hap43-repressed; Spider biofilm repressed	-0.11257	0.0989937	4+
1382	orf19.3852		Has domain(s) with predicted catalytic activity	-0.102716	-0.0329605	0+
1082	orf19.3854		Ortholog of S. cerevisiae Sat4; amphotericin B induced; clade-associated gene expression; Spider biofilm induced	-0.027901	0.194725	3+
4028	orf19.386	SAM4	Putative S-adenosylmethionine-homocysteine methyltransferase; Hap43-repressed; alkaline induced; Spider biofilm repressed	-0.200884	-0.0902991	NA
2504	orf19.387	GCR3	Functional homolog of S. cerevisiae Gcr3, which acts in regulation of glycolytic genes; no intron predicted, in contrast to intron in S. cerevisiae GCR3 gene	0.0117261	0.119657	0+
2029	orf19.3870	ADE13	Adenylosuccinate lyase; enzyme of adenine biosynthesis; soluble protein in hyphae; not induced during GCN response, in contrast to the S. cerevisiae ortholog; repressed by nitric oxide	0.0513593	0.258608	0
1447	orf19.3874		Predicted cation transmembrane transporter; Spider biofilm induced	-0.150446	-0.0886742	0+
2503	orf19.388	CAF16	ABC family protein, predicted not to be a transporter; Hap43, caspofungin repressed; Spider biofilm repressed	-0.0390447	-0.0508869	0+
2781	orf19.3895	CHT2	GPI-linked chitinase; required for normal filamentous growth; repressed in core caspofungin response; fluconazole, Cyr1, Efg1, pH-regulated; mRNA binds She3 and is localized to yeast-form buds and hyphal tips; Spider biofilm repressed	0.125069	0.145653	2+
1431	orf19.3901		Putative benzene desulfurase; induced by nitric oxide independent of Yhb1p	-0.275284	0.0171483	3+
2992	orf19.3910		Has domain(s) with predicted RNA binding, ribonuclease T2 activity	0.543207	0.376951	0+
1226	orf19.3911	SAH1	S-adenosyl-L-homocysteine hydrolase; sulfur amino acid metabolism; antigenic in human; alkaline-, fluconazole-induced expression; Gcn4-regulated; amino acid starvation (3-AT) repressed; flow model biofilm induced; Spider biofilm repressed	-0.0652261	-0.121864	4+
2449	orf19.3912	GLN3	GATA transcription factor, involved in regulation of nitrogen starvation-induced filamentous growth; regulates transcription of Mep2 ammonium permease; regulated by Gcn2 and Gcn4; mRNA binds She3; Spider biofilm induced	0.0463705	-0.0319492	0+
1948	orf19.3915		Putative metallodipeptidase; protein present in exponential and stationary growth phase yeast; Hog1-induced; Hap43-repressed; sumoylation target; Spider biofilm repressed	-0.11799	0.0709446	3+
1633	orf19.392		Ortholog(s) have role in mitochondrial respiratory chain complex III assembly and integral to mitochondrial membrane localization	0.472381	0.852648	0+
1840	orf19.3920		Ortholog(s) have protein disulfide isomerase activity, protein disulfide oxidoreductase activity, role in protein folding and fungal-type vacuole localization	0.476376	0.339513	1+
1259	orf19.3921		Ortholog(s) have cell division site, cell tip, cytosol, nucleus localization	-0.00764205	-0.101706	1+
2905	orf19.3922		Possible pyrimidine 5' nucleotidase; protein present in exponential and stationary growth phase yeast cultures; Hap43p-repressed gene	0.118747	0.085723	0+
2677	orf19.3923	PGA37	Putative GPI-anchored protein; Hap43-repressed; Spider biofilm induced	0.472956	0.184501	0+
2399	orf19.3926	RNY11	Ortholog(s) have endoribonuclease activity, role in RNA catabolic process, apoptotic process, cell morphogenesis and cytosol, extracellular region, vacuole localization	0.331793	0.461106	1+
1641	orf19.3929		Ortholog(s) have mitochondrion localization	0.399516	0.186842	0+
2745	orf19.3930	YUH2	Putative ubiquitin C-terminal hydrolase; sumoylation target	0.0663895	0.210082	0+
1372	orf19.3932		Predicted RNA binding protein; stationary phase enriched; induced in core caspofungin response; induced by nitric oxide independent of Yhb1; repressed in ssr1 null; ketoconazole, hypoxia induced; Spider biofilm induced	0.333818	0.237056	0+
4072	orf19.3937		Ortholog(s) have protein phosphatase type 2A regulator activity, role in cellular response to nitrogen starvation, signal transduction and cytosol, nucleus localization	0.00950335	0.100969	NA
3390	orf19.3938		Putative mitochondrial ribosomal protein of the small subunit; mutation confers hypersensitivity to 5-fluorocytosine (5-FC), 5-fluorouracil (5-FU), and tubercidin (7-deazaadenosine)	0.103841	-0.236575	3+
929	orf19.3941	URA7	CTP synthase 1; flucytosine induced; protein present in exponential and stationary growth phase yeast cultures	0.911899	3.30467	4+
1558	orf19.395	ENO1	Enolase; glycolysis and gluconeogenesis; major cell-surface antigen; binds host plasmin/plasminogen; immunoprotective; Hap43, phagocytosis induced; farnesol-repressed; flow model biofilm induced; Spider biofilm repressed; may be essential	0.27586	0.046498	4+
1687	orf19.3950	MSM1	Mitochondrial methionyl-tRNA synthetase (MetRS); functionally complements methionine auxotrophy of an E. coli MetRS mutant; transcript regulated by Nrg1; flow model biofilm induced	0.571116	0.433852	1+
1556	orf19.3952		Ortholog(s) have GTP binding, signal recognition particle binding activity, role in protein targeting to ER and cytosol, endoplasmic reticulum membrane, nucleus localization	0.466433	0.770845	2+
1678	orf19.3954		Ortholog(s) have phosphatidylserine decarboxylase activity and role in phosphatidylcholine biosynthetic process, phosphatidylethanolamine biosynthetic process, regulation of cell cycle cytokinesis, regulation of cell shape	0.279359	0.310884	3+
1539	orf19.3957		Ortholog(s) have GTP cyclohydrolase I activity, role in folic acid-containing compound biosynthetic process and cytosol, nucleus localization	0.0992899	0.303981	3+
2379	orf19.3964	ASH2	Ortholog(s) have histone methyltransferase activity (H3-K4 specific) activity, role in chromatin silencing at telomere, histone H3-K4 trimethylation, telomere maintenance and Lid2 complex, Set1C/COMPASS complex localization	0.534364	0.205502	3+
1791	orf19.3966	CRH12	CRH family cell wall protein; transcript regulated by Nrg1 and Tup1; alkaline induced by Rim101; repressed during cell wall regeneration; flow model biofilm induced	0.720723	0.119046	2+
2008	orf19.3980		Ortholog(s) have role in cytoplasmic translation, regulation of translation and cytosol, polysomal ribosome localization	0.193602	0.305143	0+
1064	orf19.3981	MAL31	Putative high-affinity maltose transporter; transcript is upregulated in clinical isolates from HIV+ patients with oral candidiasis; alkaline induced; Spider biofilm induced	0.380289	0.255514	0+
2009	orf19.3982		Maltase; induced during growth on sucrose; induced by alpha pheromone in SpiderM medium; early-stage flow model biofilm indced	0.152025	0.140895	0
2010	orf19.3983		Protein with a predicted transcription factor BTF3 domain; flow model biofilm induced	0.508125	0.495014	0+
2103	orf19.3991		Ortholog(s) have role in cellular lipid metabolic process and cytosol localization	0.17062	0.2105	0+
2587	orf19.3995	RIM13	Protease of the pH response pathway; likely to mediate activation of Rim101 via C-terminal cleavage; required for alkaline pH-induced hyphal growth and for normal chlamydospore formation; Hap43-repressed; flow model biofilm induced	0.466099	0.329791	0+
1148	orf19.4000	GRF10	Putative homeodomain transcription factor; null mutant is an adenine auxotroph; Spider biofilm induced; promoter bound by Bcr1, Tec1, Efg1, Ndt80 and Brg1	0.889093	0.106868	0+
1149	orf19.4001		Ortholog(s) have role in protein insertion into mitochondrial membrane from inner side and extrinsic to mitochondrial inner membrane, mitochondrial matrix localization	0.14613	0.0455636	2+
3455	orf19.4003	TIP20	Protein interacting with Sec20p, possibly involved in retrograde transport between the Golgi and the endoplasmic reticulum; similar to S. cerevisiae Tip20p	0.597086	0.659621	4+
2588	orf19.4006		Ortholog(s) have cytosol, nucleus localization	0.393972	0.395281	0+
2589	orf19.4010	PAN3	Ortholog(s) have poly(A)-specific ribonuclease activity, role in mRNA 3'-end processing, postreplication repair and PAN complex, cytosol, nucleus localization	0.0221289	-0.120868	0+
4075	orf19.4011		Similar to S. pombe mug180, a predicted esterase/lipase; highly induced during chlamydospore formation in both C. albicans and C. dubliniensis; flow model biofilm induced	0.628119	0.371377	NA
4255	orf19.4013		Putative protein of unknown function; Hap43p-repressed gene; S. cerevisiae ortholog YHR045W localizes to the endoplasmic reticulum	0.485583	0.297469	NA
2590	orf19.4014		Planktonic growth-induced gene	0.304493	0.157214	0+
930	orf19.4016		Putative ubiquinol-cytochrome-c reductase; amphotericin B induced; repressed by nitric oxide; protein level decreases in stationary phase cultures; Hap43-repressed; Spider biofilm repressed	-0.199686	-0.35967	3+
3895	orf19.4023	MRP2	Protein similar to S. cerevisiae Mrp2p, which is a component of the small subunit of the mitochondrial ribosome; transposon mutation affects filamentous growth	-0.161662	-0.00643045	NA
2104	orf19.4026	HIS1	ATP phosphoribosyl transferase; enzyme of histidine biosynthesis; acid upregulated/alkaline repressed by Rim101; regulated by Gcn2, Gcn4; strain CA9 is a his1 mutant; flow model biofilm induced; Spider biofilm repressed	0.715636	0.424825	4+
1159	orf19.403	PCL2	Cyclin homolog; reduced expression observed upon depletion of Cln3; farnesol regulated; periodic mRNA expression, peak at cell-cycle G1/S phase; Hap43-induced; rat catheter biofilm repressed	-0.0491533	0.0859036	0+
2105	orf19.4031		Ortholog(s) have cytoplasm localization	0.560269	0.654931	0+
2106	orf19.4035	PGA4	GPI-anchored cell surface protein; beta-1,3-glucanosyltransferase with similarity to the A. fumigatus GEL family; transcript induced in RHE model of oral candidiasis; fluconazol-induced	0.490197	0.394999	0+
2107	orf19.4040	ILV3	Dihydroxyacid dehydratase; repressed by nitric oxide; macrophage-induced protein; protein in exponential and stationary growth phase; Sef1, Sfu1p, Hap43-regulated; farnesol-repressed; flow model biofilm induced; Spider biofilm repressed	0.668045	0.775251	4+
1160	orf19.405	VCX1	Putative H+/Ca2+ antiporter; Spider biofilm repressed	0.162435	0.485385	0+
1230	orf19.406	ERG1	Squalene epoxidase, epoxidation of squalene to 2,3(S)-oxidosqualene; ergosterol biosynthesis; allylamine antifungal drug target; NADH reducing cofactor but S. cerevisiae Erg1 uses NADPH; flow model biofilm induced; Spider biofilm repressed	-0.165199	0.0364266	4+
1738	orf19.4060	ARO4	3-deoxy-D-arabinoheptulosonate-7-phosphate synthase; aromatic amino acid biosynthesis; GCN-regulated; feedback-inhibited by tyrosine if produced in S. cerevisiae Aro3p and Aro4p catalyze same reaction; protein decreases in stationary phase	-0.148437	0.0361215	0+
3540	orf19.4062	TRY2	Transcription factor; regulator of yeast form adherence; required for yeast cell adherence to silicone substrate; Spider biofilm induced	0.150734	0.9225	1+	Y
2837	orf19.4063	GPT1	GABA/polyamine transporter; 9 to 11 membrane spanning segments; complements GABA uptake defect of an S. cerevisiae uga4 put4 gap1 triple mutant; complements growth of an S. cerevisiae spe1 mutant under polyamine limitation	-0.0275973	-0.226604	1+
1761	orf19.4077	MIT1	Mannosylinositol phosphorylceramide (MIPC) synthase catalytic subunit; sphingolipid biosynthesis; fluconazole, caspofungin induced; macrophage-repressed; Spider biofilm induced	0.193002	0.142834	1+
3744	orf19.4079	SLP2	Protein similar to stomatin mechanoreception protein	0.0780588	0.057308	NA
1575	orf19.4088		Ortholog(s) have hydroxyacylglutathione hydrolase activity, role in cellular carbohydrate metabolic process, methylglyoxal catabolic process to D-lactate and cytosol, nucleus localization	0.280841	0.152429	0+
34	orf19.4106		Ortholog of S. cerevisiae : YJR141W, C. glabrata CBS138 : CAGL0M00264g, C. parapsilosis CDC317 : CPAR2_104880 and Candida tenuis NRRL Y-1498 : CANTEDRAFT_126860	-0.0734879	0.263431	3.5+
1204	orf19.4112		Ortholog(s) have thiamine diphosphokinase activity, role in negative regulation of thiamine biosynthetic process and cytosol localization	0.0835532	0.202517	0+
1471	orf19.4118	CNT	CNT family H(+)/nucleoside symporter; transports adenosine, uridine, inosine, guanosine, tubercidin; variant alleles for high/low-affinity isoforms; S or G at residue 328 affects specificity; Spider, flow model biofilm induced	0.0107308	-0.128303	1+
2370	orf19.4119	SPO72	Protein described as similar to S. cerevisiae sporulation protein; ortholog of S. cerevisiae Atg2, an autophagic vesicle formation protein; up-regulation associated with azole resistance; Spider biofilm induced	-0.0876202	0.112457	0+
2760	orf19.412	SSH1	Protein with a role in protein translocation across membranes	0.536854	0.164845	3.5+
2800	orf19.4128		Ortholog of C. parapsilosis CDC317 : CPAR2_209600, Candida tenuis NRRL Y-1498 : CANTEDRAFT_134010, Debaryomyces hansenii CBS767 : DEHA2C14960g and Candida dubliniensis CD36 : CD36_19390	-0.0633426	-0.0504393	0
2811	orf19.4131		Ortholog(s) have role in protein folding in endoplasmic reticulum and ER membrane protein complex localization	-0.0797666	0.201044	0+
3002	orf19.4136	YBL053	Ortholog(s) have protein heterodimerization activity	0.0260558	-0.114555	2+
3962	orf19.414		Predicted mitochondrial small ribosomal subunit; rat catheter and Spider biofilm induced	-0.0273419	0.0397616	NA
1197	orf19.4147	GLR1	Glutathione reductase; upregulated by human neutrophils; oxidative stress-induced regulation via Cap1p; overexpression correlates with multidrug resistance in a cap1 mutant, farnesol induced; stationary phase enriched protein	-0.0631807	-0.0102254	0+
3979	orf19.415		Putative protein of unknown function; Hap43p-repressed gene	0.0287483	-0.0128991	NA
3000	orf19.4151	SPO1	Protein similar to phospholipase B; fungal-specific (no human or murine homolog)	0.326379	0.190184	0+
799	orf19.4152	CEF3	Translation elongation factor 3; antigenic in humans; predicted C-term nucleotide-binding active site; protein on surface of yeast, not hyphae; polystyrene adherence induced; higher protein amount in stationary phase; possibly essential	0.867835	1.61585	4+
1147	orf19.4160		Ortholog(s) have serine-type endopeptidase activity, role in mitochondrial tRNA threonylcarbamoyladenosine modification and mitochondrion localization	-0.127456	0.0697901	3.5+
3058	orf19.4171		Has domain(s) with predicted ATP binding activity	0.052851	0.067588	0+
2485	orf19.4175	TOK1	Outwardly rectifying, noisily gated potassium channel; modulates sensitivity to human salivary histatin (Hst5); very similar to S. cerevisiae Tok1p; Bcr1-repressed in RPMI a/a biofilms	-0.0313977	-0.0581403	3+
4016	orf19.4176		Ortholog(s) have structural constituent of ribosome activity and mitochondrial small ribosomal subunit localization	-0.0654958	-0.30135	NA
3435	orf19.4183	MUC1	Protein similar to S. cerevisiae Muc1; a cell surface glycoprotein involved in filamentous growth; repressed by benomyl treatment; mutant is viable	0.511749	0.422613	0+
1802	orf19.4186	PCT1	Putative choline-phosphate cytidylyl transferase, antigenic during human oral infection	-0.236692	-0.400835	0+
1803	orf19.4187		Ortholog(s) have role in mitochondrial genome maintenance, phospholipid transport, protein import into mitochondrial outer membrane and ERMES complex, integral to endoplasmic reticulum membrane localization	-0.0641749	-0.124242	4+
154	orf19.4190	PAM18	Predicted component of the presequence translocase-associated import motor (PAM complex) involved in protein import into mitochondrial matrix; rat catheter biofilm induced	#N/A	#N/A	4+
4277	orf19.4195		Has domain(s) with predicted nucleic acid binding, zinc ion binding activity and intracellular localization	0.147105	-0.199066	NA
3731	orf19.4195.1	FCA1	Cytosine deaminase; enzyme of pyrimidine salvage; functional homolog of S. cerevisiae Fcy1p; mutation is associated with resistance to flucytosine (5-FC) in a clinical isolate; hyphal downregulated; gene has intron	0.00663067	-0.0959833	NA
1715	orf19.4197	YHM2	Predicted carrier protein; exports citrate from and imports oxoglutarate into the mitochondrion; alkaline induced; Spider biofilm repressed	-0.0325733	-0.16509	0+
1714	orf19.4199		Protein involved in ER-to-Golgi transport; rat catheter and Spider biofilm induced	0.123552	0.0279104	0+
1200	orf19.4208	RAD52	Required for homologous DNA recombination, repair of UV- or MMS-damaged DNA, telomere length, UV-induced LOH; constitutive expression, MMS-induced; weakly complements S. cerevisiae rad52 mutant; slow growth, increased white-to-opaque switch	0.0619385	0.243516	2+
2979	orf19.4210		Ortholog(s) have phospholipase A2 activity, role in cardiolipin acyl-chain remodeling and mitochondrion localization	-0.262857	0.00578901	3+
2978	orf19.4211	FET3	Multicopper oxidase; for growth in low iron, prostaglandin E2 synthesis; ketoconazole/caspofungin/amphotericin B repressed; Sef1/Sfu1/Hap43 regulated; reports differ if functional homolog of ScFet3; rat catheter and Spider biofilm induced	0.261724	0.244756	3+
2976	orf19.4213	FET31	Putative iron transport multicopper oxidase precursor; flucytosine induced; caspofungin repressed	0.0192108	-0.112825	0
1321	orf19.4229		Putative polyphosphate phosphatase; role in hydrolysis of diphosphorylated inositol polyphosphates and diadenosine polyphosphates; Spider biofilm induced	0.435005	0.333985	0+
3144	orf19.4231	PTH2	Putative cAMP-independent regulatory protein; constitutive expression independent of MTL or white-opaque status; Spider biofilm induced	1.63407	0.330391	2+
1103	orf19.4233	THR4	Putative threonine synthase; protein present in exponential and stationary growth phase yeast cultures; Gcn4p-regulated; sumoylation target	0.251274	0.280286	4+
399	orf19.4236	RET2	Delta subunit of the coatomer complex (COPI); coats Golgi-derived transport vesicles; involved in retrograde transport between Golgi and ER; interacts with Crk1 in the two-hybrid system; Spider biofilm repressed	0.0505741	0.44766	4+
1098	orf19.4240		Ortholog(s) have role in GPI anchor biosynthetic process, cellular manganese ion homeostasis and endoplasmic reticulum, fungal-type vacuole membrane localization	0.605319	0.314358	0+
1174	orf19.4242	CST20	Protein kinase of Ste20p/p65PAK family, required for wild-type mating efficiency and virulence in a mouse model; Cst20p-Hst7p-Cek1p-Cph1p MAPK pathway regulates some hyphal growth; involved in Cdc42p growth regulation	0.451397	0.176928	0+
4012	orf19.425		Has domain(s) with predicted translation release factor activity and role in translational termination	0.0964097	0.185524	NA
2396	orf19.4252		Ortholog(s) have protein serine/threonine kinase activity	0.714676	0.864509	3.5+
991	orf19.4255	ECM331	GPI-anchored protein; mainly at plasma membrane, also at cell wall; Hap43, caspofungin-induced; Plc1-regulated; Hog1, Rim101-repressed; colony morphology-related regulated by Ssn6; induced by ketoconazole and hypoxia	0.477774	0.245879	2+
1592	orf19.4262		Ortholog(s) have mRNA binding activity and role in cellular protein complex localization, establishment of mitochondrion localization, nuclear-transcribed mRNA catabolic process, deadenylation-dependent decay	-0.205215	-0.00997196	1+
3741	orf19.4274	PUT1	Putative proline oxidase; alkaline upregulated by Rim101; flow model biofilm induced; Spider biofilm induced	0.141978	0.0395846	NA
3966	orf19.4279	MNN1	Putative alpha-1,3-mannosyltransferase; of the mannosyltransferase complex; negatively regulated by Rim101; transcript elevated in chk1 and nik1 mutants, but not in sln1 mutant; Spider and flow model biofilm induced	0.567613	0.521722	NA
2520	orf19.428		Putative serine/threonine kinase; induced during planktonic growth; rat catheter biofilm repressed	-0.0931628	-0.0281788	0+
2451	orf19.4283		Ortholog(s) have role in translational initiation and cytosol, eukaryotic 43S preinitiation complex, eukaryotic translation initiation factor 3 complex, eIF3e, eukaryotic translation initiation factor 3 complex, eIF3m, nucleus localization	0.517391	0.549613	4+
1367	orf19.4287		Putative oxidoreductase; Hap43-repressed gene; clade-associated gene expression	0.196579	0.215116	0+
5021	orf19.4288	CTA7	Zn(II)2Cys6 transcription factor; activates transcription in 1-hybrid assay in S. cerevisiae; has similarity to S. cerevisiae Stb4	0.226821	0.195158	NA
191	orf19.4290	TRR1	Thioredoxin reductase; regulated by Tsa1/Tsa1B, Hap43; induced by nitric oxide, peroxide; oxidative stress-induce via Cap1; induced by human neutrophils; stationary phase enriched protein	-0.088099	-0.0512769	4+
3983	orf19.4294		Ortholog(s) have oxidoreductase activity, role in cytochrome c-heme linkage, mitochondrial membrane organization and extrinsic to mitochondrial inner membrane localization	0.498685	0.352121	NA
1891	orf19.4297	CKB2	Regulatory subunit of protein kinase CK2 (casein kinase II), beta' subunit; null mutants are hypersensitive to caspofungin	-0.228181	-0.0738244	0+
1892	orf19.4299	MSW1	Protein similar to S. cerevisiae Msw1p, which is mitochondrial tryptophanyl-tRNA synthetase; Hap43p-repressed gene; likely to be essential for growth, based on an insertional mutagenesis strategy	0.206224	0.442646	2+
1894	orf19.4306		Ortholog(s) have role in L-methionine salvage from methylthioadenosine and cytoplasm localization	-0.1356	-0.0663185	1+
1895	orf19.4308	HSL1	Probable protein kinase involved in determination of morphology during the cell cycle of both yeast-form and hyphal cells via regulation of Swe1p and Cdc28p; required for full virulence and kidney colonization in mouse systemic infection	0.262664	1.31105	2+
2943	orf19.4309	GRP2	Methylglyoxal reductase; regulation associated with azole resistance; induced in core stress response or by oxidative stress via Cap1, fluphenazine, benomyl, by Hap43 or with long term fluconazole treatment; Spider biofilm induced	0.386799	0.112984	1+
1756	orf19.4312		Ortholog(s) have TBP-class protein binding, transcription cofactor activity	3.24082	1.9961	1+
1396	orf19.4316		Trimethyllysine dioxygenase, the first enzyme in the carnitine biosynthesis pathway; hyphal-induced expression, regulated by Cyr1p, Ras1p, Efg1p	0.0985135	-0.138913	1+
1758	orf19.4318	MIG1	C2H2 transcription factor; repressor; regulates genes for carbon source utilization; Tup1-dependent and independent functions; hyphal, Hap43 and caspofungin repressed; Spider and flow model biofilm induced	0.482508	0.962149	3+
1346	orf19.4324		Has domain(s) with predicted NADH dehydrogenase (ubiquinone) activity, electron carrier activity and membrane localization	0.286948	0.381967	2+
2372	orf19.4325		Ortholog of C. parapsilosis CDC317 : CPAR2_303150, Candida tenuis NRRL Y-1498 : CANTEDRAFT_133407, Debaryomyces hansenii CBS767 : DEHA2G08030g and Candida dubliniensis CD36 : CD36_52760	0.364819	0.216587	3+
2851	orf19.4326		Ortholog(s) have role in mRNA cis splicing, via spliceosome, maturation of 5S rRNA and U4/U6 x U5 tri-snRNP complex localization	0.311268	0.452132	4+
2730	orf19.4334	PGA58	Putative GPI-anchored protein; transcription is positively regulated by Tbf1p	0.653707	0.508119	2+
3742	orf19.4339	VPS4	AAA-ATPase involved in transport from MVB to the vacuole and ESCRT-III complex disassembly; mutation decreases SAP secretion and virulence in murine intravenous infection; regulated by Gcn2p, Gcn4p; required for normal Rim8p processing	0.341487	0.107237	NA	Y
803	orf19.4341		Ortholog(s) have GPI-anchor transamidase complex localization	0.389216	0.657168	4+
2632	orf19.7383	MNN9	Protein of N-linked outer-chain mannan biosynthesis; mutant has defective cell wall	-0.121035	0.704413	3+
2900	orf19.4347		Putative serine/threonine protein kinase; Hog1p-induced	0.661992	0.665548	2+
1821	orf19.4356	HGT3	Putative glucose transporter of the major facilitator superfamily; the C. albicans glucose transporter family comprises 20 members; 12 probable membrane-spanning segments, extended C terminus; expressed in rich medium with 2% glucose	-0.11447	-0.0100998	0+
3999	orf19.4357		Putative protein similar to S. cerevisiae Mgr3p, a subunit of the i-AAA protease supercomplex that degrades misfolded mitochondrial proteins	-0.015407	-0.174174	NA
2789	orf19.4365		Has domain(s) with predicted RNA methyltransferase activity and role in RNA processing, tRNA processing	-0.0829668	-0.12644	0+
4128	orf19.4366		Ortholog of Candida dubliniensis CD36 : CD36_28870, Candida tropicalis MYA-3404 : CTRG_00731 and Candida albicans WO-1 : CAWG_01703	0.965035	0.245697	NA
3416	orf19.4370		Protein of unknown function; induced by nitric oxide; oxidative stress-induced via Cap1; fungal-specific (no human or murine homolog)	-0.110423	-0.0157383	0+
1886	orf19.4371	TAL1	Transaldolase; protein present in exponential and stationary growth phase yeast cultures; oxidative stress-induced via Cap1; induced by nitric oxide independent of Yhb1p; sumoylation target; rat catheter biofilm repressed	-0.180925	0.00900805	4+
1415	orf19.4372		Predicted transmembrane transporter; rat catheter and Spider biofilm induced	0.0734256	0.430622	2+
1887	orf19.4375		Ortholog(s) have S-adenosylmethionine-dependent methyltransferase activity, role in chromatin silencing at rDNA, nicotinamide metabolic process and cytosol localization	0.0871228	-0.143107	0+
3417	orf19.4376		Protein of unknown function; Spider biofilm induced	0.0932933	-0.0291452	0+
2826	orf19.4379	PRP13	Putative integral inner mitochondrial membrane protein with similarity to exonucleases	-0.108034	0.112712	4+
2505	orf19.4381	VTC3	Putative polyphosphate synthetase; downregulated in core caspofungin response; Hog1p-induced; transcription is opaque-specific; fungal-specific (no human or murine homolog)	-0.0808975	-0.213674	0+
2666	orf19.4396		Mitochondrial inner membrane protein; mammalian mitofilin domain; Spider biofilm repressed	-0.0345359	0.0264672	0+
49	orf19.4410	ALG1	Protein similar to S. cerevisiae Alg1p, a mannosyltransferase involved in N-linked protein glycosylation; likely to be essential for growth, based on an insertional mutagenesis strategy	-0.148756	0.0757251	3+
4251	orf19.4414		Ortholog of C. parapsilosis CDC317 : CPAR2_501450, Candida tenuis NRRL Y-1498 : CANTEDRAFT_105024, Debaryomyces hansenii CBS767 : DEHA2D12364g and Candida dubliniensis CD36 : CD36_45590	1.22937	0.765995	NA
1295	orf19.4416	VPS13	Putative vacuolar protein sorting-associated protein; gene used for multilocus sequence typing	0.11536	-0.208329	0+
3395	orf19.4424	PHO100	Putative inducible acid phosphatase; DTT-extractable and observed in culture supernatant in low-phosphate conditions; slight effect on murine virulence; virulence-group-correlated expression; N-glycosylated; F-12/CO2 early biofilm induced	-0.082384	-0.147065	1+
19	orf19.4441		Ortholog(s) have DNA replication origin binding, double-stranded DNA binding, single-stranded DNA binding activity	-0.080315	0.2093	NA
2584	orf19.4446		Protein similar to ammomium permeases that is probably inactive, as a mep2 mep3 double homozygous null mutation abolishes cellular ammomium permease activity; fungal-specific (no human or murine homolog)	0.0567227	0.000410774	3.5+
2088	orf19.4447	YMC1	Putative inner mitochondrial membrane transporter; flucytosine induced; Spider biofilm repressed	0.019196	-0.0647141	0
1271	orf19.445		Protein of unknown function; repressed by prostaglandins	-0.071482	0.223313	0+
3869	orf19.4459		Predicted heme-binding stress-related protein; Tn mutation affects filamentous growth; induced during chlamydospore formation in C. albicans and C. dubliniensis; Spider biofilm induced	-0.0248121	0.0407148	NA
1359	orf19.4461		Ortholog of Candida albicans WO-1 : CAWG_01005	-0.187905	-0.125628	2+
3740	orf19.4466		Ortholog(s) have palmitoyltransferase activity and role in ascospore formation, protein palmitoylation, protein targeting to membrane	-0.0938469	-0.206568	NA
2413	orf19.4471		Ortholog(s) have role in protein targeting to vacuole, re-entry into mitotic cell cycle after pheromone arrest and endoplasmic reticulum membrane localization	0.162754	-0.0908509	0+
61	orf19.4473	SPC19	Essential subunit of the Dam1 (DASH) complex, which acts in chromosome segregation by coupling kinetochores to spindle microtubules	-0.151022	1.76258	4+
1028	orf19.4475	KTR4	Mannosyltransferase; induced during cell wall regeneration; fungal-specific (no human or murine homolog); Bcr1-repressed in RPMI a/a biofilms	-0.128804	-0.123376	0+
1731	orf19.4494	KTR2	Mannosyltransferase; transcription elevated in chk1, nik1, and sln1 homozygous null mutants; fungal-specific (no human or murine homolog); possibly an essential gene, disruptants not obtained by UAU1 method	-0.175019	-0.15347	1+
1026	orf19.4496		Ortholog(s) have Golgi apparatus, endoplasmic reticulum, fungal-type vacuole localization	-0.0694915	-0.180223	0+
73	orf19.4497	MED8	Ortholog(s) have RNA polymerase II core promoter proximal region sequence-specific DNA binding, RNA polymerase II transcription corepressor activity, TBP-class protein binding, structural molecule activity	3.26506	1.8102	1+
1162	orf19.4506	LYS22	Putative homocitrate synthase; repressed by nitric oxide and by hypoxia; protein level decreases in stationary phase cultures; induced by ketoconazole, Spider biofilm induced	-0.163589	-0.0559102	4+
1932	orf19.4518		Protein kinase of unknown function; mutants are viable	-0.0396229	-0.178874	1+
2975	orf19.4519	SUV3	RNA helicase; mitochondrial RNA catabolism; required for chlamydospore formation, embedded hyphal growth, wild-type respiratory growth, alkaline-induced morphogenesis and SD or Spider biofilm formation; rat catheter biofilm induced	-0.205332	-0.373829	3+	Y
3424	orf19.4520		Putative gluconokinase; rat catheter biofilm induced	0.0112948	-0.181406	0+
3397	orf19.4524	ZCF24	Predicted Zn(II)2Cys6 transcription factor; caspofungin induced; Hap43-repressed	-0.254965	0.0745749	0+
4334	orf19.4525		Ortholog(s) have endoplasmic reticulum, nuclear pore localization	-0.257081	-0.101629	NA
1089	orf19.4526	HSP30	Putative heat shock protein; fluconazole repressed; amphotericin B induced; Spider biofilm induced; rat catheter biofilm induced	-0.145576	-0.0244395	0+
4091	orf19.4528		Ortholog(s) have role in vacuolar protein processing and endoplasmic reticulum localization	-0.119623	-0.0760816	NA
1054	orf19.4534		Putative UBX-domain (ubiquitin-regulatory domain) protein; macrophage-downregulated gene	-0.0514273	-0.170195	3+
3160	orf19.4546	HOL4	Putative ion transporter; alkaline induced by Rim101; Plc1-regulated; caspofungin repressed; rat catheter and Spider biofilm induced	-0.00303273	-0.00858738	0+
1087	orf19.4548	MAK32	Putative protein involved in the structural stability of L-A double-stranded RNA-containing particles; downregulated upon adherence to polystyrene	-0.0438031	0.0373128	0+
912	orf19.4551	CTN1	Carnitine acetyl transferase; required for growth on nonfermentable carbon sources, not for hyphal growth or virulence in mice; induced in macrophage; macrophage/pseudohyphal-repressed after 16 hr; rat catheter, Spider biofilm induced	0.0792396	-0.0298838	0+
2844	orf19.4560	BFR1	Protein involved in the maintenance of normal ploidy; S. cerevisiae ortholog cofers Brefeldin A resistance; stationary phase enriched protein; Spider biofilm repressed	0.239098	0.247035	0+
3809	orf19.4563		Protein of unknown function; repressed by prostaglandins; Hap43-induced, Spider biofilm induced	-0.149957	0.0219722	NA
3391	orf19.4569		Ortholog of Debaryomyces hansenii CBS767 : DEHA2C14850g, Candida dubliniensis CD36 : CD36_42100, Pichia stipitis Pignal : PICST_52615 and Spathaspora passalidarum NRRL Y-27907 : SPAPADRAFT_58608	-0.308791	0.0641659	0+
3381	orf19.457		Ortholog(s) have ubiquitin-specific protease activity, role in protein deubiquitination, ubiquitin-dependent protein catabolic process via the multivesicular body sorting pathway and cytosol localization	0.0150806	-0.0949562	1+
1384	orf19.4571		CoA-transferase family protein; rat catheter biofilm repressed	0.071535	-0.100801	0+
2788	orf19.4573	ZCF26	Zn2-Cys6 transcription factor of unknown function; induced by alpha pheromone in SpiderM medium	0.203137	-0.0506678	1+
4093	orf19.4577		Ortholog(s) have GTPase activating protein binding, cAMP-dependent protein kinase inhibitor activity, signal transducer activity	-0.0964336	0.0475284	NA
2599	orf19.4579		Putative SURF4 family member; plasma membrane-localized	0.445809	0.482397	0+
2600	orf19.4584	PHO114	Acid phosphatase; induced by Mnl1 under weak acid stress; Spider biofilm induced	0.0386136	-0.0672197	3.5+
2157	orf19.4587	HGH1	Putative HMG1/2-related protein; transcript regulated by Mig1	-0.109832	-0.0313927	0+
1085	orf19.459	ADP1	Putative PDR-subfamily ABC transporter; similar to WHITE subfamily proteins; gene used for strain identification by multilocus sequence typing	0.230361	0.324911	0+
2601	orf19.4592	HSX11	UDP-glucose:ceramide glucosyltransferase (glucosylceramide synthase [GCS], EC 2.4.1.80); involved in glucosylceramide biosynthesis, which is important for virulence	-0.00317935	-0.198492	4+
1576	orf19.4593	RGA2	Putative GTPase-activating protein (GAP) for Rho-type GTPase Cdc42; involved in cell signaling pathways controlling cell polarity; induced by low-level peroxide stress; flow model biofilm induced	0.170528	0.34661	1+
2602	orf19.4594		Clathrin light chain; subunit of the major coat protein involved in intracellular protein transport and endocytosis; Spider biofilm repressed	-0.206546	0.0159755	3.5+
1063	orf19.4599	PHO89	Putative phosphate permease; transcript regulated upon white-opaque switch; alkaline induced by Rim101; possibly adherence-induced; F-12/CO2 model, rat catheter and Spider biofilm induced	-0.0256823	-0.0647665	0+
2160	orf19.4608	PDC12	Putative pyruvate decarboxylase; fungal-specific (no human or murine homolog)	-0.0988375	-0.146755	0+
2603	orf19.4610		Has domain(s) with predicted metallocarboxypeptidase activity and role in proteolysis	-0.0115288	0.0630296	0+
899	orf19.4612		Protein with a dienelactone hydrolase domain; Hap43-repressed gene	-0.170896	-0.120944	0+
3277	orf19.4614		Adapter protein for pexophagy and the cytoplasm-to-vacuole targeting (Cvt) pathway; Spider biofilm induced	0.0386615	-0.0469675	0+
2161	orf19.4617		Predicted peptide alpha-N-acetyltransferase; flow model biofilm induced	0.0584509	-0.0853304	0+
2604	orf19.4624	HRT2	Protein described as having a role in Ty3 transposition; repressed in hyphae vs yeast cells; stationary phase enriched protein; Spider biofilm repressed	-0.157613	-0.163307	1+
3811	orf19.4629		Ortholog(s) have ubiquitin-ubiquitin ligase activity, role in mitochondrion inheritance, protein monoubiquitination, protein polyubiquitination and plasma membrane, ubiquitin ligase complex localization	-0.131013	0.174649	NA
1655	orf19.4630	CPA1	Putative carbamoyl-phosphate synthase subunit; alkaline repressed; rat catheter, Spider and flow model biofilm induced	-0.0724871	0.0637199	0
4057	orf19.4639		Protein present in exponential and stationary growth phase yeast cultures	0.219444	-0.216385	NA
1066	orf19.4650	ILV6	Putative regulatory subunit of acetolacetate synthase; alkaline induced; regulated by Gcn2 and Gcn4; protein present in exponential and stationary growth phase yeast; Spider biofilm repressed	-0.116114	0.166556	3.5+
2430	orf19.4655	OPT6	Putative oligopeptide transporter; fungal-specific (no human or murine homolog); expression of OPT6, OPT7, or OPT8 does not suppress defect of mutant lacking Opt1p, Opt2p, and Opt3p; alleles are nonidentical	-0.099053	-0.162364	0+
1418	orf19.4658		RING finger and CHY zinc finger domain-containing protein; mutant are viable	0.0560217	-0.011987	0+
2400	orf19.4668		Protein with a glycoside hydrolase domain; mutants are viable	-0.0687795	-0.0195442	0+
2461	orf19.4678		Predicted triglyceride lipase; Spider biofilm induced	0.297355	0.51685	0+
1009	orf19.4679	AGP2	Amino acid permease; hyphal repressed; white-opaque switch regulated; induced in core caspofungin response, during cell wall regeneration, by flucytosine; regulated by Sef1, Sfu1, and Hap43; rat catheter and Spider biofilm induced	0.105648	-0.0574234	0+
3813	orf19.4686		Ortholog of S. cerevisiae : YIL151C, C. glabrata CBS138 : CAGL0H06611g, C. parapsilosis CDC317 : CPAR2_401340 and Candida tenuis NRRL Y-1498 : CANTEDRAFT_104645	0.346824	0.369518	NA
2736	orf19.4688	DAG7	Secretory protein; a-specific, alpha-factor induced; mutation confers hypersensitivity to toxic ergosterol analog; fluconazole-induced; induced during chlamydospore formation in C. albicans and C. dubliniensis	-0.0388877	0.00183911	3.5+
1625	orf19.4699		Putative phospholipase of patatin family; similar to S. cerevisiae Tgl3p; predicted Kex2p substrate	0.0633328	-0.00634436	3+
4179	orf19.4701		Ortholog(s) have ATPase activity, tRNA binding activity, role in protein urmylation, regulation of transcription from RNA polymerase II promoter, tRNA wobble uridine modification and Elongator holoenzyme complex localization	0.191283	0.181709	NA
1792	orf19.4704	ARO1	Putative pentafunctional arom enzyme; fungal-specific (no human or murine homolog); Gcn2p-, Gcn4p-regulated	-0.185516	0.815028	4+
72	orf19.4705		Ortholog(s) have tRNA adenylyltransferase activity, role in tRNA 3'-terminal CCA addition and cytosol, mitochondrial matrix localization	0.0814434	1.03319	4+
1499	orf19.4718	TRP5	Predicted tryptophan synthase; identified in detergent-resistant membrane fraction (possible lipid raft component); predicted N-terminal acetylation; Gcn4p-regulated; S. cerevisiae ortholog is Gcn4p regulated; upregulated in biofilm;	0.21017	0.0937961	4+
3792	orf19.4722		Ortholog(s) have sequence-specific DNA binding RNA polymerase II transcription factor activity	-0.0887161	0.0216064	NA
1167	orf19.4725	SWI6	Putative component of the MBF and SBF transcription complexes involved in G1/S cell-cycle progression; periodic mRNA expression, peak at cell-cycle G1/S phase	0.0127448	0.0212238	0+
1523	orf19.473	TPO4	Putative sperimidine transporter; fungal-specific (no human or murine homolog); Spider biofilm induced; promoter bound by Tec1 and Ndt80; Bcr1-repressed in RPMI a/a biofilms	0.122142	-0.0508887	0+
4089	orf19.4730		Ortholog of S. cerevisiae : YNL050C, C. glabrata CBS138 : CAGL0G01276g, C. parapsilosis CDC317 : CPAR2_804440, Candida tenuis NRRL Y-1498 : CANTEDRAFT_94168 and Debaryomyces hansenii CBS767 : DEHA2D02882g	-0.0171472	-0.128507	NA
2346	orf19.4735		Ornithine cyclodeaminase family protein; Sef1, Sfu1, and Hap43-regulated; ortholog of S. cerevisiae YGL159W and S. pombe SPAP11E10.01; rat catheter biofilm induced	-0.169296	-0.113766	2+
1656	orf19.4736		Ortholog(s) have alkaline phosphatase activity, nucleotide phosphatase activity, role in nicotinamide nucleotide metabolic process, protein dephosphorylation and fungal-type vacuole membrane localization	-0.0216449	0.117735	0+
1528	orf19.4737	TPO3	Putative polyamine transporter; MFS-MDR family; induced by Sfu1, regulated upon white-opaque; decreased expression in hyphae vs yeast-form cells; regulated by Nrg1; Spider biofilm repressed	-0.125941	0.0392817	0+
3402	orf19.4743	AFG1	Putative mitochondrial ATPase of the AAA family; similar but not orthologous to S. cerevisiae Afg1; mutant is viable; regulated by Sef1, Sfu1, and Hap43	-0.0457573	-0.0377843	0+
1890	orf19.4754	ZWF1	Glucose-6-phosphate dehydrogenase; antigenic in mice; activity induced by O2 or oxidizing agents H2O2, menadione, macrophage; caspofungin repressed; induced in core stress response; regulated by Gcn2, Gcn4; rat catheter biofilm repressed	-0.0743956	-0.0092738	3+
1192	orf19.4755	KEX2	Subtilisin-like protease (proprotein convertase); processes aspartyl proteinase Sap2; required for hyphal growth and wild-type virulence in mice; functional homolog of S. cerevisiae Kex2, which processes alpha-factor; Tup1-repressed	0.333401	0.052178	2+
1416	orf19.4758		Putative reductase or dehydrogenase; Hap43-repressed gene; alkaline repressed	0.156094	0.297374	4+
2942	orf19.4760		Putative protein-histidine N-methyltransferase; Spider biofilm induced	0.0224146	-0.0146428	1+
1133	orf19.4761	HST1	Putative histone deacetylase, involved in regulation of white-opaque switching	0.242587	0.265865	1+
1244	orf19.4764		Ortholog(s) have poly(A)-specific ribonuclease activity, role in mRNA 3'-end processing, postreplication repair and PAN complex localization	-0.259641	-0.0573599	0+
3795	orf19.4766	ARG81	Zn(II)2Cys6 transcription factor; required for utilization of ornithine as a nitrogen source and for wild-type resistance to caffeine; required for yeast cell adherence to silicone substrate	0.548407	-0.142208	NA	Y
2358	orf19.4768		Protein of unknown function; Spider biofilm induced	-0.110214	-0.09135	0+
2321	orf19.4769	IPT1	Inositol phosphoryl transferase; catalyzes the synthesis of the most abundant sphingolipid, mannose-(inositol-P)2-ceramide, M(IP)2C, from MIPC; required for wild-type membrane localization of Cdr1; Spider biofilm induced	-0.0962508	0.0387681	1+	Y
3411	orf19.4771		Protein of unknown function; Spider biofilm induced	-0.188956	-0.292978	1+
1408	orf19.4773	AOX2	Alternative oxidase; cyanide-resistant respiration; induced by antimycin A, oxidants; growth; Hap43, chlamydospore formation repressed; rat catheter, Spider biofilm induced; regulated in Spider biofilms by Bcr1, Tec1, Ndt80, Brg1	0.242871	0.506912	0+
3797	orf19.4778	LYS142	Zn(II)2Cys6 transcription factor; has similarity to S. cerevisiae Lys14, involved in the regulation of lysine biosynthesis genes; fungal-specific	0.118617	0.540707	NA
1515	orf19.4779		Putative transporter; slightly similar to the Sit1p siderophore transporter; Gcn4p-regulated; fungal-specific; induced by Mnl1p under weak acid stress	-0.0120305	0.0477886	0+
3211	orf19.478		Protein required for fusion of cvt-vesicles and autophagosomes with the vacuole; plays a role in autophagy, protein targeting to vacuole and vesicle docking; flow model biofilm induced	-0.163741	0.0384795	0+
2334	orf19.4780		Predicted MFS family membrane transporter, member of the drug:proton antiporter (12 spanner) (DHA1) family; Spider biofilm induced	-0.0526418	-0.151193	0+
2712	orf19.4781	GRP1	Protein similar to dihydroflavonol-4-reductases	-0.0217402	-0.0527785	0+
2711	orf19.4783		Protein of unknown function; induced during chlamydospore formation in both C. albicans and C. dubliniensis	0.112338	-0.115487	0+
1926	orf19.4788	ARG5,6	Arginine biosynthetic enzyme; processed in S. cerevisiae into 2 polypeptides with acetylglutamate kinase (Arg6) activity and acetylglutamate-phosphate reductase (Arg5) activity; Gcn4 regulated; alkaline repressed; Spider biofilm induced	-0.0878475	-0.160102	4+
2366	orf19.4798		Ortholog(s) have role in establishment of protein localization to plasma membrane and mitochondrion, plasma membrane localization	-0.0227417	-0.0513539	0+
2842	orf19.4802	FTH1	Protein similar to S. cerevisiae Fth1p, a high affinity iron transporter for intravacuolar stores of iron; repressed by Sfu1p, amphotericin B, caspofungin; induced by alkaline pH, ciclopirox olamine; regulated by Sef1p, Sfu1p, and Hap43p	-0.0671263	-0.149042	4+
1434	orf19.4804	LIP2	Secreted lipase; member of a differentially expressed lipase gene family; expressed in alimentary tract, but not oral tissue, during mouse oral infection; may have a role in nutrition and/or in creating an acidic microenvironment	-0.0797662	-0.198129	1+
2998	orf19.4805		Putative membrane protein; induced by alpha pheromone in SpiderM medium; Hap4-induced gene; Spider biofilm induced	0.0427051	-0.112681	0
1956	orf19.4807		Ortholog(s) have inorganic diphosphatase activity, role in aerobic respiration and mitochondrion localization	-0.311422	-0.0960805	0+
538	orf19.4809	ERG12	Ortholog(s) have mevalonate kinase activity and role in ergosterol biosynthetic process, farnesyl diphosphate biosynthetic process, mevalonate pathway, isopentenyl diphosphate biosynthetic process, mevalonate pathway	-0.159544	0.312797	4+
1958	orf19.4813	GUA1	Putative GMP synthase, involved in the final step of guanine biosynthesis; soluble protein in hyphae; flucytosine induced; macrophage-downregulated protein abundance; protein level decreases in stationary phase cultures	-0.0234857	0.155643	3.5+
3798	orf19.4816		Protein of unknown function; induced by nitric oxide	-0.289788	-0.337543	NA
1383	orf19.4821	LIP1	Secreted lipase, member of a lipase gene family whose members are expressed differentially in response to carbon source and during infection; may have a role in nutrition and/or in creating an acidic microenvironment	0.380327	0.0883673	3+
1458	orf19.4822	LIP10	Secreted lipase, member of a lipase gene family whose members are expressed differentially in response to carbon source and during infection; may have a role in nutrition and/or in creating an acidic microenvironment	-0.169712	0.181845	0+
1457	orf19.4823	LIP6	Secreted lipase, member of family of lipase genes expressed differentially in response to carbon source and during infection; may have a role in nutrition and/or in creating an acidic microenvironment; induced on adherence to polystyrene	-0.151008	-0.0138561	0+
2102	orf19.4826	IDH1	Putative mitochondrial NAD-isocitrate dehydrogenase subunit 1; soluble protein in hyphae; protein level decrease in stationary phase cultures	-0.569786	-0.356204	0+
2101	orf19.4827	ADE12	Adenylosuccinate synthase; upregulated in biofilm; decreased expression in hyphae vs yeast-form cells; not induced during GCN response, in contrast to S. cerevisiae ADE12, which is induced by Gcn4p; stationary phase-enriched protein	-0.014474	0.244836	4+
1456	orf19.4831	MTS1	Sphingolipid C9-methyltransferase; catalyzes methylation of the 9th carbon in the long chain base component of glucosylceramides; glucosylceramide biosynthesis is important for virulence; Spider biofilm repressed	-0.119131	-0.120168	0+
2100	orf19.4833	MLS1	Malate synthase; glyoxylate cycle enzyme; no mammalian homolog; regulated upon white-opaque switch; phagocytosis, strong oxidative stress induced; stationary phase enriched; flow model biofilm repressed; rat catheter, Spider biofilm induced	-0.110595	0.0310296	0+
1455	orf19.4836	URA1	Dihydroorotate dehydrogenase; de novo pyrimidine biosynthesis; regulated by yeast-hypha switch, Nrg1/Mig1/Tup1; flow model biofilm induced; rat catheter and Spider biofilm repressed	0.0676934	0.0599326	3.5+
2099	orf19.4841	SHY1	Cytochrome c oxidase biosynthesis protein; transcript regulated by Nrg1 and Mig1	0.114869	-0.0321271	0+
3799	orf19.4843		Putative iron/copper reductas; involved in iron homeostasis; rat catheter and Spider biofilm induced	-0.11267	-0.0898609	NA
3800	orf19.4844		Ortholog(s) have RNA binding, polynucleotide adenylyltransferase activity, protein binding, bridging activity	0.242077	0.0194746	NA
2098	orf19.4845		Putative integral membrane protein; fluconazole-induced	0.0675339	-0.0889267	0
2097	orf19.4846		GlcNAc-induced protein	0.0100634	0.0598659	0+
3454	orf19.4850		Ortholog(s) have cytosol, nucleus localization	0.271511	0.091055	0+
1105	orf19.4855	BUD31	Bud31 ortholog; not subject to mating-type regulation, in contrast to S. cerevisiae Bud31 which has a role in specifying the bud site; Spider biofilm induced	0.0519368	0.0340686	0+
1454	orf19.4856	LIP3	Secreted lipase; gene family member whose members are expressed differentially in response to carbon source and infection; possible role in nutrition and/or in creating an acidic microenvironment; flow model biofilm induced	-0.105118	0.119167	0+
3801	orf19.4866	CPP1	VH1 family MAPK phosphatase; regulates Cst20-Hst7-Cek1-Cph1 filamentation pathway; represses yeast-hyphal switch; required for virulence in mice; yeast-enriched; induced by alpha pheromone in SpiderM medium; Spider biofilm induced	-0.237761	0.0635794	NA
1824	orf19.4874	MNN23	Alpha-1,2-mannosyltransferase; mutants hypersensitive to toxic ergosterol analog, amphotericin B, calcofluor white, growth at 42 degrees and have decreased cell wall mannan; flow model biofilm induced	-0.0901078	-0.0538481	3.5+
206	orf19.4882		TFIIE small subunit; involved in RNA polymerase II transcription initiation; Spider biofilm induced	0.319376	1.34075	4+
2365	orf19.4884	WOR1	Transcription factor ("master switch") of white-opaque phenotypic switching; required to establish and maintain the opaque state; opaque-specific, nuclear; regulates its own expression; suggested role in regulation of adhesion factors	-0.161818	-0.131274	4+
3802	orf19.4887	ECM21	Predicted regulator of endcytosis of plasma membrane proteins; fluconazole induced, alkaline induced by Rim101; repressed by caspofungin and in azole-resistant strain overexpressing MDR1; flow model, rat catheter and Spider biofilm induced	-0.0779322	-0.16239	NA
1520	orf19.4889		Predicted MFS family membrane transporter, member of the drug:proton antiporter (12 spanner) (DHA1) family; Spider biofilm induced	0.240542	-0.0581319	0+
1243	orf19.4892	TPK1	cAMP-dependent protein kinase catalytic subunit; Tpk2 isoform; control of morphogenesis and stress response; WT nuclear localization requires Bcy1; produced during stationary, not exponential growth; rat catheter and Spider biofilm induced	-0.117305	-0.145269	2+	Y
2407	orf19.4897		Putative phosphatidylinositol transporter; Spider biofilm repressed	-0.139648	-0.181235	0+
1865	orf19.4898		Putative protein of unknown function; induced by prostaglandins	0.112399	-0.0513198	0+
2753	orf19.4899	GCA1	Extracellular/plasma membrane-associated glucoamylase; expressed in rat oral infection; regulated by carbohydrates, pH, galactose; promotes biofilm matrix formation; flow model biofilm induced; Bcr1 repressed in RPMI a/a biofilms	0.0540327	0.514019	0	Y
2340	orf19.4905		Putative MFS transporter; Hap43p-induced gene; also regulated by regulated by Sef1p and Sfu1p; repressed in a ssr1 null mutant	-0.162124	-0.128571	0+
1213	orf19.4906		Putative adhesin-like protein; positively regulated by Tbf1; Spider biofilm induced	-0.242983	-0.0737329	0+
2387	orf19.4907		Putative protein of unknown function; Hap43p-repressed gene; increased transcription is observed upon fluphenazine treatment; possibly transcriptionally regulated by Tac1p; induced by nitric oxide; fungal-specific (no human/murine homolog	-0.273566	-0.187674	2+
2021	orf19.4912		Ortholog(s) have ubiquitin protein ligase binding activity, role in ubiquitin-dependent endocytosis and Golgi apparatus, clathrin-coated vesicle, cytosol, nucleus, plasma membrane localization	-0.0838441	-0.0261953	3+
1131	orf19.4916		Protein of unknown function; induced by alpha pheromone in SpiderM medium	0.534171	0.38633	0+
1398	orf19.4916		Protein of unknown function; induced by alpha pheromone in SpiderM medium	-0.0298366	-0.178723	2+
1399	orf19.4921		Ortholog of Candida dubliniensis CD36 : CD36_12030 and Candida albicans WO-1 : CAWG_00152	0.0445406	0.0456693	0+
4174	orf19.4922		Ortholog(s) have Rab GTPase binding activity and Golgi apparatus, endoplasmic reticulum localization	0.0753466	0.26755	NA
3434	orf19.4923		Predicted membrane transporter; sugar porter (SP) family member, major facilitator superfamily; caspofungin induced; Spider biofilm induced	-0.118717	-0.204293	0+
1168	orf19.4927	BNI1	Formin; role in cytoskeletal organization, cell polarity; role in systemic virulence in mouse; cell-cycle regulated localization to site of polarized growth, bud neck; localizes to Spitzenkorper of hyphae, minor localization at septum	0.0578442	-0.00545597	0+
4195	orf19.4929		Ortholog(s) have translation regulator activity and role in RNA metabolic process, aerobic respiration, mitochondrial respiratory chain complex IV biogenesis, positive regulation of mitochondrial translational initiation	-0.797186	0.352047	NA
1547	orf19.4930	SPC3	Essential protein; similar to S. cerevisiae Spc3p, a component of the signal peptidase complex required for signal peptidase activity; predicted integral ER membrane protein; complements spc3 and suppresses sec61 S. cerevisiae mutants	0.0869702	1.04426	4+
2038	orf19.4932		Ortholog(s) have role in mitochondrial translation and mitochondrion localization	0.112589	0.0358294	2+
1448	orf19.4933	FAD3	Omega-3 fatty acid desaturase; role in production of alpha-linolenic acid, a major component of membranes; caspofungin induced; Plc1-regulated; colony morphology-related gene regulation by Ssn6; Spider biofilm induced	0.555425	0.763004	0+
887	orf19.4937	CHS3	Major chitin synthase of yeast and hyphae; synthesizes short-chitin fibrils; Chs4-activated; transcript induced at yeast-hyphal transition; Chs1 and Chs2, but not Chs3, are inhibited by the protoberberine HWY-289; Spider biofilm induced	0.162617	0.00170139	3+
2484	orf19.4939		Ortholog(s) have guanyl-nucleotide exchange factor activity, role in Golgi to endosome transport, endocytosis, protein targeting to vacuole and Golgi apparatus, cytosol, endosome, extrinsic to membrane, trans-Golgi network localization	0.251667	0.152165	1+
1560	orf19.494		Putative RNA-binding protein; role in assembly of box H/ACA snoRNPs and thus pre-rRNA processing; Spider biofilm induced	0.0934042	0.0932255	3.5+
2053	orf19.4940		Putative histidine permease; fungal-specific (no human or murine homolog); Hap43p-induced gene	-0.0244739	0.0978262	0+
4216	orf19.4941	TYE7	bHLH transcription factor; control of glycolysis; required for biofilm formation; hyphally regulated by Cph1, Cyr1; flucytosine, Hog1 induced; amphotericin B, caspofungin repressed; induced in flow model biofilm and planktonic cultures	0.606166	0.574942	NA	Y
2483	orf19.4943	PSA2	Mannose-1-phosphate guanyltransferase; Hap43, macrophage-repressed; stationary phase enriched protein; Spider biofilm induced	-0.225058	-0.169244	0+	Y
2052	orf19.4945	MSH6	Protein similar to S. cerevisiae Msh6p, which is involved in mismatch repair; repressed under Cdc5p depletion; Hap43p-induced gene	0.150058	-0.12888	1+
1574	orf19.4950	AKR1	Ankyrin-repeat protein; induced by fluphenazine	-0.216203	0.0736227	0+
1076	orf19.4953		Putative ATPase; predicted role in ER-associated protein catabolism; induced during chlamydospore formation in both C. albicans and C. dubliniensis	0.0290744	-0.0388617	0+
3804	orf19.4958	ECM25	Non-essential protein involved in cell morphogenesis	0.306612	0.107903	NA
2063	orf19.496		Ortholog(s) have DNA-dependent ATPase activity, dinucleotide insertion or deletion binding, guanine/thymine mispair binding activity, role in mismatch repair, mitochondrial DNA repair and mitochondrion localization	-0.140038	-0.0423265	0
3805	orf19.4961	STP2	Amino-acid-regulated transcription factor; activates transcription of amino acid permease genes; activated by amino-acid-induced proteolytic processing (Ssy1, Csh3 dependent); required for alkalinization of medium; Spider biofilm induced	-0.0664935	0.377925	NA
3807	orf19.4967	COX19	Putative cytochrome c oxidase assembly protein; Plc1-regulated; rat catheter biofilm induced	0.12297	-0.180498	NA
2572	orf19.498		Putative mitochondrial ribosomal component of the small subunit; possibly an essential gene, disruptants not obtained by UAU1 method; Spider biofilm repressed	-0.0685346	-0.341945	3+
1388	orf19.4981		Ortholog(s) have role in fungal-type cell wall organization and endoplasmic reticulum localization	-0.415522	0.00184667	0+
1470	orf19.4984		Has domain(s) with predicted cation binding, chitin binding, chitinase activity and role in cell wall macromolecule catabolic process, chitin catabolic process	-0.281711	0.0507273	1+
2176	orf19.4985	GUP1	Putative O-acyltransferase with a role in glycerol uptake; functionally complements growth of S. cerevisiae gup1 mutant under salt stress; required for normal ergosterol distribution, hyphal growth, biofilm formation	-0.0414855	-0.125217	0+	Y
2175	orf19.5004	RAD54	Putative DNA-dependent ATPase involved in DNA repair; induced under hydroxyurea treatment; plays an essential role during mitotic growth; mutants display aberrant cell and nuclear morphology	-0.104127	-0.235938	0+
2174	orf19.5005	OSM2	Putative mitochondrial fumarate reductase; regulated by Ssn6p, Gcn2p, and Gcn4p; Hog1p-downregulated; stationary phase enriched protein; Hap43p-repressed gene	-0.133284	-0.0576939	0+
1563	orf19.5006.1		Ortholog(s) have SNAP receptor activity and role in Golgi to plasma membrane transport, cell cycle cytokinesis, endocytosis, exocytosis, vesicle fusion	-0.0607045	-0.0736749	0+
4053	orf19.5016		Ortholog(s) have role in cellular response to UV and cytosol, nucleus localization	0.100647	0.360185	NA
2170	orf19.5023	DAL7	Putative allantoate permease; mutant is viable	-0.13285	-0.155594	0+
2169	orf19.5025	MET3	ATP sulfurlyase; sulfate assimilation; repressed by Met, Cys, Sfu1, or in fluconazole-resistant isolate; Hog1, caspofungin, white phase-induced; induced on biofilm formation, even in presence of Met and Cys; Spider, F-12/CO2 biofilm induced	-0.164377	0.015573	0+
2168	orf19.5026		C2H2 transcription factor; Spider biofilm induced	0.246603	0.225944	3+
2607	orf19.5029	MODF	Ortholog(s) have mitochondrion localization	0.0688192	0.0659341	0+
2606	orf19.5031	SSK1	Response regulator of two-component system; role in oxidative stress response, cell wall biosynthesis, virulence, hyphal growth on solid media; expressed in hyphae and yeast; peroxisomal targeting sequence (PTS1); Spider biofilm induced	-0.0226599	0.305948	0+
2373	orf19.5037	HRQ2	Protein of unknown function; mutants are viable; rat catheter and Spider biofilm induced	-0.0635611	-0.15951	0+
1150	orf19.5038		Predicted tRNA (guanine) methyltransferase activity; Spider biofilm induced	-0.151142	-0.111622	1+
1272	orf19.5043		Ortholog of C. parapsilosis CDC317 : CPAR2_403770, Debaryomyces hansenii CBS767 : DEHA2G16962g, Candida dubliniensis CD36 : CD36_43610 and Pichia stipitis Pignal : PICST_30926	0.16904	0.207478	1+
208	orf19.5053		Ortholog(s) have acetyltransferase activity, chromatin binding activity	0.33032	0.501472	2+
2375	orf19.5058	SMI1	Cell wall biosynthesis protein; Hap43, caspofungin-repressed; Cyr1-induced in hyphal cells; reduced biofilm cell wall glucan in mutant; possibly essential (UAU1 method); flow model biofilm induced	-0.121313	-0.128124	0+	Y
1620	orf19.5061	ADE5,7	Phosphoribosylamine-glycine ligase and phosphoribosylformylglycinamidine cyclo-ligase; interacts with Vps34p; required for hyphal growth and virulence; flucytosine induced; not induced in GCN response, in contrast to S. cerevisiae ortholog	0.12735	0.0246212	3.5+
1904	orf19.5064	MRPL3	Ribosomal protein of the large subunit, mitochondrial; repressed in core stress response; protein present in exponential and stationary growth phase yeast cultures	-0.232994	-0.274681	3.5+
4263	orf19.5067		Predicted nuclear exosome-associated nucleic acid binding protein; rat catheter and Spider biofilm induced	0.0549542	0.214405	NA
3104	orf19.5071	NRP1	Ortholog(s) have cytoplasmic stress granule, nucleolus localization	-0.12103	0.189924	3+
4284	orf19.5078		Protein of unknown function; Hap43-repressed gene	-0.139755	-0.0201717	NA
1507	orf19.5079	CDR4	Putative ABC transporter superfamily; fluconazole, Sfu1, Hog1, core stress response induced; caspofungin repressed; fluconazole resistance not affected by mutation or correlated with expression; rat catheter and flow model biofilm induced	0.0105084	0.00432996	0+
3103	orf19.5087	BUD6	Protein required for Spitzenkorper formation in hyphal cells (wild-type localization of Mlc1p to the Spitzenkorper); localizes to polarisome	0.033675	0.528122	2+
1562	orf19.5098	NTG1	Protein with strong similarity to both S. cerevisiae Ntg1 and Ntg2 DNA repair glycosylases; transcript induced by iron; Hap43-repressed gene; Spider biofilm induced	-0.103577	0.0682764	1+
2424	orf19.51		Ortholog(s) have role in mitochondrion organization, translational initiation and eukaryotic translation initiation factor 3 complex localization	-0.0257654	0.0183811	1+
1837	orf19.5102	PLB5	Putative GPI-linked phospholipase B, fungal-specific (no mammalian homolog); null mutation eliminates cell-associated phospholipase A2 activity and attenuates virulence; fluconazole-repressed	-0.0214381	-0.0993751	2+
2903	orf19.5103		Protein with a predicted phosphoglycerate mutase family domain; Hap43-repressed; clade-associated gene expression; induced by hypoxia	0.217812	0.315944	1+
3449	orf19.511		Ortholog(s) have ribosylnicotinamide kinase activity, role in NAD biosynthesis via nicotinamide riboside salvage pathway, nicotinamide riboside metabolic process and cytosol, nucleus localization	-0.131495	0.0818168	0+
781	orf19.5117	OLE1	Fatty acid desaturase, essential protein involved in oleic acid synthesis; required for aerobic hyphal growth and chlamydospore formation; subject to hypoxic regulation; fluconazole-induced; caspofungin repressed; Hap43p-induced	-0.123267	0.627616	4+
1032	orf19.5118	SDS24	Protein similar to S. cerevisiae Sds24 involved in cell separation during budding; transcript regulated by Mig1 and Tup1; fluconazole-induced; flow model biofilm induced	-0.127763	-0.015581	0+
1074	orf19.5131		Ortholog of S. cerevisiae Gid7, a GID complex protein; involved in proteasome-dependent catabolite inactivation of fructose-1,6-bisphosphatase; Hap43-repressed gene	0.283746	0.289534	0+
2566	orf19.5159	DUG3	Putative glutamine amidotransferase (GATase II); role in glutathione catabolism;	-0.107006	-0.0302106	0+
2565	orf19.5160		Ortholog(s) have role in G1/S transition of mitotic cell cycle, TOR signaling cascade, dephosphorylation, regulation of chromosome segregation, tRNA wobble uridine modification and centromeric heterochromatin, cytosol, nucleus localization	0.0691156	-0.0728362	0+
921	orf19.517	HAP31	CCAAT-binding transcription factor; regulates CYC1; required for resistance to rapamycin, copper; induced in high iron; repressed in low iron; Sef1, Sfu1, and Hap43 regulated; rat catheter and Spider biofilm induced	0.0347268	-0.160212	0+
1144	orf19.5171	PMT1	Protein mannosyltransferase (PMT), required for virulence in mouse systemic infection and for adhesion to epithelial cells; role in hyphal growth and drug sensitivity; Als1p, Sec20p, Kre9p, Pir1p are substrates; one of 5 PMT family members	-0.0347824	0.579183	1+	Y
198	orf19.5198	NOP4	Putative nucleolar protein; Hap43-induced; mutation confers hypersensitivity to 5-fluorocytosine (5-FC), 5-fluorouracil (5-FU), and tubercidin (7-deazaadenosine); represses in core stress response	#N/A	#N/A	3+
1587	orf19.52		Ortholog(s) have role in cellular iron ion homeostasis and mitochondrion localization	0.0385389	-0.163179	1+
2377	orf19.5205		Protein of unknown function; Hap43-repressed gene	0.408595	-0.011677	0+
1304	orf19.5206		Putative chaperone protein; role in the assembly of box H/ACA snoRNPs and thus for pre-rRNA processing; Spider biofilm induced	0.131882	-0.0456802	2+
4261	orf19.5213		Putative protein of unknown function; transcript is upregulated in clinical isolates from HIV+ patients with oral candidiasis	-0.259362	0.19167	NA
3826	orf19.5214	VPS33	Ortholog(s) have ATP binding, phosphatidylinositol binding activity	-0.0502963	0.0728796	NA
1809	orf19.5220		Putative RNA exonuclease; induced in a ssr1 null mutant	-0.343209	-0.179159	0+
1810	orf19.5224		Putative serine/threonine protein kinase; predicted role in sphingolipid-mediated signaling pathway that controls endocytosis; mRNA binds She3 and is localized to hyphal tips	-0.099812	0.00566161	0+
1689	orf19.5228	RIB3	3,4-Dihydroxy-2-butanone 4-phosphate synthase; homodimeric enzyme of riboflavin biosynthesis; converts ribulose 5-phosphate to L-3,4-dihydroxy-2-butanone 4-phosphate; transcription regulated on yeast-hyphal switch, macrophage interaction	0.0136673	-0.0711148	3+
1188	orf19.5229		Ortholog(s) have 3'-5'-exoribonuclease activity, endoribonuclease activity, tRNA binding activity	-0.00843933	0.44981	4+
1467	orf19.5234	RBD1	Rhomboid-like protein; similar to putative intramembrane serine proteases; role in filamentous growth; Gcn4-regulated; caspofungin repressed; Spider biofilm induced	0.146373	0.0111839	0+
1466	orf19.5238		Ortholog(s) have cytosol, nucleus localization	0.0413701	-0.00417377	0+
2540	orf19.524		Ortholog(s) have role in mitotic sister chromatid segregation and cytosol, nucleus localization	-0.0382669	-0.140288	0+
2137	orf19.5243	TRP3	Putative bifunctional enzyme with predicted indole-3-glycerol-phosphate synthase and anthranilate synthase activities; regulated by Gcn2p and Gcn4p	-0.179159	0.0852488	4+
4095	orf19.5250		Has domain(s) with predicted cofactor binding, nucleotide binding activity	-0.150062	-0.109491	NA
2136	orf19.5253		Has domain(s) with predicted ATP binding, protein serine/threonine kinase activity and role in protein phosphorylation	-0.648221	0.327275	0+
2135	orf19.5263	SER33	Predicted enzyme of amino acid biosynthesis; Gcn4p-regulated; upregulated in biofilm; protein present in exponential and stationary growth phase yeast cultures; S. cerevisiae ortholog is Gcn4p regulated	0.306792	0.255209	1+
2134	orf19.5265	KIP4	S. cerevisiae Smy1 ortholog; Tn mutation affects filamentous growth; filament induced; has Mob2-dependent hyphal regulation; regulated by Nrg1, Tup1; oralpharyngeal candidasis induced; Spider biofilm induced	0.0254602	-0.0437181	0+
3873	orf19.5270		Protein of unknown function; rat catheter biofilm induced	0.0632741	-0.173465	NA
3887	orf19.5278		Protein of unknown function; Spider biofilm induced	0.0719577	0.358984	NA
2394	orf19.5291		Ortholog(s) have role in phospholipid metabolic process and endoplasmic reticulum localization	-0.034218	0.0576473	0+
2393	orf19.5292	AXL2	Ortholog of S. cerevisiae Axl2; a plasma membrane protein involved in determination of budding pattern; O-glycosylated by Pmt4; mutant is viable	0.243623	0.0802516	0+
1407	orf19.5293		Ortholog of C. parapsilosis CDC317 : CPAR2_402940, Candida tenuis NRRL Y-1498 : CANTEDRAFT_114940, Debaryomyces hansenii CBS767 : DEHA2C09196g and Candida dubliniensis CD36 : CD36_43710	-0.0578641	0.095193	0+
1038	orf19.5294	PDB1	Putative pyruvate dehydrogenase; fluconazole-induced; protein level decreases in stationary phase cultures; Spider biofilm repressed	-0.328348	-0.266673	4+
1406	orf19.5295		Protein with a predicted endonuclease/exonuclease/phosphatase family domain and a carbon catabolite repressor protein 4 domain; induced by alpha pheromone in SpiderM medium	0.0558658	-0.0541539	2+
1223	orf19.5297		Ortholog(s) have phosphatidylinositol-3-phosphate binding, phosphatidylinositol-5-phosphate binding activity	0.0625662	-0.407674	4+
3302	orf19.5307	JEN2	Dicarboxylic acid transporter; regulated by glucose repression; induced by Rgt1; disruptants not obtained by UAU1 method; rat catheter and Spider biofilm induced	-0.209031	0.0474242	3+
1139	orf19.5323	MDH1-3	Predicted malate dehydrogenase; farnesol regulated; protein present in exponential and stationary growth phase yeast; Hap43p-repressed gene	0.147996	-0.0212627	2+
1473	orf19.5326		Putative transcription factor with zinc finger DNA-binding motif; possible ortholog of S. cerevisiae Mig2p	0.139857	0.221766	0+
1474	orf19.5337	UBC15	Putative E2 ubiquitin-conjugating enzyme	-0.107944	0.188428	0
1475	orf19.5352		Protein with a predicted magnesium transporter domain; mutants are viable	-0.245636	-0.0491803	0+
353	orf19.5360	RPC11	Putative RNA polymerase III subunit C11; repressed in core caspofungin response; Spider biofilm induced	#N/A	#N/A	3.5+
988	orf19.5364		Putative pre-mRNA splicing factor; intron in 5'-UTR; possibly an essential gene, disruptants not obtained by UAU1 method	0.124195	0.0895716	1+
2257	orf19.5384	CHS8	Chitin synthase required for synthesis of long-chitin fibrils; nonessential; 8 or 9 membrane spanning regions; mRNA present in yeast and hyphae; induced during cell wall regeneration; fungal-specific (no human or murine homologs)	-0.0799608	0.284305	0+
1484	orf19.5392	NGT1	N-acetylglucosamine (GlcNAc)-specific transporter; role in GlcNAc (but not serum) induced hyphal growth; localizes to plasma membrane; induced by GlcNAc, macrophage engulfment; 12 transmembrane, major facilitator superfamily	0.0790853	0.0571444	0+
1485	orf19.5393		Putative cysteine sulfinate decarboxylase; transcript positively regulated by Tbf1; Spider biofilm induced	-0.231881	-0.301337	0+
2541	orf19.541		Has domain(s) with predicted oxidoreductase activity, acting on paired donors, with incorporation or reduction of molecular oxygen, 2-oxoglutarate as one donor, and incorporation of one atom each of oxygen into both donors activity	0.182443	-0.152347	1+
1207	orf19.5411		Ortholog(s) have NEDD8 ligase activity, role in protein neddylation, regulation of mitotic cell cycle and cytosol, nucleus localization	-0.165607	-0.014781	3.5+
712	orf19.5416	ESA1	Subunit of the NuA4 histone acetyltransferase complex; member of MYST family; Spider biofilm induced	-0.0804569	-0.120555	2+
2639	orf19.5418		Ortholog(s) have role in ER to Golgi vesicle-mediated transport and endoplasmic reticulum localization	-0.0438393	0.0971824	3+
2260	orf19.5426		Putative patatin-like phospholipase; macrophage-regulated gene; fungal-specific (no human or murine homolog)	-0.0649011	-0.219083	0+
662	orf19.5436	UTP8	Essential nucleolar protein; involved in tRNA export from the nucleus and ribosomal small subunit biogenesis; physically interacts with TAP-tagged Nop1; Spider biofilm induced	#N/A	#N/A	4+
2261	orf19.5437	RHR2	Glycerol 3-phosphatase; roles in osmotic tolerance, glycerol accumulation in response to salt; Spider/flow model biofilm induced; regulated by macrophage, stress, yeast-hyphal switch, pheromone, Gcn4, Hog1, Nrg1, Tup1	0.00929648	0.167328	0+	Y
1173	orf19.5440	RPT2	Putative ATPase of the 19S regulatory particle of the 26S proteasome; oxidative stress-induced via Cap1; Spider biofilm repressed	0.304141	0.364844	4+
1191	orf19.5447	HGT19	Putative MFS glucose/myo-inositol transporter; 20 member family; 12 transmembrane segments, extended N terminus; expressed in rich medium; Hap43, phagocytosis, rat catheter, Spider and flow model biofilm induced	-0.0944928	-0.289332	2+
2263	orf19.5455		Ortholog(s) have mRNA binding, small GTPase regulator activity	-0.103799	-0.0568944	0+
3332	orf19.5459		mRNA polyadenylation regulating protein; Hap43-repressed; transcript is upregulated in RHE model of oral candidiasis and in clinical isolates from HIV+ patients with oral candidiasis; Spider biofilm repressed	0.0624624	0.152462	0+
192	orf19.5463	SEC6	Predicted subunit of the exocyst complex, involved in exocytosis; localizes to a crescent on the surface of the hyphal tip; Hap43p-repressed gene, overlaps orf19.5464 and orf19.5465	-0.0034168	0.798812	4+
1081	orf19.548	CDC10	Septin, required for wild-type cell, hyphal, or chlamydospore morphology; role in virulence and kidney tissue invasion in mouse infection; forms ring at sites of cell division and filaments in mature chlamydospore; Spider biofilm repressed	0.103002	-0.101009	0+
1857	orf19.5480	ILV1	Putative threonine dehydratase; regulated by Gcn4 and Gcn2; induced by amino acid starvation (3-AT); protein present in yeast exponential and stationary phase cultures; early-stage flow model biofilm induced	0.0905922	0.089222	3+
1859	orf19.5484	SER1	Putative 3-phosphoserine aminotransferase; predicted role in serine and glycine biosynthesis; protein present in exponential and stationary yeast growth phases; Spider biofilm repressed	-0.144808	-0.161138	0+
1899	orf19.5495		Putative RNA-binding protein; induced by alpha pheromone in SpiderM medium	-0.000256476	-0.00867517	0+
2429	orf19.5496	AVT1	Putative vacuolar transporter; promoter bound by a1p and alpha2p by ChIP-chip analysis	-0.122504	-0.063685	0+
3420	orf19.5498	EFH1	APSES transcription factor; homodimer; minor role in transcriptional regulation vs Efg1; regulates filamentous growth, phenotypic switch; EFG1 and EFH1 genetically interact; expression interferes with mouse intestinal tract colonization	1.01044	-0.226779	0+
1417	orf19.5499		Has domain(s) with predicted 4-hydroxyphenylpyruvate dioxygenase activity and role in aromatic amino acid family metabolic process, oxidation-reduction process	-0.26448	0.229124	3+
1048	orf19.5505	HIS7	Putative imidazole glycerol phosphate synthase; histidine biosynthesis; no human/murine homolog; transcription induced by histidine starvation; regulated by Gcn2p and Gcn4p; higher protein level in stationary phase	-0.155533	-0.032184	4+
1373	orf19.551		Ortholog of C. parapsilosis CDC317 : CPAR2_204170, Candida tenuis NRRL Y-1498 : CANTEDRAFT_110235, Debaryomyces hansenii CBS767 : DEHA2F17072g and Candida dubliniensis CD36 : CD36_29980	0.267687	0.250111	1+
1119	orf19.5517		Similar to alcohol dehydrogenases; induced by benomyl treatment, nitric oxide; induced in core stress response; oxidative stress-induced via Cap1; Spider biofilm repressed	-0.0668193	-0.0731133	1+
2421	orf19.5521	ISA1	Putative mitochondrial iron-sulfur protein; alkaline repressed; induced in high iron; regulated by Sef1, Sfu1, Hap43; Spider biofilm induced	-0.165649	-0.251086	4+
1025	orf19.553		Predicted membrane transporter, member of the drug:proton antiporter (12 spanner) (DHA1) family, major facilitator superfamily (MFS)	-0.0901151	-0.0651042	0+
1552	orf19.5530	NAB3	Putative nuclear polyadenylated RNA-binding protein; flucytosine repressed	-0.0127223	-0.142377	0+
2337	orf19.5532		Protein of unknown function; Spider biofilm induced	-0.0656372	-0.0963683	0+
2338	orf19.5534		Protein with a predicted role in mitotic spindle elongation, vesicle-mediated transport; flow model biofilm induced	0.210922	-0.0456033	0+
1093	orf19.5535		Predicted membrane transporter, member of the anion:cation symporter (ACS) family, major facilitator superfamily (MFS)	0.00680191	-0.144274	0+
1851	orf19.5550	MRT4	Putative mRNA turnover protein; Hap43-induced; mutation confers hypersensitivity to tubercidin (7-deazaadenosine); rat catheter biofilm induced	-0.207614	0.242449	2+
2403	orf19.5553		Ortholog(s) have methionine-R-sulfoxide reductase activity, role in cellular response to oxidative stress and cytoplasm, nucleus localization	0.0853121	-0.0984749	0+
1369	orf19.5592		Ortholog of Candida tenuis NRRL Y-1498 : CANTEDRAFT_115187, Candida dubliniensis CD36 : CD36_63980, Candida tropicalis MYA-3404 : CTRG_02719 and Candida albicans WO-1 : CAWG_05060	-0.00172904	-0.150948	3.5+
1008	orf19.5595	SHE3	mRNA-binding protein that localizes specific mRNAs to daughter yeast cells and to hyphal tips; required for normal filamentation and host epithelial cell damage; ortholog of S. cerevisiae She3 but target mRNAs differs	0.0538671	0.206817	0+
2940	orf19.56	ARG2	Putative enzyme of arginine biosynthesis; transcription of genes of arginine biosynthesis pathway, except for ARG2, is induced upon phagocytosis by macrophage	0.318745	0.394431	2+
4078	orf19.5601		Ortholog of C. parapsilosis CDC317 : CPAR2_601360, Candida tenuis NRRL Y-1498 : CANTEDRAFT_108198, Debaryomyces hansenii CBS767 : DEHA2C04136g and Candida dubliniensis CD36 : CD36_63910	-0.140721	0.0169219	NA
962	orf19.5604	MDR1	Plasma membrane MDR/MFS multidrug efflux pump; methotrexate is preferred substrate; overexpression in drug-resistant clinical isolates confers fluconazole resistance; repressed in young biofilms; rat catheter biofilm induced	-0.0994426	-0.129466	1+	Y
2447	orf19.5605		Ortholog(s) have protein binding, bridging, ubiquitin protein ligase binding activity and role in positive regulation of ubiquitin-dependent endocytosis, regulation of intracellular transport	-0.0677795	-0.036256	0+
1941	orf19.5610	ARG3	Putative ornithine carbamoyltransferase; Gcn4-regulated; Hap43-induced; repressed in alkalinizing medium; rat catheter and Spider biofilm induced	-0.198915	-0.115618	2+
2446	orf19.5611		Predicted 3-methylbutanol:NAD(P) oxidoreductase and methylglyoxal reductase (NADPH-dependent); role in ergosterol metabolic process; early stage flow model biofilm induced; Spider biofilm induced	-0.0889452	-0.290553	0+
3376	orf19.5615	AYR2	Putative NADPH-dependent 1-acyl dihydroxyacetone phosphate reductase; shows colony morphology-related gene regulation by Ssn6p	-0.00221691	0.0173527	0+
1915	orf19.5628		Mitochondrial dicarboxylate transporter; possibly an essential gene, disruptants not obtained by UAU1 method	0.203502	0.0667065	0+
3876	orf19.5629	QCR7	Putative ubiquinol-cytochrome-c reductase, subunit 7; Hap43p-repressed gene	-0.149674	-0.0890645	NA
1567	orf19.5630	APA2	Putative ATP adenylyltransferase II; regulated by Gcn4; repressed by amino acid starvation (3-AT); induced by prostaglandins; Hap43-repressed; Spider biofilm repressed	-0.117998	-0.023517	0+
2422	orf19.5634	FRP1	Ferric reductase; alkaline-induced by Rim101; iron-chelation-induced by CCAAT-binding factor; fluconazole-repressed; ciclopirox-, hypoxia-, Hap43-induced; colony morphology-related regulation by Ssn6; Spider and flow model biofilm induced	-0.130083	-0.0954473	0+
1070	orf19.5639	HIS4	Multifunctional enzyme that catalyzes three steps of histidine biosynthesis, with phosphoribosyl-AMP cyclohydrolase, phosphoribosyl-ATP diphosphatase, and histidinol dehydrogenase activities; required for wild-type adhesion to human calls	-0.503802	0.334717	4+
1883	orf19.5640	PEX5	Pex5p family protein; required for PTS1-mediated peroxisomal protein import, fatty acid beta-oxidation; similar to S. cerevisiae Pas10p peroxisomal targeting receptor; macrophage/pseudohyphal-repressed; Hap43p-repressed	-0.0529005	-0.0562587	0+
1884	orf19.5641	CAR2	Ornithine aminotransferase; arginine metabolism; alkaline induced; mutant sensitivite to toxic ergosterol analog, to amphotericin B; exponential and stationary phase yeast; flow model biofilm induced; rat catheter, Spider biofilm repressed	0.027731	0.0359292	0
1885	orf19.5645	MET15	O-acetylhomoserine O-acetylserine sulfhydrylase; sulfur amino acid synthesis; immunogenic; Hog1, adherence-induced; brown color of mutant in Pb(2+) medium a visual selection; chlamydospore formation induced, F-12/CO2 biofilm induced	-0.10208	0.0540567	0+
4156	orf19.5646		Ortholog of S. cerevisiae : YPL034W, C. glabrata CBS138 : CAGL0L06996g, C. parapsilosis CDC317 : CPAR2_402170 and Candida tenuis NRRL Y-1498 : CANTEDRAFT_137348	-0.0856642	-0.340018	NA
4178	orf19.5655		Has domain(s) with predicted 2 iron, 2 sulfur cluster binding, iron ion binding, oxidoreductase activity, oxidoreductase activity and acting on paired donors, more	0.207618	0.0394206	NA
2551	orf19.5655		Has domain(s) with predicted 2 iron, 2 sulfur cluster binding, iron ion binding, oxidoreductase activity, oxidoreductase activity and acting on paired donors	0.0227629	-0.183426	0+
1551	orf19.5657	SWI1	Protein involved in transcription regulation; ortholog of S. cerevisiae Swi1p, which is a subunit of the SWI/SNF chromatin remodeling complex; interacts with Snf2p; SWI/SNF complex is essential for hyphal growth and virulence	-0.0773341	1.57052	4+
2552	orf19.5658	MNN10	Ortholog(s) have alpha-1,6-mannosyltransferase activity, role in barrier septum assembly and alpha-1,6-mannosyltransferase complex localization	0.0235051	0.0292994	0+
2553	orf19.5661	PTC7	Protein phosphatase, type 2C; has S/T phosphatase activity, Mn2+/Mg2+ dependent; predicted membrane-spanning segment and mitochondrion-targeting signal	-0.246945	-0.105257	0+
3443	orf19.5662	PEP7	Vesicle transport protein; acts in endosomal transport; roles in metal ion resistance, virulence, adhesion, hyphal growth, chlamydospore formation; similar to S. cerevisiae Pep7p	0.0374095	-0.0844291	0+
2554	orf19.5663	RCH1	Plasma membrane protein; involved in regulation of cytosolic calcium homeostasis; null mutation confers sensitivity to calcium and resistance to azoles and terbinafine; rat catheter biofilm induced	-0.00562757	-0.18993	0+
4198	orf19.5664	HOF1	Ortholog of S. cerevisiae Hof1; a protein localized to the bud neck and required for cytokinesis in S. cerevisiae; periodic mRNA expression, peak at cell-cycle G2/M phase; mutant is viable	0.218006	0.239331	NA
2555	orf19.5665		Ortholog(s) have D-arabinose 1-dehydrogenase [NAD(P)+] activity and role in dehydro-D-arabinono-1,4-lactone biosynthetic process	0.03465	-0.173872	0+
3189	orf19.5667	MNR2	Putative ion transporter; fungal-specific (no human or murine homolog)	0.166023	-0.143296	0+
1094	orf19.5671		Ortholog(s) have role in actin cortical patch assembly, septin cytoskeleton organization and cellular bud neck, cellular bud tip, mating projection base, mating projection tip localization	-0.0765531	0.000449154	0+
2556	orf19.5672	MEP2	Ammonium permease and regulator of nitrogen starvation-induced filamentation; 11 predicted transmembrane regions; in low nitrogen cytoplasmic C-terminus activates Ras/cAMP and MAPK signal transduction pathways to induce filamentation	0.238542	-0.113319	1+
2557	orf19.5673	OPT7	Putative oligopeptide transporter; possibly transports GSH or related compounds; Hog1-induced; expression of OPT6, -7, or -8 does not suppress defect of mutant lacking OPT1-3; Hap43-repressed; F-12/CO2 early biofilm induced	-0.159025	-0.126205	3.5+
3444	orf19.5676		Ortholog(s) have cytosol, nucleus localization	-0.122881	0.0224909	0+
2558	orf19.5677	DUR4	Putative urea permease; fungal-specific (no human or murine homolog); possibly an essential gene, disruptants not obtained by UAU1 method	-0.0911173	-0.0638265	0+
1908	orf19.568	SPE2	Putative S-adenosylmethionine decarboxylase; Hap43-induced gene; possibly adherence-induced; Spider biofilm induced	0.0228548	-0.0282313	0+
4332	orf19.5680		Protein with predicted hydrolase domains; similar to a universal stress protein family protein; possibly essential, disruptants not obtained by UAU1 method; Spider biofilm repressed	0.200163	0.170326	NA
1896	orf19.5702		Ortholog(s) have cell division site, spindle localization	-0.123158	-0.234121	0+
2947	orf19.5713	YMX6	Putative NADH dehydrogenase; macrophage-downregulated gene; induced by nitric oxide; rat catheter biofilm induced	-0.166675	-0.0882541	0+
1285	orf19.5727		Ortholog of C. parapsilosis CDC317 : CPAR2_601230, Candida tenuis NRRL Y-1498 : CANTEDRAFT_115908, Debaryomyces hansenii CBS767 : DEHA2E12540g and Candida dubliniensis CD36 : CD36_64130	-0.141733	-0.334029	1+
1426	orf19.5728		Putative cytochrome P450; Spider biofilm induced	-0.0873677	-0.0430119	0+
1339	orf19.5729	FGR17	Putative DNA-binding transcription factor; has zinc cluster DNA-binding motif; lacks an ortholog in S. cerevisiae; transposon mutation affects filamentous growth; Hap43p-repressed gene	0.0523136	-0.00540302	0+
1299	orf19.5730		Putative phenylacrylic acid decarboxylase; clade-associated gene expression	0.0366659	0.0241347	0+
1115	orf19.5735	CDC50	Putative endosomal protein; induced by Mnl1p under weak acid stress	0.0772075	0.445689	4+
2363	orf19.5747		Ortholog(s) have structural constituent of ribosome activity and mitochondrial small ribosomal subunit localization	0.0555671	-0.0933935	2+
1659	orf19.5749	SBA1	Similar to co-chaperones; induced in high iron; farnesol-, heavy metal (cadmium) stress-induced; protein level decreases in stationary phase cultures; Hap43-repressed	-0.0840858	-0.102847	0+
1056	orf19.5752		Ortholog(s) have ubiquitin-protein ligase activity, role in SCF-dependent proteasomal ubiquitin-dependent protein catabolic process and SCF ubiquitin ligase complex localization	-0.126307	-0.0208489	0+
1605	orf19.5755		Ortholog(s) have cyclin-dependent protein kinase regulator activity	-0.0636382	-0.277617	1+
3379	orf19.5757		Ortholog(s) have cytoplasm, nucleus localization	0.0231167	0.0621862	0+
1521	orf19.5759	SNQ2	Protein similar to S. cerevisiae Snq2p transporter; member of PDR subfamily of ABC family; transposon mutation affects filamentation; benomyl-induced transcription; detected at yeast-form cell plasma membrane by mass spec	0.257948	0.177001	0+
3085	orf19.5760	IHD1	GPI-anchored protein; alkaline, hypha-induced; regulated by Nrg1, Rfg1, Tup1 and Tsa1, Tsa1B in minimal media at 37; oralpharyngeal candidasis induced ; Spider biofilm induced; regulated in Spider biofilms by Tec1, Efg1, Ndt80, Rob1, Brg1	-0.14877	-0.115839	0+
3882	orf19.577		Predicted protein tyrosine phosphatase; rat catheter biofilm induced	0.172093	0.517072	NA
1041	orf19.5772		Ortholog(s) have role in histone exchange and Swr1 complex localization	-0.025465	-0.132431	2+
1922	orf19.5777		Protein of unknown function; F-12/CO2 early biofilm induced	0.0843075	0.140952	0+
1909	orf19.578		Ortholog(s) have Rab GTPase activator activity, role in actin filament organization and cellular bud tip, cytosol, incipient cellular bud site, polarisome localization	0.878306	1.35054	0+
2963	orf19.5780		Putative protein of unknown function; Hap43p-repressed gene	-0.182453	-0.0843727	0+
2439	orf19.5782		Ortholog(s) have mitochondrion localization	0.162605	-0.138011	1+
1423	orf19.5784	AMO1	Putative peroxisomal copper amine oxidase	-0.234416	-0.164106	0+
1923	orf19.5789	ADE8	Putative phosphoribosylglycinamide formyl-transferase, enzyme of amino acid biosynthesis pathway; upregulated in biofilm; S. cerevisiae ortholog is Gcn4p regulated; protein enriched in stationary phase yeast-form cultures	-0.10091	0.0517672	3.5+
3147	orf19.5796	SHE9	Protein with similarity to S. cerevisiae She9p, which inhibits growth when overproduced; gene has possible growth-regulation element; fungal-specific (no human or murine homolog)	-0.103625	0.0242435	0+
1888	orf19.58	RRP6	Putative nuclear exosome exonuclease component; Hap43p-induced gene; mutation confers hypersensitivity to 5-fluorocytosine (5-FC), 5-fluorouracil (5-FU), and tubercidin (7-deazaadenosine)	-0.135407	0.162759	2+
1053	orf19.5808		Ortholog(s) have protein-lysine N-methyltransferase activity, role in negative regulation of G2/M transition of mitotic cell cycle, peptidyl-lysine methylation and cytosol, nucleus localization	0.421133	0.354148	0+
3879	orf19.5812		Ortholog of S. cerevisiae Ett1, a nuclear protein that inhibits replication of Brome mosaic virus; early-stage flow model biofilm induced	-0.00594511	-0.05135	NA
1839	orf19.5815	SCT2	Putative glycerol-3-phosphate acyltransferase; fungal-specific (no human or murine homolog)	-0.0648582	0.0129237	0+
2904	orf19.5816	EBP7	Putative NADPH oxidoreductase; mutation confers hypersensitivity to toxic ergosterol analog; oxidative stress-induced via Cap1p	-0.266441	-0.170056	1+
1838	orf19.5818	SUR2	Putative ceramide hydroxylase; predicted enzyme of sphingolipid biosynthesis; regulated by Tsa1, Tsa1B under H2O2 stress conditions; Spider and flow model biofilm induced	-0.136857	-0.188315	0+
3076	orf19.5826		Has domain(s) with predicted amino acid transmembrane transporter activity, role in amino acid transmembrane transport and membrane localization	-0.00171419	-0.0193383	0+
1184	orf19.5827	BUB2	Ortholog(s) have GTPase activator activity	0.0640965	0.0925401	3+
2013	orf19.583		Indoleamine 2,3-dioxygenase (IDO); rate-limiting enzyme of tryptophan catabolism via kynurenine; enzyme inhibition by 1-methyl-D,L-tryptophan increases hyphal growth; expressed in yeast and hyphae; rat catheter and Spider biofilm induced	0.32683	0.175129	0
2493	orf19.5832	HPT1	Putative hypoxanthine-guanine phosphoribosyltransferase; protein abundance affected by URA3 expression in the CAI4 strain background; protein level decreases in stationary phase; Spider biofilm induced	-0.340064	-0.121176	0+
2491	orf19.5838		Ortholog(s) have phosphoserine phosphatase activity, role in L-serine biosynthetic process and cytoplasm, nucleus localization	0.0173773	0.322614	4+
2490	orf19.5839	PDR17	Fungal-specific protein (no human or murine homolog); role in sensitivity to fluconazole, specifically	-0.0752159	0.0415618	1+
1930	orf19.5849	CWT1	Zn2Cys6 transcription factor involved in negative regulation of nitrosative stress response; mutant has cell wall defects; transcription increased at stationary phase; has predicted PAS domain; similar to S. cerevisiae Rds2p	0.160139	0.0518579	0+
3896	orf19.585		Ortholog(s) have structural constituent of ribosome activity and mitochondrial large ribosomal subunit localization	0.182336	-0.054917	NA
1939	orf19.5858	EGD2	Nascent polypeptide associated complex protein alpha subunit; soluble protein in hyphae; macrophage/pseudohyphal-induced; protein level decrease in stationary phase cultures; GlcNAc-induced protein; Spider biofilm repressed	0.0054336	0.0456055	0
2982	orf19.5859	DAL8	Putative allantoate permease; fungal-specific (no human or murine homolog)	0.455456	-0.107593	0+
2445	orf19.5862	AFP99	Protein related to arginases; downregulated upon adherence to polystyrene; regulated by Gcn2p and Gcn4p	0.0595494	-0.145912	0+
1940	orf19.5865		Ortholog(s) have RNA-dependent ATPase activity, role in generation of catalytic spliceosome for first transesterification step and U2-type catalytic step 1 spliceosome localization	-0.0159557	-0.0830817	3+
1061	orf19.5869		Ortholog(s) have role in metal ion transport, protein targeting to vacuole, ubiquitin-dependent protein catabolic process and endoplasmic reticulum, fungal-type vacuole membrane localization	-0.096654	-0.0525086	0+
1208	orf19.589	VSP21	Late endosomal Rab small monomeric GTPase involved in transport of endocytosed proteins to the vacuole; involved in filamentous growth and virulence; Spider biofilm induced	0.0428889	0.0114074	0+
4022	orf19.5894		Ortholog of S. cerevisiae : YEL023C, C. glabrata CBS138 : CAGL0I03168g, C. dubliniensis CD36 : Cd36_84380, Candida tenuis NRRL Y-1498 : CANTEDRAFT_101635 and Pichia stipitis Pignal : PICST_19384	0.0596167	0.102488	NA
3371	orf19.5894		Ortholog of S. cerevisiae : YEL023C, C. glabrata CBS138 : CAGL0I03168g, Candida tenuis NRRL Y-1498 : CANTEDRAFT_101635, Candida dubliniensis CD36 : CD36_84380 and Pichia stipitis Pignal : PICST_19384	-0.0570929	-0.00660796	0+
3991	orf19.59	REI1	Putative cytoplasmic pre-60S factor; Hap43-induced; repressed by prostaglandins	0.353659	-0.0458148	NA
3483	orf19.5903	RAX1	Protein with a predicted role in bud site selection; hypha-induced expression; Spider biofilm induced	-0.18063	-0.224153	0+
2315	orf19.5906	ADE2	Phosphoribosylaminoimadazole carboxylase; role in adenine biosynthesis; required for normal growth and virulence in immunosuppressed mouse infection; not induced in GCN response, in contrast to S. cerevisiae ADE2; stationary phase-enriched	0.127237	0.424841	4+
3370	orf19.5915	DUR35	Putative urea transporter	0.0729964	0.0129053	0+
3831	orf19.5917	STP3	Transcription factor; regulates SAP2, OPT1 expression and thereby protein catabolism for nitrogen source; activated via amino-acid-induced proteolytic processing; macrophage/pseudohyphal-repressed; Spider biofilm repressed	0.310732	-0.14534	NA
2658	orf19.5919	MEA1	Protein similar to A. nidulans MesA, which is involved in localization of actin cables; Hap43p-induced gene	-0.0414756	0.0861124	0+
2011	orf19.592		Ortholog of S. cerevisiae YNL092W and S. pombe SPBC1778.07; a putative N2227-like methyltransferase; Hap43-repressed gene	-0.0808284	0.115288	4+
1496	orf19.5924	ZCF31	Zn(II)2Cys6 transcription factor of unknown function; mutant is sensitive to copper and SDS, and resistant to Calcofluor White; required for yeast cell adherence to silicone substrate	0.226172	-0.115029	1+	Y
2657	orf19.5925		Ortholog of S. cerevisiae : AIM6, C. glabrata CBS138 : CAGL0C05533g, C. parapsilosis CDC317 : CPAR2_404550, Candida tenuis NRRL Y-1498 : CANTEDRAFT_115337 and Debaryomyces hansenii CBS767 : DEHA2G13552g	-0.00444217	-0.123445	2+
3368	orf19.5926	ARG11	Putative ornithine transporter of the mitochondrial inner membrane; induced during the mating process	-0.0122838	-0.0740836	3+
2312	orf19.5932		Protein of unknown function; Spider biofilm induced	-0.323991	0.158456	1+
1205	orf19.5934		Ortholog(s) have DNA topoisomerase type I activity	-0.00174552	-0.0285087	0+
1193	orf19.5949	FAS2	Alpha subunit of fatty-acid synthase; required for virulence in mouse systemic infection and rat oropharyngeal infection models; regulated by Efg1; fluconazole-induced; amphotericin B repressed; Spider biofilm repressed	-0.214583	0.271428	4+
3482	orf19.5953		C2H2 transcription factor; predicted regulator of ribosomal protein and biogenesis genes; possibly essential, disruptants not obtained by UAU1 method; rat catheter biofilm induced	0.426464	-0.129504	0+
1181	orf19.5964	ARF2	Putative ADP-ribosylation factor; mutation confers hypersensitivity to Brefeldin A; Spider biofilm repressed	0.798606	1.17266	4+
1286	orf19.5966		Ortholog of Candida albicans WO-1 : CAWG_02810	-0.100739	0.0810591	0+
2655	orf19.5970		Putative DNA repair helicase; transcriptionally induced by interaction with macrophage; fungal-specific (no human or murine homolog)	0.0265453	-0.0636638	0+
3361	orf19.5971		Ortholog of S. cerevisiae : MTC6, C. glabrata CBS138 : CAGL0I01892g, C. parapsilosis CDC317 : CPAR2_405620, Candida tenuis NRRL Y-1498 : CANTEDRAFT_99433 and Debaryomyces hansenii CBS767 : DEHA2B14432g	-0.000415546	-0.144861	1+
3360	orf19.5978		Has domain(s) with predicted nucleotide binding, oxidoreductase activity, zinc ion binding activity and role in oxidation-reduction process	0.17294	-0.0687659	0+
2304	orf19.5986	THI4	Thiamine biosynthetic enzyme precursor; repressed during the mating process; stationary phase enriched protein; Spider biofilm induced	-0.133617	-0.0187929	1+
1092	orf19.5994	RHB1	Putative small G protein from the Ras superfamily involved in cell wall integrity and control of filamentous growth under nitrogen starvation	0.247165	0.266669	2+
1918	orf19.600	TRK1	Potassium transporter; mediates K+ and Cl- influx; role in sensitivity to cationic antimicrobial peptides, not by direct uptake, possibly related to membrane permeability; contains 5' UTR intron; Spider biofilm induced	-0.0379987	0.1253	1+
3732	orf19.6000	CDR1	Multidrug transporter of ABC superfamily; transports phospholipids in an in-to-out direction; induced by beta-estradiol, progesterone, corticosteroid, or cholesterol; Spider biofilm induced	-0.081591	0.403392	NA	Y
2654	orf19.6007		Predicted fatty acid acyl transferase-related protein domain; repressed by prostaglandins	-0.225614	-0.027689	0+
1942	orf19.6011	SIN3	Protein similar to S. cerevisiae Sin3p (transcriptional corepressor involved in histone deacetylase recruitment); has paired amphipathic helix PAH1 domain; interacts with ScOpi1p, not CaOpi1p; transposon mutation affects filamentous growth	-0.176234	-0.188371	1+
2448	orf19.6012		Ortholog(s) have cell division site, cell tip, cytosol localization	-0.191717	0.218821	3+
1830	orf19.6020		Ortholog(s) have Atg8 ligase activity and role in C-terminal protein lipidation, CVT pathway, autophagic vacuole assembly, cellular response to nitrogen starvation, mitochondrion degradation, piecemeal microautophagy of nucleus	-0.0233779	-0.211518	0+
3890	orf19.6029	ROT1	Similar to S. cerevisiae Rot1p, which is involved in cell wall 1,6-beta-glucan biosynthesis; has predicted transmembrane region; possibly an essential gene, disruptants not obtained by UAU1 method	-0.103043	0.680047	NA
828	orf19.6034	TUB2	Beta-tubulin; functional homolog of ScTub2p; overproduction causes S. cerevisiae inviability; has two introns; hyphal-induced; fluconazole-induced; slow growth, ectopic expression causes increased white-to opaque switching; GlcNAc-induced	0.91142	1.96267	4+
4183	orf19.6035		Protein of unknown function; repressed by nitric oxide	-0.0122315	-0.18848	NA
1422	orf19.604		Ortholog(s) have cytosol localization	0.18911	-0.0348925	0+
2124	orf19.6041	RPO41	Putative mitochondrial RNA polymerase; repressed in core stress response; Spider biofilm induced	-0.161728	-0.147965	4+
2125	orf19.6043		Has domain(s) with predicted UDP-N-acetylmuramate dehydrogenase activity, flavin adenine dinucleotide binding activity and role in oxidation-reduction process	-0.056624	-0.121124	0+
2126	orf19.6045		Putative phosphatidylserine decarboxylase; involved in phosphatidylethanolamine; Spider biofilm repressed	-0.107913	-0.29778	3+
3923	orf19.6055		Ortholog of C. parapsilosis CDC317 : CPAR2_800010, Candida tenuis NRRL Y-1498 : CANTEDRAFT_125085, Debaryomyces hansenii CBS767 : DEHA2D09086g and Candida dubliniensis CD36 : CD36_00460	-0.202526	-0.222634	NA
1023	orf19.6057		Ortholog(s) have 3-methyl-2-oxobutanoate hydroxymethyltransferase activity, role in pantothenate biosynthetic process and mitochondrion localization	-0.140234	0.0301414	4+
2127	orf19.6058	GLO1	Putative monomeric glyoxalase I; oxidative stress-induced via Cap1p	-0.272455	0.0563177	0+
1566	orf19.6059	TTR1	Putative glutaredoxin; described as a glutathione reductase; induced by human neutrophils and benomyl treatment; alkaline repressed; regulated by Gcn2 and Gcn4; required for virulence in mouse model; Spider biofilm induced	0.0611786	-0.0861571	1+
1917	orf19.606		Protein of unknown function; Hap43-induced; Spider biofilm induced	0.0575822	-0.204815	0+
1508	orf19.6060	GCN20	YEF3-subfamily ABC family protein, predicted not to be a transporter	-0.17575	-0.0304767	1+
3460	orf19.6061		Ortholog(s) have role in N-acylethanolamine metabolic process, N-acylphosphatidylethanolamine metabolic process and integral to mitochondrial inner membrane localization	-0.331378	-0.0711735	3+
2128	orf19.6063	UBP6	Putative ubiquitin-specific protease of the 26S proteasome; oxidative stress-induced via Cap1p	-0.242227	0.203039	1+
3249	orf19.6068	SVF1	Putative survival factor; stationary phase enriched protein; fluconazole-induced; regulated by Gcn4p; repressed in response to amino acid starvation (3-AT treatment); fungal-specific (no human or murine homolog)	0.017956	-0.185648	0+
2129	orf19.6070	ENA2	Putative sodium transporter; induced by ciclopirox olamine; alkaline induced by Rim101; repressed by high-level peroxide stress; induced in oral candidiasis clinical isolates; possibly essential gene; rat catheter and Spider biofilm induced	-0.13795	-0.0847609	0+
3973	orf19.6071		Ortholog(s) have peptide alpha-N-acetyltransferase activity, role in N-terminal peptidyl-methionine acetylation, cytoskeleton organization, mitochondrion inheritance and NatB complex localization	0.219022	0.0437138	NA
3096	orf19.6081	PHR2	Glycosidase; role in vaginal not systemic infection (low pH not neutral); low pH, high iron, fluconazole, Hap43-induced; Rim101-repressed at pH8; rat catheter biofilm induced; Bcr1-repressed in RPMI a/a biofilms	-0.054941	0.11458	3.5+
4006	orf19.6082		Ortholog(s) have unfolded protein binding activity, role in protein folding, protein localization to cell surface and integral to endoplasmic reticulum membrane, mitochondrial outer membrane localization	0.0342768	0.0157591	NA
2502	orf19.6086	LEU4	Putative 2-isopropylmalate synthase; regulated by Nrg1, Mig1, Tup1, Gcn4; induced by human whole blood or PMNs; macrophage/pseudohyphal-repressed after 16h; Spider biofilm repressed	0.0424783	0.00750306	1+
2501	orf19.6091	RIM8	Beta-arrestin-like protein; involved in pH response; required for pathogenesis, activation of Rim101 and alkaline pH-induced hyphal growth; colony morphology-related gene regulation by Ssn6p negative feedback regulation target	-0.0139422	0.0690608	3+
3092	orf19.6094	VPS53	Ortholog(s) have role in Golgi to vacuole transport, retrograde transport, endosome to Golgi and GARP complex localization	-0.0419812	0.156498	4+
3091	orf19.6096	TRP1	Phosphoribosylanthranilate isomerase; tryptophan biosynthesis; expected unifunctional, unlike trifunctional enzyme of some other fungi; complements E. coli trpC, S. cerevisiae trp1 mutant; CCT1 and TRP1 overlap; Spider biofilm repressed	1.03769	1.06439	1+
4102	orf19.612		Ortholog of S. cerevisiae : AIM32, C. glabrata CBS138 : CAGL0L01529g, C. parapsilosis CDC317 : CPAR2_702070, Candida tenuis NRRL Y-1498 : CANTEDRAFT_114174 and Debaryomyces hansenii CBS767 : DEHA2E10956g	-0.1201	0.0247264	NA
1189	orf19.6127	LPD1	Putative dihydrolipoamide dehydrogenase; soluble in hyphae; antigenic in human oral infection and murine systemic infection; macrophage-induced protein; protein present in exponential and stationary phase yeast cultures; Hap43p-repressed	-0.0337034	-0.155107	3.5+
3748	orf19.6133	PIF1	Putative DNA helicase; decreased transcription is observed upon fluphenazine treatment	0.188097	0.0275063	NA
2466	orf19.6138		Protein similar to ferric reductase Fre10p; possibly an essential gene, disruptants not obtained by UAU1 method	0.550591	0.477854	0+
3035	orf19.6143		Predicted long-chain-alcohol oxidase; Spider biofilm induced	-0.164473	-0.247736	2+
2465	orf19.6152		Ortholog of C. parapsilosis CDC317 : CPAR2_205930, Candida tenuis NRRL Y-1498 : CANTEDRAFT_115846, Debaryomyces hansenii CBS767 : DEHA2E06072g and Candida dubliniensis CD36 : CD36_32830	-0.0223783	-0.208334	0+
1533	orf19.6155		Ortholog(s) have DNA ligase (ATP) activity	0.0555979	0.791621	3+
1965	orf19.6165	KGD1	Putative 2-oxoglutarate dehydrogenase; regulated by Efg1 under yeast but not hyphal growth conditions; transcript induced in an RHE model of oral candidiasis; stationary phase enriched protein; Hap43-repressed; rat catheter biofilm induced	-0.060219	0.0286726	3.5+
1966	orf19.6166		Has domain(s) with predicted hydrolase activity, acting on ester bonds activity and role in lipid catabolic process	0.105373	0.0799798	2+
1967	orf19.6167	AYR1	Putative oxidoreductase; transcriptionally induced by interaction with macrophage	-0.0289229	0.000322606	0+
4268	orf19.6168		Ortholog of Debaryomyces hansenii CBS767 : DEHA2F17930g, Candida dubliniensis CD36 : CD36_80830, Candida tropicalis MYA-3404 : CTRG_04030 and Candida lusitaniae ATCC 42720 : CLUG_04224	-0.0861764	-0.0416532	NA
3426	orf19.6169	ATO1	Putative fungal-specific transmembrane protein; induced by Rgt1; Spider biofilm induced	-0.0886909	-0.0676998	3+
1979	orf19.6178	FBP1	Fructose-1,6-bisphosphatase; key gluconeogenesis enzyme; regulated by Efg1, Ssn6; induced by phagocytosis; effects switch from glycolysis to gluconeogenesis in macrophage; rat flow model biofilm induced; overlaps orf19.6179	-0.0802717	-0.0262127	0+
1981	orf19.6185		Putative pseudouridine-5'-phosphate glycosidase; overlaps orf19.6186 and orf19.6187; Spider biofilm repressed	-0.0396638	-0.0794026	0+
1540	orf19.6193	TAF145	Protein similar to S. cerevisiae Taf145p, a component of RNA polymerase II transcription factor TFIID; flucytosine repressed; likely to be essential for growth, based on an insertional mutagenesis strategy	0.145088	0.0967599	4+
2458	orf19.6195		Ortholog(s) have 3'-5'-exoribonuclease activity	-0.0731413	0.044905	0+
3851	orf19.6200		Pry family pathogenesis-related protein; oral infection upregulated gene; mutant has reduced capacity to damage oral epithelial cells	0.0689558	0.148909	NA
1976	orf19.6202	RBT4	Pry family protein; required for virulence in mouse systemic/rabbit corneal infections; not filamentation; mRNA binds She3, is localized to hyphal tips; Hap43-induced; in both yeast and hyphal culture supernatants; Spider biofilm induced	0.0770206	-0.0014107	4+
2939	orf19.6214	ATC1	Cell wall acid trehalase; catalyzes hydrolysis of the disaccharide trehalose; similar to S. cerevisiae vacuolar acid trehalase (Ath1p); Hap43p-repressed gene	0.0438109	0.209793	0+
2331	orf19.6224		RTA domain protein; predicted role in response to stress; Spider biofilm induced	0.00375934	-0.0614761	0+
1577	orf19.6225	PCL7	Putative cyclin-like protein; possible Pho85 cyclin; hyphal repressed; induced by Mnl1 under weak acid stress	0.244268	0.00270478	3.5+
1946	orf19.6230		Ortholog(s) have enzyme regulator activity, m7G(5')pppN diphosphatase activity	0.326333	0.531902	3+
1945	orf19.6237	RAC1	G-protein of RAC subfamily; required for embedded filamentous growth, not for serum-induced hyphal growth; dynamic localization at plasma membrane and nucleus; similar to, but not interchangeable with, Cdc42p; lacks S. cerevisiae homolog	0.0520046	-0.0368292	0
2480	orf19.6263		Predicted MFS membrane transporter; member of the monocarboxylate porter (MCP) family; Spider biofilm induced	-0.148982	-0.0925928	2+
2482	orf19.6271		Ortholog(s) have role in mRNA splicing, via spliceosome and nucleus, transcriptionally active chromatin localization	-0.0609378	-0.0286127	1+
1984	orf19.6287	AAT21	Putative aspartate aminotransferase; stationary phase enriched protein; Gcn4-regulated; Spider biofilm induced	-0.164761	-0.012983	0+
2459	orf19.6297		Ortholog(s) have pseudouridine synthase activity, role in tRNA pseudouridine synthesis and cytosol, nucleus localization	0.518784	0.402626	0+
1987	orf19.6305		Hydroxytrimethyllysine aldolase, the second enzyme in the carnitine biosynthesis pathway	-0.0681006	-0.0927945	0+
1988	orf19.6306		Trimethylaminobutyraldehyde dehydrogenase, the third enzyme of the carnitine biosynthesis pathway	0.00550998	-0.107262	0
1989	orf19.6316		Predicted membrane transporter, member of the L-amino acid transporter-3 (LAT3) family, major facilitator superfamily (MFS)	-0.0210928	-0.0965243	0+
3022	orf19.6322	ARD	D-arabitol dehydrogenase, NAD-dependent (ArDH); enzyme of D-arabitol and D-arabinose catabolism; D-arabitol is a marker for active infection in humans; rat catheter and Spider biofilm induced	-0.865835	0.242221	0+
3827	orf19.6323	HPA2	Ortholog(s) have D-amino-acid N-acetyltransferase activity, role in D-amino acid metabolic process and cytosol, nucleus localization	0.0342685	0.0507861	NA
1991	orf19.6324	VID27	Protein similar to S. cerevisiae Vid27p; transposon mutation affects filamentous growth; mutation confers hypersensitivity to toxic ergosterol analog; fungal-specific (no human or murine homolog)	0.0422628	-0.128102	3+
1441	orf19.6327	HET1	Putative sphingolipid transfer protein; involved in localization of glucosylceramide which is important for virulence; Spider biofilm repressed	-0.0030595	0.039843	1+
3428	orf19.6328		Putative protein of the mitochondrial intermembrane space; predicted role in acetate utilization and gluconeogenesis; Spider biofilm repressed	0.0980759	-0.0565798	0+
1412	orf19.633		Putative methyltransferase; decreased expression in hyphae compared to yeast; expression regulated during planktonic growth; flow model biofilm induced; Hap43-repressed gene	0.111372	0.104626	0+
2472	orf19.6344	RBK1	Ortholog(s) have cytosol, nucleus localization	0.00709435	0.00738802	0+
3432	orf19.6348		Predicted cysteine proteinase domain; mutants are viable	0.0909073	-0.0258876	4+
1281	orf19.635		Protein of unknown function; induced by alpha pheromone in SpiderM medium	0.232082	0.278566	0+
2022	orf19.6358		Ortholog(s) have protein homodimerization activity, ubiquitin-protein ligase activity and role in cellular response to ionizing radiation, free ubiquitin chain polymerization, postreplication repair, protein K63-linked ubiquitination	-0.162283	-0.402708	3.5+
2027	orf19.6382		Putative MRP/CFTR-subfamily ABC transporter; member of multidrug resistance-associated protein (MRP) subfamily of ABC family; similar to S. cerevisiae Bpt1p	0.0516324	-0.177496	0+
2028	orf19.6385	ACO1	Aconitase; induced in high iron; 2 upstream CCAAT motifs; amino acid starvation (3-AT), amphotericin B, phagocytosis, farnesol induced; Hap43, fluconazole-repressed; Gcn4-regulated; antigenic in infection; Spider biofilm repressed	-0.150159	-0.298182	4+
4084	orf19.639		S. cerevisiae ortholog YDR370C/DXO1 has decapping and 5&#8242;-3&#8242; exoRNase activity; decreased transcription is observed upon fluphenazine treatment or in an azole-resistant strain that overexpresses CDR1 and CDR2	0.00686739	0.020208	NA
2153	orf19.6398		S. pombe ortholog SPBC460.04c is a predicted sulfonate/alpha-ketoglutare dioxygenase; induced by nitric oxide; Spider biofilm induced	-0.0518887	0.00632681	3+
2598	orf19.6407		Ortholog(s) have role in ribosomal large subunit biogenesis and cytoplasm, cytosolic large ribosomal subunit, preribosome, large subunit precursor localization	0.109268	-0.134395	1+
3400	orf19.641		Ortholog(s) have role in protein folding and endoplasmic reticulum localization	-0.0667233	-0.131031	0+
2380	orf19.642		Ortholog of C. parapsilosis CDC317 : CPAR2_203380, Candida tenuis NRRL Y-1498 : CANTEDRAFT_117493, Debaryomyces hansenii CBS767 : DEHA2G19228g and Candida dubliniensis CD36 : CD36_30470	-0.179404	-0.0745507	2+
2152	orf19.6425		Ortholog(s) have role in nuclear-transcribed mRNA catabolic process, 3'-5' exonucleolytic nonsense-mediated decay, nuclear-transcribed mRNA catabolic process, non-stop decay and Ski complex, cytosol localization	-0.0784896	-0.0736596	1+
1710	orf19.644	HGT9	Putative glucose transporter of the major facilitator superfamily; the C. albicans glucose transporter family comprises 20 members; 12 probable membrane-spanning segments; induced at low (0.2%, compared to 2%) glucose in rich media; intron	0.283718	0.306282	2+
4105	orf19.644	HGT9	Putative glucose transporter of the major facilitator superfamily; the C. albicans glucose transporter family comprises 20 members; 12 probable membrane-spanning segments; induced at low (0.2%, compared to 2%) glucose in rich media; intron	-0.220484	0.113273	NA
2597	orf19.6444		Ortholog(s) have role in cellular response to amino acid starvation, meiosis, regulation of TOR signaling cascade and Seh1-associated complex, cytosol, extrinsic to fungal-type vacuolar membrane localization	0.00235475	-0.0131882	0+
1469	orf19.6449		Ortholog of Candida dubliniensis CD36 : CD36_34310	-0.0065562	-0.0400253	3+
2479	orf19.6459	DPP3	Protein similar to S. cerevisiae pyrophosphate phosphatase Dpp1; required for farnesol biosynthesis; repressed by 17-beta-estradiol, ethynyl estradiol; Spider biofilm induced	-0.2804	-0.0770516	0+
2049	orf19.6460	PEX1	Ortholog(s) have ATPase activity, protein heterodimerization activity, role in protein import into peroxisome matrix, receptor recycling and cytosol, peroxisomal membrane localization	-0.0568217	-0.021105	0
1377	orf19.6464		Protein of unknown function; induced upon adherence to polystyrene; oxidative stress-induced via Cap1	-0.0086538	-0.159254	0+
3403	orf19.6477		Ortholog(s) have tRNA (guanine-N7-)-methyltransferase activity, role in tRNA methylation and cytosol, nucleus, tRNA methyltransferase complex localization	-0.0168387	0.0494907	0+
1152	orf19.6498		Ortholog(s) have role in cellular protein complex localization, nucleocytoplasmic transport and DNA-directed RNA polymerase II, holoenzyme, cytoplasm localization	1.37169	0.841686	0+
1151	orf19.6502		Short-chain dehydrogenase/reductase; upregulation correlates with clinical development of fluconazole resistance	0.608821	0.422853	1+
4331	orf19.6508		Ortholog(s) have protein transporter activity, role in Golgi to plasma membrane transport, intracellular protein transport and vesicle coat localization	-0.18129	0.26139	NA
2868	orf19.651	LYP1	Putative permease; amphotericin B induced; flucytosine repressed; possibly an essential gene, disruptants not obtained by UAU1 method	0.0672074	-0.0112166	0+
50	orf19.6511	LIG1	tRNA ligase; functional homolog of S. cerevisiae Trl1	0.213321	0.383634	3.5+
1203	orf19.6515	HSP90	Essential chaperone, regulates several signal transduction pathways and temperature-induced morphogenesis; activated by heat shock, stress; localizes to surface of hyphae, not yeast cells; mediates echinocandin and biofilm azole resistance	0.161298	0.0609013	4+	Y
3780	orf19.652		Ortholog(s) have crossover junction endodeoxyribonuclease activity, role in DNA repair and cytoplasm, nucleus localization	-0.16808	0.061689	NA
3252	orf19.6522		Putative allantoate permease; Gcn4-regulated; Spider biofilm induced	-0.0841054	0.00503878	0+
1463	orf19.6531	NUC2	Putative NADH-ubiquinone oxidoreductase; identified in detergent-resistant membrane fraction (possible lipid raft component); alkaline repressed; Hap43-repressed; Spider biofilm repressed	-0.103961	0.0210259	3.5+
2131	orf19.6533	MSK1	Putative mitochondrial lysine-tRNA synthetase; flucytosine repressed	0.0115316	-0.0192441	2+
209	orf19.6537		Ortholog(s) have role in chromosome segregation and nuclear MIS12/MIND type complex, spindle pole localization	-0.183851	0.649381	4+
3766	orf19.6538	VMA11	Predicted ortholog of S. cerevisiae Tfp3/Vma11; c' subunit of the V0 subcomplex of the vacuolar ATPase; required for hemoglobin-iron utilization; Spider biofilm repressed	0.206295	0.148834	NA
2453	orf19.6551		Ortholog(s) have SNAP receptor activity, role in Golgi vesicle transport, vesicle fusion and Golgi medial cisterna, SNARE complex localization	0.108036	0.0773518	2+
2122	orf19.6558		Has domain(s) with predicted zinc ion binding activity, role in ER to Golgi vesicle-mediated transport, intracellular protein transport and COPII vesicle coat localization	0.175661	-0.166276	0+
2350	orf19.656	DPP1	Putative diacylglycerol pyrophosphate phosphatase of diacylglycerol production for phospholipid biosynthesis; downregulation correlates with clinical development of fluconazole resistance	-0.0575694	-0.0151775	0+
2123	orf19.6561	LAT1	Putative dihydrolipoamide acetyltransferase component (E2) of pyruvate dehydrogenase complex; sumoylation target; Spider biofilm repressed	-0.0184247	-0.0434179	4+
1312	orf19.6562	RNH35	Putative ribonuclease H2 catalytic subunit; flucytosine induced; Spider biofilm repressed	-0.112579	0.0421834	0+
1461	orf19.6569		Predicted transmembrane transporter; induced during chlamydospore formation in both C. albicans and C. dubliniensis	0.0439641	-0.000661511	0+
1462	orf19.6570	NUP	Nucleoside permease; adenosine and guanosine are substrates, whereas cytidine, adenine, guanine, uridine, uracil are not; similar to a nucleoside permease of S. pombe; possibly processed by Kex2p	-0.000386498	-0.0609425	0+
1517	orf19.6577	FLU1	Multidrug efflux pump of the plasma membrane; MDR family member of the MFS (major facilitator superfamily) of transporters; involved in histatin 5 efflux; fungal-specific (no human/murine homolog)	-0.339974	-0.145114	0
1334	orf19.6578		Predicted membrane transporter; vesicular neurotransmitter (VNT) family, major facilitator superfamily (MFS); repressed in core caspofungin response; induced in oralpharyngeal candidasis; Spider biofilm induced	-0.099949	-0.13603	0+
3440	orf19.658	GIN1	Protein involved in regulation of DNA-damage-induced filamentous growth; putative component of DNA replication checkpoint; ortholog of S. cerevisiae Mrc1p, an S-phase checkpoint protein; Hap43p-induced gene	-0.0286829	0.507983	3.5+
2497	orf19.6592		Predicted membrane transporter, member of the aromatic acid:proton symporter (AAHS) family, major facilitator superfamily (MFS)	-0.180705	-0.223147	2+
3088	orf19.6595	RTA4	Protein similar to S. cerevisiae Rsb1p, involved in fatty acid transport; transposon mutation affects filamentous growth; alkaline downregulated; caspofungin induced; possibly an essential gene; Hap43p-repressed	0.531445	-0.103461	1+
2498	orf19.6596		Putative esterase; possibly transcriptionally regulated by Tac1; induced by Mnl1 under weak acid stress; protein present in exponential and stationary growth phase yeast cultures; Spider biofilm repressed	0.00268901	0.228256	0+
2499	orf19.6602		Ortholog(s) have role in aerobic respiration, ubiquinone biosynthetic process and mitochondrial inner membrane localization	0.64488	0.0836392	2+
2500	orf19.6606		Ortholog of C. parapsilosis CDC317 : CPAR2_201040, Candida tenuis NRRL Y-1498 : CANTEDRAFT_112677, Debaryomyces hansenii CBS767 : DEHA2E02420g and Pichia stipitis Pignal : PICST_37559	-0.174585	-0.0271198	1+
2522	orf19.6643	MCT1	Putative malonyl-CoA acyl carrier protein acyltransferase	0.0139856	0.149366	0+
2523	orf19.6653		Ortholog(s) have ribosome binding activity, role in cytoplasmic translation and extrinsic to membrane, mitochondrial inner membrane localization	-0.26478	0.00182723	2+
2542	orf19.6659	GAP6	Broad-specificity amino acid permease; Plc1, Gcn4 regulated; rat catheter biofilm induced	-0.216198	0.0904941	1+
1288	orf19.666		Essential protein required for the DNA integrity checkpoint pathway; Spider biofilm induced	0.0684934	0.331723	0+
3843	orf19.6660		Protein of unknown function; mRNA binds to She3; Hap43-repressed; rat catheter and flow model biofilm induced	0.752692	0.444276	NA
2524	orf19.668		Putative fork-head transcription factor; Spider biofilm repressed	0.260096	-0.00179023	2+
2543	orf19.6680	FGR27	Zn(II)2Cys6 transcription factor; transposon mutation affects filamentous growth; required for yeast cell adherence to silicone substrate; Spider biofilm induced	0.362237	0.610942	0+	Y
4076	orf19.6681		Protein of unknown function; Spider biofilm induced	0.220054	0.361456	NA
2544	orf19.6685	ISY1	Putative pre-mRNA-splicing factor; mutation confers resistance to 5-fluorocytosine (5-FC); rat catheter biofilm induced	-0.182092	-0.0954877	0+
2525	orf19.669	PRM1	Putative membrane protein with a predicted role in membrane fusion during mating; Hap43p-repressed gene; protein induced during the mating process	-0.117605	-0.166344	0+
2546	orf19.6699		Ortholog(s) have histidinol-phosphatase activity, role in histidine biosynthetic process and cytosol, nucleus localization	0.053553	-0.0389036	4+
3442	orf19.6705		Putative guanyl nucleotide exchange factor with Sec7 domain; required for normal filamentous growth; regulated by yeast-hyphal switch; filament induced; regulated by Nrg1, Tup1, Mob2, Hap43; mRNA binds She3; Spider biofilm induced	-0.104399	0.0442599	0+
4066	orf19.6707		Predicted vacuolar protein with a calcineurin-like phosphoesterase domain; repressed by alpha pheromone in SpiderM medium	-0.166809	-0.0567378	NA
3781	orf19.671	PSP1	Protein repressed during the mating process	0.676361	0.807199	NA
3891	orf19.6717		Putative serine hydrolase; Spider biofilm repressed	-0.160645	-0.240231	NA
2549	orf19.6719		Putative nucleosome assembly protein; homozygous transposon insertion causes decreased colony wrinkling under filamentous growth-inducing conditions, but does not block true hyphal formation in liquid media	0.434242	0.413873	0+
2550	orf19.6727	RIT1	Putative initiator tRNA methionine ribosyltransferase; fungal-specific (no human or murine homolog)	-0.0588961	0.00965427	0+
3141	orf19.673		Has domain(s) with predicted FMN binding, oxidoreductase activity and role in oxidation-reduction process	-0.056877	-0.0871485	0+
1086	orf19.6730		Ortholog(s) have nucleolus localization	0.0556769	0.0519247	2+
3908	orf19.6736		Protein required for mitochondrial ribosome small subunit biogenesis; role in maturation of SSU-rRNA; Spider biofilm induced	0.148062	-0.170658	NA
3759	orf19.6738	VAN1	Member of Mnn9 family of mannosyltransferases; ortholog of S. cerevisiae Van1p; fungal-specific (no human or murine homolog)	1.131	1.71233	NA
3480	orf19.6744		Ortholog(s) have role in regulation of mitotic metaphase/anaphase transition and cytosol, nucleus localization	-0.101908	0.0123684	3+
3346	orf19.6747		Ortholog(s) have acid phosphatase activity, role in dephosphorylation, intracellular sterol transport and cytoplasm, nucleus localization	0.0301448	0.106607	0+
4184	orf19.6756		Ortholog(s) have Rab GTPase binding activity and Golgi apparatus, endoplasmic reticulum localization	0.178791	0.00815683	NA
2646	orf19.6766		Ortholog of S. cerevisiae Nop13; a nucleolar protein found in preribosomal complexes; Hap43-induced gene; rat catheter biofilm induced	-0.0876833	-0.111691	3+
3341	orf19.6773	EMC29	Putative scaffold protein; assists in association of the proteasome core particle with the regulatory particle; ortholog of S. cerevisiae Ecm29; transposon mutation affects filamentous growth; flow model biofilm repressed	-0.03574	-0.0713276	0+
1491	orf19.6794	FESUR1	Putative ubiquinone reductase; transcriptionally induced by interaction with macrophage; alkaline downregulated; repressed by nitric oxide; clade-associated gene expression; Hap43p-repressed gene	0.0554783	-0.0796741	3+
1185	orf19.6801	RPD31	Putative histone deacetylase; involved in regulation of white-opaque switch; Spider biofilm repressed	0.0528043	0.163466	0+
1561	orf19.6804		Ortholog(s) have signal sequence binding activity, role in protein targeting to ER and cytosol, signal recognition particle, endoplasmic reticulum targeting localization	-0.0939114	0.410221	0
3337	orf19.6809		Putative phosphomutase-like protein; protein present in exponential and stationary growth phase yeast; Hap43-repressed; Spider biofilm repressed	-0.0591338	-0.0104181	0+
2738	orf19.681	HAP43	CCAAT-binding factor-dependent transcription factor; repressor; also called CAP2; required for low iron response; similar to bZIP transcription factor AP-1; repressed by Sfu1; ciclopirox olamine induced; rat catheter, Spider biofilm induced	0.236267	-0.116033	3+
1489	orf19.6830		Putative enoyl-CoA hydratase; Spider biofilm induced	0.896844	0.54457	0+
2277	orf19.6832		Protein of unknown function; regulated by Sef1p-, Sfu1p-, and Hap43p	-0.0326524	-0.235031	3+
2568	orf19.6844	ICL1	Isocitrate lyase; glyoxylate cycle enzyme; required for virulence in mice; induced upon phagocytosis by macrophage; farnesol regulated; Pex5-dependent peroxisomal localization; stationary phase enriched; rat catheter, Spider biofilm induced	-0.219465	-0.0614435	1+
2569	orf19.6847		Putative tRNA U44 2'-O-methyltransferase; virulence-group-correlated expression; induced during oral infection; mutants have reduced ability to damage oral epithelial cells; early-stage flow model biofilm induced	-0.0746106	0.175194	0+
2570	orf19.6848	VPS16	Protein similar to S. cerevisiae Vps16p, which is involved in protein-vacuolar targeting; likely to be essential for growth, based on insertional mutagenesis; downregulated in biofilm or in azole-resistant strain that overexpresses MDR1	2.00683	1.93893	4+
1812	orf19.685	YHM1	Putative mitochondrial carrier protein; fungal-specific (no human or murine homolog); Hap43p-repressed gene	0.522435	0.742374	2+
4007	orf19.6851	CHL4	Protein described as having role in chromosome segregation; RNA abundance regulated by tyrosol and cell density	0.0181558	0.0174532	NA
3446	orf19.6858	EDC3	Ortholog(s) have role in cytoplasmic mRNA processing body assembly, deadenylation-independent decapping of nuclear-transcribed mRNA and cytoplasmic mRNA processing body localization	0.134082	-0.0741266	1+
2057	orf19.6863	VPH1	Vacuolar H(+)-ATPase; transcription regulated by Nrg1, Mig1, and Tup1	0.0982799	0.217661	0+
2574	orf19.6868		Putative NADPH-dependent methylglyoxal reductase; homozygous transposon insertion causes decreased colony wrinkling under filamentous growth-inducing conditions, but does not block true hyphal formation in liquid media	0.00618248	-0.127527	0+
4013	orf19.6869		Putative lipid raft associated protein; Spider biofilm induced	-0.0738303	-0.0691503	NA
2071	orf19.6875	VPS35	Putative role in vacuolar sorting; downregulated in biofilm; induced upon adherence to polystyrene	0.683323	0.405833	0
3507	orf19.6877	PNG2	Putative peptide:N-glycanase; gene has variable numbers of 12-bp repeats; induced by caspofungin, ciclopirox olamine, ketoconazole or hypoxia; gene of core caspofungin response; Hap43-induced; Spider biofilm induced	-0.0323025	0.00305689	0+
2072	orf19.6882	OSM1	Putative flavoprotein subunit of fumarate reductase; soluble protein in hyphae; caspofungin repressed; stationary phase enriched protein; flow model biofilm induced; Spider biofilm repressed	0.0709172	-0.0391688	0+
4029	orf19.6885	SPO7	Putative regulatory subunit of Nem1-Spo7 phosphatase holoenzyme that regulates nuclear growth by controling phospholipid biosynthesis; induced by alpha pheromone in SpiderM medium	-0.0993253	0.0131904	NA
2575	orf19.6886		Ortholog(s) have rRNA binding activity, role in maturation of LSU-rRNA from tricistronic rRNA transcript (SSU-rRNA, 5.8S rRNA, LSU-rRNA), ribosomal large subunit export from nucleus and nucleolus localization	0.0748964	0.501644	4+
2074	orf19.6889	MKK2	Ortholog of S. cerevisiae Mkk2; MAP kinase kinase involved in signal transduction; macrophage-downregulated; mutants are viable and hypersensitive to caspofungin	-0.170647	-0.123788	0+
1811	orf19.689	PLB1	Phospholipase B; host cell penetration and virulence in mouse systemic infection; Hog1-induced; signal sequence, N-glycosylation, and Tyr phosphorylation site; induced in fluconazole-resistant strains; rat catheter biofilm repressed	-0.159759	-0.178162	0+
1452	orf19.6898		Protein similar to S. pombe SPBC1709.16c a predicted aromatic ring-opening dioxygenase; induced by benomyl treatment or in azole-resistant strain that overexpresses MDR1; Spider biofilm induced	0.118183	-0.11338	0+
2576	orf19.6899		Putative oxidoreductase; mutation confers hypersensitivity to toxic ergosterol analog; rat catheter and Spider biofilm induced	-0.0735388	-0.0300005	0+
1650	orf19.690	PLB2	Putative phospholipase B; conserved catalytic region; 6 putative N-glycosylation motifs; predicted secretion signal; no GPI anchor predicted; fungal-specific (no human or murine homolog)	-0.0526752	-0.113767	0+
2577	orf19.6900		Ortholog(s) have role in mitochondrial genome maintenance, mitochondrion inheritance, phospholipid transport, protein import into mitochondrial outer membrane and ERMES complex, cytosol, nucleus localization	0.0614122	-0.0951491	3.5+
1251	orf19.6901		Ortholog(s) have enzyme activator activity, m7G(5')pppN diphosphatase activity	-0.0833083	0.150408	0+
2076	orf19.6904	GCN3	Putative translation initiator; downregulated in the presence of human whole blood or polymorphonuclear (PMN) cells	-0.0986061	0.0164915	0
2077	orf19.6905		Ortholog of S. cerevisiae : YNL011C, C. glabrata CBS138 : CAGL0H03619g, C. parapsilosis CDC317 : CPAR2_300420 and Candida tenuis NRRL Y-1498 : CANTEDRAFT_111980	0.0771621	-0.00679741	0+
1649	orf19.691	GPD2	Surface protein similar to glycerol 3-P dehydrogenase; binds host Factor H, FHL-1, plasminogen; regulated by Ssn6, Nrg1, Efg1; induced by cell wall regeneration, macrophage/pseudohyphal growth, core stress response; Spider biofilm induced	0.0289342	-0.0410201	0+
1453	orf19.6912		Putative ethanolamine kinase	0.210848	0.0928627	0+
761	orf19.6913	GCN2	Translation initiation factor 2-alpha (eIF2alpha) kinase; has nonessential role in amino acid starvation response, in contrast to S. cerevisiae homolog; similar to S. cerevisiae Gcn2p	0.0115766	0.0429603	0+
2079	orf19.6915	MRE11	Putative DNA double-strand break repair factor; involved in response to oxidative stress and drug resistance	0.0350075	-0.148469	0
2578	orf19.6916		Ortholog(s) have unfolded protein binding activity, role in mitochondrial proton-transporting ATP synthase complex assembly and mitochondrion localization	0.277645	-0.0494205	1+
2586	orf19.6928	SAP9	Secreted aspartyl protease; roles in adhesion, cell surface integrity; induced by antifungal drugs, stationary phase, or in white-phase cells; farnesol-downregulated in biofilm; autocatalytic processing; GPI-anchor; Spider biofilm induced	-0.165923	0.0469517	1+
2094	orf19.6933		Ortholog(s) have peptidyl-prolyl cis-trans isomerase activity, protein phosphatase type 2A regulator activity and role in mitotic spindle organization in nucleus, response to osmotic stress	-0.0889406	-0.02957	0
4176	orf19.6952		Ortholog(s) have DNA binding, chromatin binding, histone deacetylase activity	0.477942	0.247241	NA
3227	orf19.6956	DAL9	Putative allantoate permease; fungal-specific (no human or murine homolog)	0.0846309	-0.191412	0+
3782	orf19.696	STE2	Receptor for alpha factor mating pheromone, MFalpha; required for a-type cells to respond to alpha factor, for opaque a-form mating and white a-form response; possible Kex2p substrate; a-specific, alpha-factor induced, A1p-Alpha2p repressed	0.0291594	0.0725853	NA
2398	orf19.698		Integral ER membrane protein; predicted role in maintenance of ER zinc homeostasis; Spider biofilm induced	0.153293	-0.0829443	2+
2141	orf19.6981		Ortholog of S. cerevisiae : YKR051W, C. glabrata CBS138 : CAGL0K08228g, C. parapsilosis CDC317 : CPAR2_405720 and Candida tenuis NRRL Y-1498 : CANTEDRAFT_124861	-0.0575464	-0.0800238	0+
2592	orf19.6984		Ortholog of C. parapsilosis CDC317 : CPAR2_405760, Candida tenuis NRRL Y-1498 : CANTEDRAFT_116052, Debaryomyces hansenii CBS767 : DEHA2D16940g and Candida dubliniensis CD36 : CD36_85460	-0.0476086	0.168966	0+
2593	orf19.6986		Has domain(s) with predicted Rab GTPase activator activity, role in regulation of Rab GTPase activity and intracellular localization	0.159043	0.274712	0+
1543	orf19.6988	OST1	Alpha subunit of the oligosaccharyltransferase complex of the ER lumen; catalyzes asparagine-linked glycosylation of newly synthesized proteins; Spider biofilm repressed	0.0953617	0.591076	3+
2143	orf19.6990		Putative peptidyl-prolyl cis-trans isomerase; predicted endoplasmic reticulum (ER) localization	0.102016	0.0192937	0+
2594	orf19.6992		Predicted MFS membrane transporter, member of the drug:proton antiporter (12 spanner) (DHA1) family; Spider biofilm induced	-0.145551	-0.0600328	0+
2144	orf19.6993	GAP2	General amino acid permease; ketoconazole, flucytosine repressed; Ssy1-dependent histidine induction; regulated by Nrg1, Tup1; colony morphology-related gene regulation by Ssn6; Spider and flow model biofilm induced	-0.139638	-0.022431	0+
1246	orf19.6994	BAT22	Putative branched chain amino acid aminotransferase; regulated by Gcn4p; induced by farnesol treatment, GlcNAc, amino acid starvation (3-aminotriazole treatment); present in exponential and stationary growth phase yeast cultures	0.0268886	-0.123547	0+
3464	orf19.6995	ATO6	Putative fungal-specific transmembrane protein	0.0638448	0.0252334	0+
2595	orf19.7002		Ortholog of C. parapsilosis CDC317 : CPAR2_806990, Candida tenuis NRRL Y-1498 : CANTEDRAFT_122709, Debaryomyces hansenii CBS767 : DEHA2E00110g and Candida dubliniensis CD36 : CD36_85625	-0.0049884	-0.566274	0+
2374	orf19.701	CFL11	Protein similar to ferric reductase Fre10p; flucytosine repressed; possibly adherence-induced; possibly an essential gene, disruptants not obtained by UAU1 method	0.0279193	-0.00876371	0+
2605	orf19.7010		Ortholog(s) have cytosol, ubiquitin ligase complex localization	-0.0887992	-0.012937	1+
135	orf19.7011		Ortholog(s) have 90S preribosome, nucleus, spindle pole body localization	0.261184	0.082769	4+
2162	orf19.7016	PHM5	Ortholog(s) have endopolyphosphatase activity, exopolyphosphatase activity, role in polyphosphate catabolic process and fungal-type vacuole membrane, nucleus localization	0.110844	-0.0806925	0+
3909	orf19.7017	YOX1	Putative homeodomain-containing transcription factor; transcriptional repressor; periodic mRNA expression, peak at cell-cycle G1/S phase	0.603336	0.0121338	NA
4190	orf19.703		Ortholog(s) have 2',3'-cyclic-nucleotide 3'-phosphodiesterase activity, role in cyclic nucleotide metabolic process and clathrin-coated vesicle localization	-0.0299805	-0.0138933	NA
3470	orf19.7033		Putative dual specificity protein phosphatase, similar to S. cerevisiae Pps1p	-0.0834586	0.0919743	2+
105	orf19.7037	YAE1	Ortholog(s) have cytoplasm, nucleus localization	#N/A	#N/A	2+
3925	orf19.7038		Ortholog(s) have phosphatidylinositol-3-phosphate binding activity, role in protein targeting to vacuole and cytoplasm, nucleus localization	0.108401	0.349984	NA
2627	orf19.7056		Putative protein of unknown function; transcript is upregulated in clinical isolates from HIV+ patients with oral candidiasis; regulated by Sef1, Sfu1, and Hap43	-0.173455	-0.340169	0+
1483	orf19.7061		Ortholog(s) have ATPase activity and cytosol, nucleus localization	-0.0926917	-0.083411	0+
1051	orf19.7069		Putative AdoMet-dependent proline methyltransferase; Hap43-induced; required for normal flow model biofilm growth; Spider biofilm repressed	0.063415	0.00197914	0+
1482	orf19.7071	FGR2	Protein similar to phosphate transporters; transposon mutation affects filamentous growth; expression is regulated upon white-opaque switching	-0.017988	0.043355	2+
4127	orf19.7073		Ortholog of S. cerevisiae : YCL002C, C. glabrata CBS138 : CAGL0B04719g, C. parapsilosis CDC317 : CPAR2_805360, Candida dubliniensis CD36 : CD36_70180 and Pichia stipitis Pignal : PICST_64481	0.0572247	-0.123117	NA
1067	orf19.7074		Ortholog(s) have RNA polymerase II transcription factor recruiting transcription factor activity, methylated histone residue binding activity	0.02948	-0.105771	0+
2626	orf19.7077		Putative ferric reductase; induced by Mac1 under copper starvation; Plc1-regulated; Rim101-repressed	0.00221303	0.528968	0+
1068	orf19.7083	DCC1	Protein with a predicted role in sister chromatid cohesion and telomere length maintenance; cell-cycle regulated periodic mRNA expression	-0.102202	-0.0400245	0+
2625	orf19.7088		Ortholog(s) have single-stranded telomeric DNA binding activity, role in regulation of translational fidelity, telomere maintenance, threonylcarbamoyladenosine metabolic process and cytosol, nucleus localization	-0.0909877	0.0236155	2+
1481	orf19.7091		Protein of unknown function; induced by nitric oxide; Spider biofilm repressed	0.0490681	-0.128644	0+
2624	orf19.7092		Putative NAD dependent epimerase/dehydratase family protein; Spider biofilm repressed	-0.135873	-0.143984	1+
2623	orf19.7095		Ortholog(s) have endoplasmic reticulum localization	-0.288326	-0.106306	1+
4008	orf19.7096		Ortholog(s) have fungal-type vacuole membrane, mitochondrion localization	8.60524e-05	0.0330982	NA
4354	orf19.7105	FAR1	Protein involved in regulation of pheromone-mediated mating; repressed by A1p and Alpha2p in white-phase cells; null mutant shows no pheromone response in opaque cells; overexpression causes enhanced pheromone response and cell cycle arrest	0.0389383	-0.075022	NA
1267	orf19.7107		Ortholog(s) have role in ribosomal large subunit biogenesis and cytoplasm, nucleus, ribosome localization	-0.0774652	-0.0787933	3+
3312	orf19.7111		Putative mitochondrial outer membrane protein membrane fission effector; possibly an essential gene, disruptants not obtained by UAU1 method	0.179948	-0.0238976	0+
2621	orf19.7112	FRP2	Putative ferric reductase; alkaline induced by Rim101; fluconazole-downregulated; upregulated in the presence of human neutrophils; possibly adherence-induced; regulated by Sef1, Sfu1, and Hap43	0.00488128	-0.266061	2+
1311	orf19.7115	SAC7	Putative GTPase activating protein (GAP) for Rho1; repressed upon adherence to polystyrene; macrophage/pseudohyphal-repressed; transcript is upregulated in RHE model of oral candidiasis and in clinical oral candidiasis	-0.341026	0.105242	0+
1083	orf19.7124	RVS161	Protein required for endocytosis; contains a BAR domain, which is found in proteins involved in membrane curvature; null mutant exhibits defects in hyphal growth, virulence, cell wall integrity, and actin patch localization	0.117812	0.016735	1+
3471	orf19.7128	SYS1	Putative Golgi integral membrane protein; transcript regulated by Mig1	-0.0419592	0.073552	0+
4063	orf19.713		Ortholog(s) have role in apoptotic process and cytoplasm, nucleus localization	0.0344235	-0.0919359	NA
1472	orf19.7140		Putative catechol o-methyltransferase; stationary phase enriched protein; transcription upregulated in clinical isolates from HIV+ patients with oral candidiasis; Spider biofilm repressed	0.301557	-0.0461911	0
2178	orf19.7152		Protein similar to Aspergillus CYSK O-acetylserine sulfhydrylase, suggesting that C. albicans uses an O-acetyl-serine (OAS) pathway of sulfur assimilation; upregulated in biofilm; protein level decreases in stationary phase cultures	-0.233471	-0.020319	0+
2179	orf19.7156	FAA2-3	Predicted acyl CoA synthetase	-0.126271	-0.00178073	0+
2180	orf19.7158		Protein of allantoate permease family; fungal-specific (no human or murine homolog); Hap43p-repressed gene	-0.0412987	-0.158422	0+
1554	orf19.7161	SUI3	Putative translation initiation factor; genes encoding ribosomal subunits, translation factors, and tRNA synthetases are downregulated upon phagocytosis by murine macrophage	0.180746	0.28254	4+
2182	orf19.7176	NPT1	Putative nicotinate phosphoribosyltransferase, involved in NAD salvage pathway; fungal-specific (no human or murine homolog)	1.47591	-0.207682	1+
4271	orf19.7184		Ortholog of C. parapsilosis CDC317 : CPAR2_702340, Candida tenuis NRRL Y-1498 : CANTEDRAFT_112965, Debaryomyces hansenii CBS767 : DEHA2G16566g and Candida dubliniensis CD36 : CD36_73640	0.034172	-0.0263248	NA
1161	orf19.7188	RPP1B	Conserved acidic ribosomal protein, likely involved in regulation of translation elongation; interacts with Rpp2A; 1 of 4 similar C. albicans ribosomal proteins (Rpp1A, Rpp1B, Rpp2A, Rpp2B); induced by Tbf1; Spider biofilm repressed	0.177806	0.213723	0+
4291	orf19.719		Ortholog(s) have ubiquitin-protein ligase activity and role in ER-associated protein catabolic process, fungal-type cell wall organization, negative regulation of transcription by transcription factor catabolism	-0.369107	-0.143453	NA
4310	orf19.720	GST3	Glutathione S-transferase; expression regulated upon white-opaque switch; induced by human neutrophils; peroxide-induced; induced by alpha pheromone in SpiderM medium; Spider biofilm induced	-0.0771733	0.351151	NA
1546	orf19.721		Ortholog(s) have polynucleotide 5'-hydroxyl-kinase activity, role in rRNA processing, termination of RNA polymerase I transcription and nucleolar chromatin localization	0.0414455	0.53268	4+
2192	orf19.7213		Putative ATP-dependent RNA helicase; fungal-specific (no human or murine homolog)	-0.202626	-0.149399	0
2609	orf19.7218	RBE1	Pry family cell wall protein; repressed by Rim101, Efg1, Ssn6, alkaline conditions; O-glycosylation; no GPI anchor predicted; ketoconazol induced; regulated by Sef1, Sfu1, Hap4; flow model biofilm induced; Spider biofilm repressed	0.425951	0.323273	0+
3292	orf19.7219	FTR1	High-affinity iron permease; required for mouse virulence, low-iron growth; iron, amphotericin B, caspofungin, ciclopirox, Hog1p, Sef1p, Sfu1p, and Hap43p regulated; complements S. cerevisiae ftr1 iron transport; Hap43p-repressed	0.028618	-0.111978	0+
3294	orf19.7231	FTR2	High-affinity iron permease; probably interacts with ferrous oxidase; regulated by iron level, ciclopirox olamine, amphotericin B, caspofungin; complements S. cerevisiae ftr1 iron transport defect; Hap43-repressed; Spider biofilm induced	0.128177	-0.16249	0
4005	orf19.7237		Ortholog(s) have arylformamidase activity and role in NAD biosynthetic process	0.0132381	-0.107237	NA
1202	orf19.7238	NPL3	Putative RNA-binding protein; required for normal flow model biofilm growth; nuclear export is facilitated by Hmt1p; transcript upregulated in RHE model of oralcandidiasis; Spider biofilm repressed	-0.168297	0.0284016	0+
2198	orf19.7243		Deoxycytidine monophosphate (dCMP) deaminase; role in dUMP and dTMP biosynthesis; Spider biofilm repressed	-0.105292	0.172627	1+
1129	orf19.7245		Ortholog(s) have tRNA (5-methylaminomethyl-2-thiouridylate)-methyltransferase activity, role in mitochondrial tRNA thio-modification and mitochondrion localization	-0.0789861	-0.0271692	0+
3295	orf19.7257		Ortholog(s) have role in mismatch repair, reciprocal meiotic recombination and MutLbeta complex localization	1.09123	1.30392	0+
649	orf19.7265		Putative zinc-finger domain protein with a predicted role in pre-mRNA splicing; Hap43-repressed; Spider biofilm repressed	-0.254571	0.0848964	0+
3474	orf19.7269		Putative polyamine acetyltransferase; acetylates polyamines (e.g. putrescine, spermidine, spermine) and aralkylamines (e.g. tryptamine, phenylethylamine); Spider biofilm repressed	-0.0682533	-0.165531	0+
1536	orf19.728	TSC11	Protein similar to S. cerevisiae Tsc11p which is involved in sphingolipid biosynthesis; transposon mutation affects filamentous growth	-0.145483	-0.108075	0+
1476	orf19.7281	PDK2	Putative pyruvate dehydrogenase kinase; mutation confers hypersensitivity to amphotericin B	#N/A	0	4+
2814	orf19.729.1	RGD3	Putative Rho GTPase activating protein; fungal-specific (no human or murine homolog)	-0.0375497	-0.0906897	0
884	orf19.7298	CHS2	Chitin synthase; nonessential; required for wild-type chitin deposition in hyphae; transcript regulated during dimorphic transition; Chs1 and Chs2, but not Chs3, are inhibited by the protoberberine HWY-289	0.0790301	-0.242332	2+
2614	orf19.7306		Aldo-keto reductase family protein; increased transcription associated with MDR1 overexpression, benomyl or long-term fluconazole treatment; overexpression does not affect drug or oxidative stress sensitivity; stationary phase enriched	3.3796	-0.130274	0+
3308	orf19.7310		Protein with a role in directing meiotic recombination events to homologous chromatids; induced by ciclopirox olamine; positively regulated by Sfu1; Hog1, fluconazole-repressed; Hap43-induced; Spider biofilm induced	0.0537027	-0.117728	0+
2615	orf19.7313	SSU1	Protein similar to S. cerevisiae Ssu1 sulfite transport protein; Tn mutation affects filamentous growth; regulated by Gcn2 and Gcn4; induced by nitric oxide; Hap43-repressed; Spider and flow model biofilm induced	-0.524819	-0.187186	0+
2616	orf19.7319	SUC1	Zinc-finger transcription factor; regulates alpha-glucosidase exression; complements S. cerevisiae suc2 for sucrose utilization and mal13 maltase defect; required for yeast cell adherence to silicone substrate; rat catheter biofilm induced	-0.146526	0.0472338	0+	Y
2617	orf19.7320	LIP7	Probable lipase, part of a gene family whose members are differentially expressed during infection; lacks a signal sequence for secretion, unlike other family members; may have a role in nutrition or in creating an acidic microenvironment	0.545125	-0.0535727	0+
2618	orf19.7322		Protein of unknown function; S. cerevisae ortholog Ypl225w interacts with ribosomes; rat catheter biofilm induced	-0.314995	-0.0536178	0+
2229	orf19.7324	THI13	Thiamin pyrimidine synthase; synthesis of the thiamine precursor hydroxymethylpyrimidine phosphate; single-turnover enzyme that provides histidine for HMP-P formation; induced by nitric oxide independent of Yhb1; Spider biofilm induced	-0.0335245	-0.056584	0+
1059	orf19.733		Ortholog(s) have endoplasmic reticulum localization	0.0790457	-0.22953	0+
1088	orf19.7330		Protein with a predicted heme oxygenase domain; Spider biofilm induced	0.0252859	0.0135043	0+
2619	orf19.7331	FCY24	Putative transporter; more similar to S. cerevisiae Tpn1, which is a vitamin B6 transporter, than to purine-cytosine permeases; transcription is regulated by Nrg1; Spider biofilm induced	-0.0461549	-0.198093	0+
1526	orf19.7332	ELF1	Putative mRNA export protein; Walker A and B (ATP/GTP binding) motifs; required for wild-type morphology, growth; expressed in hyphal, pseudohyphal, and yeast form; Hap43-induced; Spider and flow model biofilm induced	0.139233	-0.0748615	3.5+
2620	orf19.7336		Predicted membrane transporter; member of the drug:proton antiporter (14 spanner) (DHA2) family, major facilitator superfamily (MFS); Spider biofilm induced	-0.307988	0.283268	0+
1479	orf19.7337		Protein with a nischarin related domain and leucine rich repeats; Spider biofilm induced	0.00497348	0.0776655	0+
1480	orf19.7339	BGL22	Putative glucanase; induced during cell wall regeneration	-0.299414	-0.115246	0+
1075	orf19.734	GLK1	Putative glucokinase; transcript regulated upon yeast-hyphal switch; Efg1 regulated; fluconazole-induced; induced in core stress response; colony morphology-related gene regulation by Ssn6; GlcNAc-induced protein	-0.242539	-0.00287068	0+
1195	orf19.7355	SSN8	Ortholog of S. cerevisiae Ssn8; a component of RNA polymerase II holoenzyme; mutants are viable and are sensitive to hydrogen peroxide medium	-0.238622	0.376879	3+
2239	orf19.7359	CRZ1	Calcineurin-regulated C2H2 transcription factor; role in maintenance of membrane integrity, azole tolerance; not required for mouse virulence; repressed by low iron; regulates Ca++ influx during alkaline pH response; Spider biofilm induced	-0.252736	-0.168943	1+
5	orf19.7361		Ortholog(s) have tRNA-intron endonuclease activity, role in tRNA-type intron splice site recognition and cleavage and mitochondrial outer membrane, tRNA-intron endonuclease complex localization	#N/A	#N/A	1+
2629	orf19.7364		Has domain(s) with predicted N,N-dimethylaniline monooxygenase activity, NADP binding, flavin adenine dinucleotide binding activity and role in oxidation-reduction process	0.00716536	-0.288631	0+
1155	orf19.7367	UBP1	Ortholog(s) have ubiquitin-specific protease activity, role in protein deubiquitination and endoplasmic reticulum localization	-0.0586712	-0.104812	0+
2630	orf19.7369		Ortholog(s) have S-adenosylmethionine-dependent methyltransferase activity, transferase activity, transferring alkyl or aryl (other than methyl) groups activity and role in tRNA methylation, wybutosine biosynthetic process	0.00440907	0.0153224	0+
2241	orf19.7370		Possible G-protein coupled receptor; vacuolar membrane transporter for cationic amino acids; PQ-loop motif; rat catheter and Spider biofilm induced	-0.00765033	-0.163925	0+
2631	orf19.7377	ASE1	Putative microtubule-associated protein; member of conserved Mcm1p regulon; periodic mRNA expression, peak at cell-cycle G2/M phase	0.524297	0.281217	0+
3321	orf19.7382	CAM1	Putative translation elongation factor eEF1 gamma; protein level decreased in stationary phase cultures; Spider biofilm repressed	-0.129922	-0.011929	1+
4001	orf19.7385		CCCH zinc finger protein; Spider biofilm induced	0.00912287	-0.173489	NA
4305	orf19.7386		Ortholog(s) have ribosome binding activity	-0.140047	-0.201262	NA
2245	orf19.7389	REV3	Ortholog(s) have DNA-directed DNA polymerase activity, role in error-free translesion synthesis, error-prone translesion synthesis and cytosol, mitochondrion, nuclear chromatin, nucleus, zeta DNA polymerase complex localization	-0.0954667	-0.141436	0+
2246	orf19.7391	OCH1	Alpha-1,6-mannosyltransferase; initiates N-glycan outer chain branch addition; similar to S. cerevisiae Och1p; required for wild-type virulence in mouse intravenous infection; fungal-specific (no human or murine homolog)	0.152885	0.553868	3+
1355	orf19.7396		Protein of unknown function; Spider biofilm induced; Hap43-repressed	-0.0528762	-0.0311202	1+
2249	orf19.7397		Ortholog(s) have sequence-specific DNA binding activity and cytoplasm, nucleus, spindle localization	0.0870232	-0.0869447	0+
2634	orf19.7403		Ortholog of S. cerevisiae : YML020W, C. glabrata CBS138 : CAGL0G07062g, C. parapsilosis CDC317 : CPAR2_404740 and Candida tenuis NRRL Y-1498 : CANTEDRAFT_107670	-0.0492868	0.0243264	0+
1080	orf19.7404		Catabolic L-serine (L-threonine) deaminase;, catalyzes degradation of L-serine and L-threonine; required to use serine or threonine as a sole nitrogen source; Spider biofilm repressed	-0.0860754	-0.0628686	0+
2252	orf19.7412	MUB1	Predicted protein required for ubiquitination; role in meiosis, regulation of cell budding in S. cereviae; Spider biofilm induced	0.0948294	0.512714	0+
1852	orf19.742	ALD6	Putative aldehyde dehydrogenase; stationary phase enriched protein; expression regulated upon white-opaque switch; rat catheter biofilm induced; rat catheter and Spider biofilm induced	-0.261646	-0.103352	1+
2635	orf19.7427		Ortholog(s) have Golgi apparatus, fungal-type vacuole membrane localization	0.0175947	-0.0577836	0+
2636	orf19.7428	APN1	Ortholog of S. cerevisiae Apn1; an AP endonuclease; transcript induced by interaction with macrophages; fungal-specific (no human or murine homolog)	-0.0508186	0.19211	0+
1548	orf19.7433		Ortholog(s) have nucleocytoplasmic transporter activity, structural constituent of nuclear pore activity	-0.763496	-0.280908	2+
2637	orf19.7437		Putative protein of unknown function; Hap43p-repressed gene; ortholog of S. cerevisiae YJL218W	-0.0463831	0.156257	0+
1853	orf19.744	GDB1	Putative glycogen debranching enzyme; expression is regulated upon white-opaque switch; regulated by Nrg1, Tup1; rat catheter biofilm repressed	0.00540908	-0.16595	0+
1298	orf19.7440	HST6	ABC transporter related to mammalian P-glycoproteins; functional homolog of S. cerevisiae Ste6p (a-pheromone transporter); required for mating of MTLa cells; a-type specific, not regulated during white-opaque or yeast-hyphal switching	-0.0104182	-0.0347702	0+
4202	orf19.7444		Ortholog(s) have cytoplasm, holo TFIIH complex localization	0.111285	0.0865432	NA
2638	orf19.7447	JEN1	Lactate transporter; induced by lactic acid, activated by Cat8; alkaline repressed by Rim101; localizes to plasma membrane; Spider biofilm induced	0.0552857	-0.265525	1+
1242	orf19.7448	LYS9	Saccharopine dehydrogenase; lysine biosynthesis; soluble protein in hyphae; amphotericin B repressed; Gcn4-regulated; colony morphology-related gene regulation by Ssn6; protein present in exponential and stationary growth phase yeast	-0.0872929	0.192854	4+
1043	orf19.7459		Putative mitochondrial protein with a predicted role in respiratory growth; fluconazole-induced; ketoconazole-repressed; mutants display a strong defect in flow model biofilm formation; Spider biofilm induced	0.367076	-0.284492	3+
3886	orf19.7460		Putative 2'-O-methyltransferase with a predicted role in tRNA modification; transcription is activated in the presence of elevated CO2	-0.252176	-0.148753	NA
1099	orf19.7463		Ortholog(s) have role in ascospore wall assembly and ascospore wall, nuclear envelope localization	-0.334277	-0.111272	2+
2640	orf19.7464		Putative subtilisin-family protease; mutation confers hypersensitivity to toxic ergosterol analog	-0.117533	0.0917575	2+
3333	orf19.7475	PHO81	Protein involved in regulation of hyphal development; required for response to farnesoic acid; possibly adherence-induced	-0.100434	0.118595	0+
957	orf19.7478		Ortholog(s) have antioxidant activity, di-trans,poly-cis-decaprenylcistransferase activity, protein heterodimerization activity, trans-hexaprenyltranstransferase activity	0.0358077	0.093751	3.5+
1564	orf19.7479	NTH1	Neutral trehalase; hyphal induction in mutant delayed but not reduced overall; not required for virulence in mice; possible regulatory cAMP-dependent phosphorylation at S10,S213; Hap43-repressed gene; Spider biofilm induced	-0.00620698	0.0385431	2+
910	orf19.7484	ADE1	Phosphoribosylaminoimadazole succinocarboxamide synthetase, enzyme of adenine biosynthesis; not induced in GCN response, unlike the S. cerevisiae ortholog; fungal-specific (no human or murine homolog); levels decrease in stationary phase	-0.112737	0.255299	3.5+
2266	orf19.7486	MRPL6	Putative mitochondrial ribosomal protein	-0.187813	-0.363902	3.5+
2641	orf19.7490		Predicted membrane transporter; fucose:proton symporter family member, MFS superfamily; flow model biofilm induced	-0.0216408	-0.129108	0+
2642	orf19.7495		Protein with NADPH oxidoreductase containing flavin mononucleotide (FMN) domain; induced by nitric oxide	-0.0896365	-0.153545	1+
3918	orf19.7503	CDA2	Putative chitin deacetylase; transcription is positively regulated by Tbf1p	-0.101366	0.16469	NA
1486	orf19.7512		Has domain(s) with predicted electron carrier activity, heme binding, iron ion binding, oxidoreductase activity, acting on paired donors and with incorporation or reduction of molecular oxygen, more	-0.0328188	-0.239758	0+
1487	orf19.7513	ALK2	N-Alkane inducible cytochrome P450	-0.178299	-0.244083	0+
2643	orf19.7514	PCK1	Phosphoenolpyruvate carboxykinase; glucose, C-source, yeast-hypha, Hap43 regulated; fluconazole, phagocytosis, H2O2, oral candidasis, Spider/rat catheter/flow model biofilm induced; repressed in biofilm by Bcr1, Tec1, Ndt80, Rob1, Brg1	-0.132166	0.0721141	1+
3336	orf19.7516		Putative glycoside hydrolase; Hap43-induced gene	-0.0446943	-0.0799162	3+
2272	orf19.7517	CHT1	Chitinase; putative N-terminal catalytic domain; has secretory signal sequence; lacks S/T region and N-glycosylation motifs of Chs2p and Chs3p; alkaline downregulated; expression not detected in yeast-form or hyphal cells	-0.217948	-0.340705	0+
2644	orf19.7518	ZCF38	Putative Zn(II)2Cys6 transcription factor	0.210766	-0.231534	0+
4065	orf19.752		Has domain(s) with predicted methyltransferase activity and role in metabolic process	0.0619487	-0.084674	NA
1247	orf19.7520	POT1	Putative peroxisomal 3-oxoacyl CoA thiolase; transcript regulated by Nrg1 and Mig1; farnesol regulated; Hap43-repressed	-0.173542	-0.280126	0+
1488	orf19.7522		Protein with a pyridoxal phosphate-dependent transferase domain; Hap43-repressed; mutation confers hypersensitivity to amphotericin B; Spider biofilm repressed	-0.0496573	-0.0407516	3.5+
2273	orf19.7523	MKC1	MAP kinase; role in biofilm formation, contact-induced invasive filamentation, systemic virulence in mouse, cell wall structure/maintenance, caspofungin response; phosphorylated on surface contact, membrane perturbation, or cell wall stress	-0.0401422	0.0778011	2+	Y
972	orf19.754	YBN5	P-loop ATPase with similarity to human OLA1 and bacterial YchF; Spider biofilm repressed	-0.412449	0.517278	0+
2287	orf19.7551	ALO1	D-Arabinono-1,4-lactone oxidase involved in biosynthesis of dehydro-D-arabinono-1,4-lactone, which has a protective role against oxidative damage; plasma membrane-localized;required for full virulence in a mouse model of systemic infection	0.0110557	-0.179986	0+
2385	orf19.756	SAP7	Pepstatin A-insensitive secreted aspartyl protease; self-processing; expressed in human oral infection; Ssn6p-regulated; role in murine intravenous infection; induced during, but not required for, murine vaginal infection; N-glycosylated	0.0690383	0.183613	0+
2647	orf19.7565	GNP3	Putative high-affinity glutamine permease; fungal-specific (no human or murine homolog)	0.755462	0.305294	0+
2289	orf19.7566		Predicted amino acid transport domain; transcript upregulated in clinical strains from HIV+ patients with oral candidiasis; alkaline upregulated by Rim101; rat catheter, Spider and flow model biofilm induced	-0.727397	-0.10556	0+
4262	orf19.7567		Protein of unknown function; induced by alpha pheromone in SpiderM medium	0.117955	0.11502	NA
4283	orf19.7568		Ortholog of S. cerevisiae : SPS4, C. glabrata CBS138 : CAGL0I09834g, C. parapsilosis CDC317 : CPAR2_200810, Candida tenuis NRRL Y-1498 : CANTEDRAFT_112327 and Debaryomyces hansenii CBS767 : DEHA2G06336g	-0.445448	0.0272712	NA
3750	orf19.757		Ortholog of S. cerevisiae : YPR089W, C. glabrata CBS138 : CAGL0K08008g, C. parapsilosis CDC317 : CPAR2_105630 and Candida tenuis NRRL Y-1498 : CANTEDRAFT_129373	-0.119341	-0.16309	NA
992	orf19.7572	SPT7	Putative SAGA transcriptional regulatory complex subunit; mutation confers hypersensitivity to toxic ergosterol analog, and to amphotericin B	0.350887	2.97258	1+
2648	orf19.7577	MSS51	Putative mRNA maturation factor; fungal-specific (no human or murine homolog)	-0.1364	0.104214	1+
3930	orf19.758		Ortholog(s) have signal sequence binding activity, role in vacuolar transport and late endosome localization	-0.180631	-0.0366891	NA
1296	orf19.7585	INO1	Inositol-1-phosphate synthase; antigenic in human; repressed by farnesol in biofilm or by caspofungin; upstream inositol/choline regulatory element; glycosylation predicted; rat catheter, flow model induced; Spider biofilm repressed	0.173927	-0.106432	3+
1494	orf19.7590		Putative NADH-ubiquinone oxidoreductase; identified in detergent-resistant membrane fraction (possible lipid raft component); predicted N-terminal acetylation; repressed by nitric oxide	-0.3256	-0.0627055	3+
1289	orf19.7594		Protein of unknown function; Spider biofilm induced	0.063689	0.162567	1+
2650	orf19.7597	PGA12	Putative GPI-anchored protein	-0.0739465	-0.0639113	0+
4320	orf19.7598		Ortholog(s) have histone acetyltransferase activity, role in histone acetylation and Ada2/Gcn5/Ada3 transcription activator complex localization	0.09145	0.00647673	NA
11	orf19.7604		Ortholog(s) have Rab guanyl-nucleotide exchange factor activity and role in early endosome to Golgi transport, intra-Golgi vesicle-mediated transport, regulation of Rab GTPase activity	-0.16219	0.330365	2+
1580	orf19.7611	TRX1	Thioredoxin; involved in response to reactive oxygen species; biofilm, benomyl, flucytosine, peroxide, Hap43 induced; amphotericin B, caspofungin repressed; induced by human neutrophils; macrophage-repressed gene	-0.0534481	0.193677	2+
2651	orf19.7619		Protein with a mitochondrial distribution and morphology domain; possibly an essential gene, disruptants not obtained by UAU1 method; rat catheter and Spider biofilm induced	-0.000919536	-0.019421	3+
3352	orf19.7629		Ortholog(s) have Seh1-associated complex, cytosol, extrinsic to fungal-type vacuolar membrane, ribosome localization	-0.213646	-0.103162	0+
1805	orf19.763		Small subunit of the heterodimeric cap binding complex; component of the spliceosomal commitment complex; Spider biofilm repressed	-0.100459	-0.0532372	2+
745	orf19.7635	DRS1	Putative nucleolar DEAD-box protein; Hap43-induced; mutation confers hypersensitivity to 5-fluorouracil (5-FU), tubercidin (7-deazaadenosine); Tbf1-induced; repressed in core stress response	0.0435984	0.310286	3+
2652	orf19.7637	YHB4	Protein related to flavohemoglobins; not required for wild-type nitric oxide resistance; has predicted globin, FAD-binding, and NAD(P)-binding domains but lacks some conserved residues of flavohemoglobins; Hap43p-repressed gene	-0.170648	0.0891439	0+
1500	orf19.7638	PRO1	Putative gamma-glutamyl kinase; transcript regulated by Nrg1; regulated by Gcn2 and Gcn4; Hap43-repressed gene; early-stage flow model biofilm induced gene	-0.247563	-0.33397	4+
2881	orf19.764		Ortholog(s) have clathrin-coated vesicle, cytoplasm localization	0.105383	-0.162518	4+
3354	orf19.7650	LTV1	Putative GSE complex component; repressed by prostaglandins	0.0521853	0.217994	1+
3481	orf19.7661	HMI1	ATP-dependent 3' - 5' helicase involved in maintenance of mitochondrial DNA; ortholog of S. cerevisiae Hmi1p	-0.00215003	-0.116734	0+
2653	orf19.7666		Predicted membrane transporter, member of the anion:cation symporter (ACS) family, major facilitator superfamily (MFS)	-1.325	0.101635	0+
1164	orf19.7668	MAL2	Alpha-glucosidase; hydrolyzes sucrose for sucrose utilization; transcript regulated by Suc1, induced by maltose, repressed by glucose; Tn mutation affects filamentous growth; upregulated in RHE model; rat catheter and Spider biofilm induced	0.0382369	-0.383762	0+
1121	orf19.7678	ATP16	Subunit of the mitochondrial F1F0 ATP synthase; sumoylation target; protein newly produced during adaptation to the serum; Spider biofilm repressed	-0.670709	-0.441597	3+
905	orf19.769	IFE1	Putative medium-chain alcohol dehydrogenase; rat catheter and Spider biofilm repressed	-0.104234	-0.146317	0+
2682	orf19.778	PIL1	Eisosome component; predicted role in endocytosis; echinocandin-binding protein; localizes to cell surface of hyphae, but not yeast-form cells; biofilm induced; Hap43-induced	0.0341561	-0.0479125	1+
2402	orf19.781	DUR31	High affinity spermidine transporter; expression is induced by urea; fungal-specific (no human or murine homolog); not required for virulence in a mouse intravenous model	-0.0400991	0.0033143	0+
2401	orf19.782		Ortholog(s) have serine hydrolase activity, triglyceride lipase activity, role in lipid homeostasis and lipid particle localization	-0.255892	-0.148057	1+
1036	orf19.789	PYC2	Putative pyruvate carboxylase, binds to biotin cofactor; up-regulated in mutant lacking the Ssk1p response regulator protein, upon benomyl treatment, or in an azole-resistant strain overexpressing MDR1; stationary phase enriched protein	0.186668	0.286858	4+
2834	orf19.795	VPS36	ESCRT II protein sorting complex subunit; involved in Rim8 processing and proteolytic activation of Rim101, which regulates pH response; role in uptake of Histatin-5 into vacuole	-0.117645	-0.108851	0+
3775	orf19.799	STE4	Beta subunit of heterotrimeric G protein of mating signal transduction pathway; required for mating; transcript is specific to cells homozygous at MTL; induced by alpha pheromone; ortholog of S. cerevisiae Ste4	0.0956224	-0.203965	NA
1696	orf19.804		Putative mitochondrial carrier family transporter; rat catheter biofilm induced	0.077073	0.64869	0+
3393	orf19.805		Putative protein of unknown function; possibly mitochondrial; Hap43-repressed; Spider biofilm repressed	0.0965407	-0.228997	3+
1695	orf19.807	CHS5	Putative chitin biosynthesis protein; fungal-specific (no human or murine homolog); transcription decreases upon yeast-to-hyphal switch	-0.0212688	-0.123677	0+
2538	orf19.809		Ortholog(s) have role in maturation of LSU-rRNA from tricistronic rRNA transcript (SSU-rRNA, 5.8S rRNA, LSU-rRNA) and nucleolus, preribosome localization	0.0643807	0.415036	2+
3928	orf19.811		Protein of unknown function; mutant is viable; Hap43-repressed	-0.00484176	-0.0845223	NA
1534	orf19.814	SSY1	Amino acid sensor; required for wild-type hyphal growth on solid serum or Lees media, not under all conditions; 12 predicted membrane spanning regions; Hap43-repressed; Spider biofilm induced	0.20373	0.0513933	0+
1541	orf19.829	SCH9	Protein kinase; involved in growth control, cell size, resistance to rapamycin, cations, chlamydospore formation, filamentous growth under some conditions, and virulence; prevents hyphal growth in hypoxia at high CO2; Spider biofilm induced	-0.176401	0.0733545	0+
1122	orf19.831		Ortholog of C. parapsilosis CDC317 : CPAR2_211360, Candida tenuis NRRL Y-1498 : CANTEDRAFT_115359, Debaryomyces hansenii CBS767 : DEHA2D06886g and Candida dubliniensis CD36 : CD36_18570	-0.127166	1.53353	0+
3405	orf19.835		Ortholog(s) have role in nucleosome mobilization and Ino80 complex localization	-0.0249891	-0.0552547	0+
2757	orf19.84	CAN3	Predicted amino acid transmembrane transporter; transcript regulated by white-opaque switch; Hap43-repressed gene	-0.0938985	-0.0479683	0+
3777	orf19.841		Ortholog(s) have role in Golgi vesicle transport and Golgi membrane localization	-0.17906	-0.161837	NA
1818	orf19.843		Putative DNA repair exonuclease; fungal-specific (no human or murine homolog)	0.157947	-0.00788319	0+
2386	orf19.847	YIM1	Protein similar to protease of mitochondrial inner membrane; increased transcription is observed upon benomyl treatment; macrophage-downregulated gene	0.122903	0.0697606	2+
2328	orf19.850		Ortholog(s) have protein-N-terminal asparagine amidohydrolase activity, role in cellular protein modification process, protein catabolic process and cytosol, mitochondrion, nucleus localization	0.0749274	0.118609	0+
3383	orf19.851		Protein of unknown function; repressed by Rim101; negatively modulates intracellular ATP levels during the development of azole resistance; induced by Ca(2+) in a calcineurin-dependent manner; Spider biofilm induced	-0.0652137	0.00125339	0+
2382	orf19.863		Ortholog(s) have structural constituent of ribosome activity and mitochondrial large ribosomal subunit localization	0.0342527	-0.258134	3+
2381	orf19.864		Ortholog(s) have role in nuclear-transcribed mRNA catabolic process, 3'-5' exonucleolytic nonsense-mediated decay and cytosol, polysome localization	-0.0851167	-0.157712	0+
1190	orf19.866	RAD32	Protein similar to S. cerevisiae protein with role in nucleotide excision repair; down-regulation associated with azole resistance; Hap43p-repressed gene	-0.0383662	0.0388438	0+
1356	orf19.873		Ortholog of Candida albicans WO-1 : CAWG_04115	0.0536871	0.0124685	1+
1308	orf19.889	THI20	Putative trifunctional enzyme of thiamine biosynthesis, degradation and salvage; Spider biofilm induced	0.00234073	0.0675511	0+
1505	orf19.895	HOG1	MAP kinase of osmotic-, heavy metal-, and core stress response; role in regulation of glycerol, D-arabitol in response to stress; phosphorylated in response to H2O2 (Ssk1-dependent) or NaCl; mutant induces protective mouse immune response	0.0212972	-0.0742737	0+
2585	orf19.896	CHK1	Histidine kinase; 2-component signaling, cell wall synthesis; hyphal growth defect; avirulent in mouse, not rat vaginal infection; phagocytosis rate increased; Spider biofilm induced; required for RPMI biofilm; Bcr1-induced in a/a biofilm	0.160592	-0.0303599	0+	Y
2091	orf19.897	VPS20	ESCRT III complex protein; role in multivesicular body (MVB) trafficking; required for processing of Rim8; Bcr1-repressed in RPMI a/a biofilms	0.017411	-0.120181	0
1227	orf19.898	HEM2	Putative porphobilinogen synthase; induced in high iron; protein level decrease in stationary phase cultures; Spider biofilm repressed	0.0704426	-0.0544875	3+
1579	orf19.906	ROM2	Putative GDP/GTP exchange factor; possibly an essential gene, disruptants not obtained by UAU1 method; Spider biofilm induced	0.0521987	0.315756	3.5+
1095	orf19.908	FEN12	Putative protein with a predicted role in the elongation of fatty acids; amphotericin B, caspofungin repressed	-0.0016681	-0.129627	3+
1445	orf19.916		Putative protein involved in apoptosis; Spider biofilm induced	0.242408	-0.0450238	1+
1725	orf19.923	THR1	Putative homoserine kinase; regulated by Tup1; amphotericin B repressed; regulated by Gcn2 and Gcn4; Spider biofilm repressed	0.183139	0.276667	4+
4144	orf19.927		Ortholog(s) have role in positive regulation of transcription from RNA polymerase II promoter, telomere maintenance and EKC/KEOPS complex, cytosol, nucleus localization	-0.0547436	0.22292	NA
2205	orf19.942	KRE62	Putative subunit of glucan synthase; macrophage-induced gene; Bcr1-regulated in a/a RPMI biofilms	0.307886	0.0999674	0+
2206	orf19.943	FET33	Putative multicopper ferro-O2-oxidoreductase; repressed in core caspofungin response; fails to complement S. cerevisiae fet3 iron-related phenotypes; rat catheter and Spider biofilm induced	0.14109	-0.093108	0+
4165	orf19.944	IFG3	Putative D-amino acid oxidase; Spider biofilm induced	0.338613	0.291969	NA
3972	orf19.947	MRP17	Predicted mitochondrial ribosomal protein	0.611505	0.0999218	NA
1275	orf19.955		Protein of unknown function; Spider biofilm repressed	0.161807	0.749079	4+
3297	orf19.956		Ortholog(s) have role in fermentation and mitochondrion localization	0.0777891	0.751417	0+
1266	orf19.968	PGA14	Putative GPI-anchored protein; induced during cell wall regeneration; regulated by Ssn6p	0.330368	-0.0764592	0+
2797	orf19.97	CAN1	Basic amino acid permease; complements lysine transport mutation; 10 predicted transmembrane regions, 3 predicted N-glycosylation sites; phagocytosis by macrophages induces transcript; rat catheter, Spider and flow model biofilm induced	-0.0704702	-0.00383799	0+
1039	orf19.972		Ortholog(s) have 5'-flap endonuclease activity, role in DNA-dependent DNA replication and Slx1-Slx4 complex localization	0.0919579	0.0405513	1+
1569	orf19.978	BDF1	Bromodomain transcription factor; repressed upon adherence to polystyrene; reduced mRNA abundance detected in null mutant; macrophage/pseudohyphal-repressed; possibly essential, disruptants not obtained by UAU1 method	0.185436	0.492824	4+
167	orf19.979	FAS1	Beta subunit of fatty-acid synthase; multifunctional enzyme; Hap43, fluconazole-induced; amphotericin B, caspofungin repressed; macrophage/pseudohyphal-induced; Spider biofilm repressed	0.275395	1.10664	4+
2024	orf19.984	PHO8	Putative repressible vacuolar alkaline phosphatase; Rim101-induced transcript; regulated by Tsa1, Tsa1B in minimal media at 37 deg; possibly adherence-induced	-0.16161	-0.253068	0
2727	orf19.988		Protein of unknown function; oral infection upregulated gene; upregulated in strains from HIV+ patients with oral candidiasis; mutants have reduced ability to damage oral epithelial cells; transcript possibly regulated upon hyphal formation	-0.140034	-0.0680367	0
2798	orf19.99	HAL21	Putative phosphoadenosine-5'-phosphate or 3'-phosphoadenosine 5'-phosphosulfate phosphatase; possible role in sulfur recycling; ortholog of S. cerevisiae Met22; predicted Kex2 substrate; F-12/CO2 biofilm induced	-0.244717	0.277197	1+
2023	orf19.991	DJP1	Similar to bacterial DnaJ; reported to have a role in peroxisome biogenesis; induced in low iron and upon adherence to polystyrene	0.126793	0.248538	2+

## Sheet: Sheet 2
Merck Strain ID	orf19 name	Common	Description	LOG2 Enrichment in Wash:Adhered without DOX	LOG2 Enrichment in Wash:Adhered with DOX	Essentiality Score
992	orf19.7572	SPT7	Putative SAGA transcriptional regulatory complex subunit; mutation confers hypersensitivity to toxic ergosterol analog, and to amphotericin B	0.350887	2.97258	1+
1122	orf19.831		Ortholog of C. parapsilosis CDC317 : CPAR2_211360, Candida tenuis NRRL Y-1498 : CANTEDRAFT_115359, Debaryomyces hansenii CBS767 : DEHA2D06886g and Candida dubliniensis CD36 : CD36_18570	-0.127166	1.53353	0+
1895	orf19.4308	HSL1	Probable protein kinase involved in determination of morphology during the cell cycle of both yeast-form and hyphal cells via regulation of Swe1p and Cdc28p; required for full virulence and kidney colonization in mouse systemic infection	0.262664	1.31105	2+
1169	orf19.3071	MIH1	Putative protein phosphatase of the PTP family (tyrosine-specific); ortholog of S. cerevisiae Mih1; mRNA binds She3	0.0925878	1.06141	0+
210	orf19.2600	SPC98	Putative component of the microtubule-nucleating Tub4p (gamma-tubulin) complex; periodic mRNA expression, peak at cell-cycle S/G2 phase	-0.259832	0.999793	1+
1747	orf19.1220	RVS167	SH3-domain- and BAR domain-containing protein involved in endocytosis; null mutant exhibits defects in hyphal growth, virulence, cell wall integrity, and actin patch localization; cosediments with phosphorylated Myo5p	-0.0161042	0.940359	2+
3540	orf19.4062	TRY2	Transcription factor; regulator of yeast form adherence; required for yeast cell adherence to silicone substrate; Spider biofilm induced	0.150734	0.9225	1+
1533	orf19.6155		Ortholog(s) have DNA ligase (ATP) activity	0.0555979	0.791621	3+
3297	orf19.956		Ortholog(s) have role in fermentation and mitochondrion localization	0.0777891	0.751417	0+
2632	orf19.7383	MNN9	Protein of N-linked outer-chain mannan biosynthesis; mutant has defective cell wall	-0.121035	0.704413	3+
2913	orf19.1382	YEA4	Putative uridine diphosphate-N-acetylglucosamine (UDP-GlcNAc) transporter; required for cell wall chitin synthesis; induced by alpha pheromone in SpiderM medium	-0.0428558	0.650476	0+
1144	orf19.5171	PMT1	Protein mannosyltransferase (PMT), required for virulence in mouse systemic infection and for adhesion to epithelial cells; role in hyphal growth and drug sensitivity; Als1p, Sec20p, Kre9p, Pir1p are substrates; one of 5 PMT family members	-0.0347824	0.579183	1+
1186	orf19.1792		Ortholog(s) have ubiquitin-protein ligase activity	-0.0705532	0.560381	3+
3519	orf19.121	ARC18	Putative ARP2/3 complex subunit; mutation confers hypersensitivity to cytochalasin D	-0.0986658	0.554973	3+
972	orf19.754	YBN5	P-loop ATPase with similarity to human OLA1 and bacterial YchF; Spider biofilm repressed	-0.412449	0.517278	0+
